# Supplementary material for: Asymmetric synthesis of isoquinolinonaphthyridines catalyzed by a chiral Brønsted acid
Source: Royal Society of Chemistry journal article supplement (doi:10.1039/c7ob01527e), 2017-01-01
Supplement: c7ob01527e1.pdf [file c7ob01527e1.pdf]

## *Supporting Information*

### **Asymmetric Synthesis of Isoquinolinonaphthyridines Catalyzed by a Chiral Brønsted Acid**

Jianjun Li,<sup>a</sup> Yiwei Fu,<sup>a</sup> Cong Qin,<sup>a</sup> Yang Yu,<sup>a</sup> Hao Li,<sup>\*a</sup> and Wei Wang<sup>\*a,b</sup>

<sup>[a]</sup>*State Key Laboratory of Bioengineering Reactor, Shanghai Key Laboratory of New Drug Design, and School of Pharmacy, East China University of Science and Technology, 130 Mei-long Road, Shanghai, 200237, China*

<sup>[b]</sup>*Department of Chemistry and Chemical Biology, University of New Mexico, Albuquerque, NM 87131-0001, USA*

#### **Table of contents**

|                                                                |            |
|----------------------------------------------------------------|------------|
| <b>I. General Information</b>                                  | <b>S2</b>  |
| <b>II. General procedure for the synthesis of catalysts</b>    | <b>S2</b>  |
| <b>III. Procedure for the synthesis of compound 1</b>          | <b>S3</b>  |
| <b>IV. General procedure for the synthesis of compound 4</b>   | <b>S6</b>  |
| <b>V. Determination of X-ray crystallographic structure 3b</b> | <b>S11</b> |
| <b>VI. References</b>                                          | <b>S14</b> |
| <b>VII. <sup>1</sup>H and <sup>13</sup>C-NMR spectra</b>       | <b>S16</b> |
| <b>VIII. Chiral HPLC analysis spectra</b>                      | <b>S39</b> |
| <b>IX. Other substrates</b>                                    | <b>S51</b> |

## 1. General Information

Unless otherwise noted, all reagents were obtained commercially and used without further purification. Unless otherwise specified, all other reagents were purchased from Acros, Aldrich, Fisher, Adamas-beta Co. Ltd. or TCI and used without further purification. The NMR spectra were recorded on a Varian MERCURY plus-400 (400 MHz,  $^1\text{H}$ ; 100 MHz,  $^{13}\text{C}$ ) spectrometer with chemical shifts reported in ppm relative to the residual deuterated solvent and the internal standard tetramethylsilane. Data for  $^1\text{H}$  NMR are recorded as follows: chemical shift ( $\delta$ , ppm), multiplicity (s = singlet, d = doublet, t = triplet, m = multiplet or unresolved, br = broad singlet, coupling constant(s) in Hz, integration). Chromatography was carried out with silica gel (200-300 mesh) or neutral alumina (200-300 mesh) using mixtures of petroleum ether (b.p. 60-90 °C) and ethyl acetate as eluents. The enantiomeric ratios of products were detected on HPLC (Shimadzu LC-LabSolutions) using a Daicel chiral column. Mass Spectra were obtained by using an electrospray spectrometer Waters Micromass Q-TOF Premier Mass Spectrometer from East China University of Science and Technology mass spectral facility.

## 2. Procedure for the synthesis of catalysts

Catalysts **I**,<sup>[1a]</sup> **II**,<sup>[1b]</sup> **III**,<sup>[1c]</sup> **IV**,<sup>[1d,e]</sup> **V**,<sup>[1f]</sup> **VI**,<sup>[1g]</sup> and **VIII**<sup>[1h]</sup> were known in the literature and **VII** were prepared according to the literature methods.<sup>[1a]</sup>

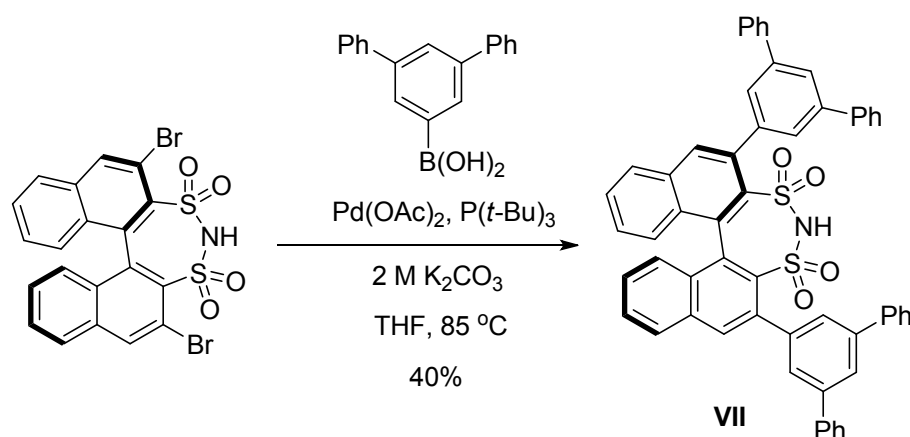

**(R)-(-)-3,3'-bis(3,5-Diphenylphenyl)-1,1'-binaphthalene-2,2'-sulfonamide VII:** To a solution of *(R)*-(-)-3,3'-Dibromo-1,1'-binaphthalene-2,2'-sulfonamide (1.16 g, 2.1 mmol, 1 equiv),  $\text{Pd}(\text{OAc})_2$  (24 mg, 1.05 mmol, 0.05 equiv), and (3,5-diphenylphenyl)boronic acid (1.73 g, 6.3 mmol, 3 equiv) in THF (60 mL) under the protection of  $\text{N}_2$ , was added 2 M aqueous  $\text{K}_2\text{CO}_3$  (13 mL). Then  $\text{P}(t\text{-Bu})_3$  (1M in hexane, 0.21 mL, 0.1 equiv) was added quickly. The reaction mixture was heated for 24 h at 85 °C. After the reaction was completed, the resulting mixture was acidified with 1 M HCl and extracted with  $\text{CHCl}_3$  (30 mL $\times$ 3). The combined organic phase was dried over  $\text{Na}_2\text{SO}_4$  followed by filtration and concentrated in vacuo. The crude product was purified by silica gel column chromatography (petroleum ether/EtOAc 3:1). Then the product was dissolved in DCM and acidified with a 2 M HCl aqueous solution. The combined organic phase was evaporated to give the desired product as a white solid (702 mg, 40% yield).  $^1\text{H}$  NMR (400 MHz,  $\text{CDCl}_3$ ): 8.20 (s, 2H), 8.03 (d,  $J = 8.0$  Hz,

2H), 7.87 (s, 2H), 7.82 (s, 2H), 7.66-7.77 (m, 12H), 7.33-7.49 (m, 14H), 7.22 (d,  $J = 8.0$  Hz, 2H);  $^{13}\text{C}$  NMR (100 MHz,  $\text{CDCl}_3$ ): 141.4, 140.8, 140.7, 139.9, 138.5, 136.7, 134.4, 133.9, 132.3, 132.0, 129.9, 128.9, 128.8, 128.5, 128.2, 127.6, 127.5, 127.4, 126.3, 125.6; HRMS (ESI) calcd for  $\text{C}_{56}\text{H}_{31}\text{NO}_4\text{S}_2$   $[\text{M}-\text{H}]^-$  850.2086, found 850.2085.

### 3. General procedure for the synthesis of compound 2-methylquinolin-3-carbaldehyde derivatives **1**<sup>[2-4]</sup> and Characterization data

Unless otherwise specified, 2-methylquinoline-3-carbaldehyde (as examples) derivatives were synthesized via the following 5 steps:

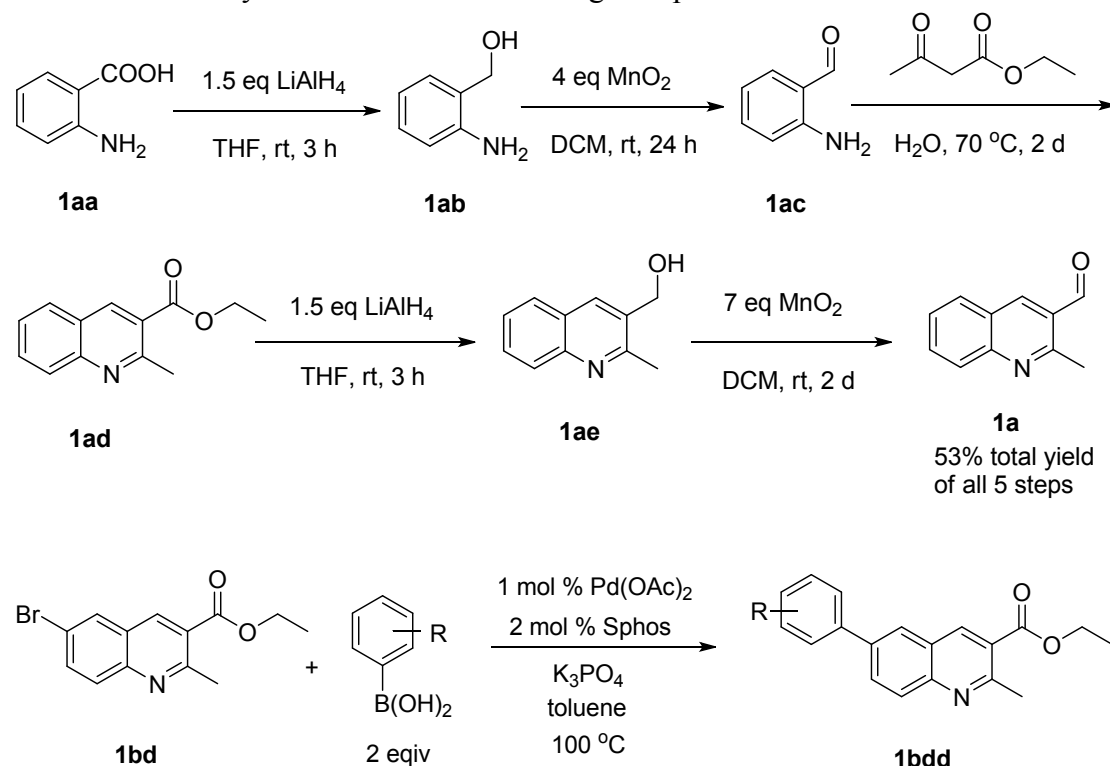

**1ab**,<sup>[2]</sup> **1ac**,<sup>[3]</sup> **1ad**<sup>[4]</sup> were prepared according to the literature.

**1ae**: To an ice-cooled solution of 2-methyl-3-quinolinecarboxylic acid ethyl ester **1ad** (17.66 g, 82.1 mmol) in dry THF (100 mL), a solution of  $\text{LiAlH}_4$  in THF (1M, 125 mL) was added dropwise. The resulting mixture was stirred for 3 h at room temperature. The mixture was slowly treated with ethyl acetate (100 mL), partitioned by saturated  $\text{NaHCO}_3$  (200 mL), and extracted with ethyl acetate three times. The combined organic phase was washed with brine, dried over  $\text{MgSO}_4$ , filtered and concentrated to afford 2-methyl-3-quinolinemethanol **1ae** quantitatively without further purification.

**1a**: To a solution of 2-methyl-3-quinolinemethanol **1ad** (14 g, 81 mmol) in DCM (300 mL) was treated with  $\text{MnO}_2$  (50 g, 567 mmol). The mixture was stirred for 2 d at room temperature. After the reaction was completed (monitored by TLC, PE/EA 3:1,  $R_f = 0.6$ ), the resulting mixture was filtered through celite, washed with DCM, and the combined organic phase was evaporated. The crude product was purified by silica gel column chromatography (PE/EA 12:1) to give the pure product 2-methylquinolin-3-

carbaldehyde **1a** (7.45 g, 53% total yield).

**1bdd**: To a solution of Pd(OAc)<sub>2</sub> (2.2 mg, 0.01 mmol), Sphos (8.2 mg, 0.02 mmol), K<sub>3</sub>PO<sub>4</sub> (849 mg, 4 mmol), 6-bromo-2-methylquinoline-3-carboxylate **1bd** (294 mg, 1 mmol) in toluene was added relevant phenylboronic acid (2 equiv, 2 mmol). Then the reaction was stirred at 100 °C for 24 h. After the reaction was completed (monitored by TLC), the mixture was filtered and evaporated. The crude product was purified by flash silica gel column chromatography to give the product.

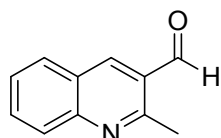

**2-Methylquinolin-3-carbaldehyde (1a)**: yellow solid, 53% total yield. <sup>1</sup>H NMR (400 MHz, CDCl<sub>3</sub>): δ 10.39 (s, 1H), 8.60 (s, 1H), 8.08 (d, *J* = 8.0 Hz, 1H), 7.95 (d, *J* = 8.0 Hz, 1H), 7.85 (t, *J* = 8 Hz, 1H), 7.59 (t, *J* = 8 Hz, 1H), 3.04 (s, 3H); <sup>13</sup>C NMR (100 MHz, CDCl<sub>3</sub>): δ 191.5, 158.3, 149.2, 142.5, 132.7, 129.1, 128.8, 128.0, 127.0, 126.1, 24.0; HRMS (EI) *m/z* calcd for C<sub>11</sub>H<sub>9</sub>NO (M) 171.0684, found 171.0685.

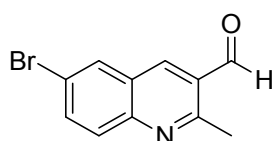

**6-Bromo-2-methylquinoline-3-carbaldehyde (1b)**: yellow solid, 22% total yield. <sup>1</sup>H NMR (400 MHz, CDCl<sub>3</sub>): δ 10.38 (s, 1H), 8.50 (s, 1H), 8.10 (s, 1H), 7.88-7.96 (m, 2H), 3.02 (s, 3H); <sup>13</sup>C NMR (100 MHz, CDCl<sub>3</sub>): δ 191.1, 158.8, 147.8, 141.0, 136.0, 130.8, 130.5, 128.5, 127.2, 120.7, 24.0; HRMS (EI) *m/z* calcd for C<sub>11</sub>H<sub>8</sub>BrNO (M) 248.9789, found 248.9786.

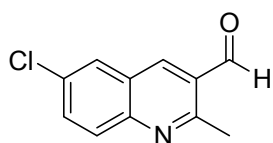

**6-Chloro-2-methylquinoline-3-carbaldehyde (1c)**: yellow solid, 14% total yield. <sup>1</sup>H NMR (400 MHz, CDCl<sub>3</sub>): δ 10.37 (s, 1H), 8.49 (s, 1H), 8.00 (d, *J* = 8.0 Hz, 1H), 7.91 (s, 1H), 7.76 (d, *J* = 8.0 Hz, 1H), 3.01 (s, 3H); <sup>13</sup>C NMR (100 MHz, CDCl<sub>3</sub>): δ 191.1, 158.6, 147.6, 141.2, 133.5, 132.7, 130.4, 128.6, 127.5, 126.7, 23.9; HRMS (EI) *m/z* calcd for C<sub>11</sub>H<sub>8</sub>ClNO (M) 205.0294, found 205.0296.

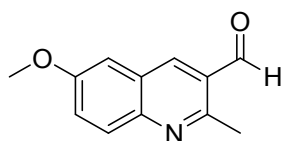

**6-Methoxy-2-methylquinoline-3-carbaldehyde (1d)**: pale yellow solid, 12% total

yield.  $^1\text{H}$  NMR (400 MHz,  $\text{CDCl}_3$ ):  $\delta$  10.31 (s, 1H), 8.47 (s, 1H), 7.79 (d,  $J = 8.0$  Hz, 1H), 7.37 (s, 1H), 7.21 (d,  $J = 8.0$  Hz, 1H), 3.98 (s, 3H), 3.00 (s, 3H);  $^{13}\text{C}$  NMR (100 MHz,  $\text{CDCl}_3$ ):  $\delta$  191.1, 163.5, 159.0, 151.3, 141.6, 130.2, 126.2, 121.2, 120.2, 106.9, 55.8, 23.8; HRMS (EI)  $m/z$  calcd for  $\text{C}_{12}\text{H}_{11}\text{NO}_2$  (M) 201.0790, found 201.0791.

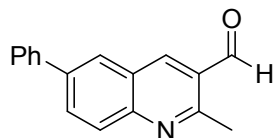

**2-Methyl-6-phenylquinoline-3-carbaldehyde (1e):** yellow solid, 16% total yield. The title compound was prepared from **1bd** and phenylboronic acid according to the above steps of **1bdd**, **1ae** and **1a**.  $^1\text{H}$  NMR (400 MHz,  $\text{CDCl}_3$ ):  $\delta$  10.41 (s, 1H), 8.65 (s, 1H), 8.09-8.16 (m, 3H), 7.71-7.72 (m, 2H), 7.50-7.54 (m, 2H), 7.41-7.45 (m, 1H), 3.06 (s, 3H);  $^{13}\text{C}$  NMR (100 MHz,  $\text{CDCl}_3$ ):  $\delta$  191.4, 158.3, 148.6, 142.6, 139.8, 139.7, 132.5, 129.2, 129.1, 128.4, 128.1, 127.4, 126.5, 126.3, 24.0; HRMS (EI)  $m/z$  calcd for  $\text{C}_{17}\text{H}_{13}\text{NO}$  (M) 247.0997, found 247.0998.

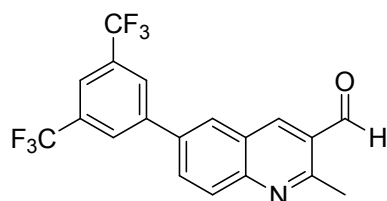

**6-(3,5-bis(trifluoromethyl)phenyl)-2-methylquinoline-3-carbaldehyde (1f):** yellow solid, 14% total yield. The title compound was prepared from **1bd** and 3,5-bis(trifluoromethyl)phenylboronic acid according to the above steps of **1bdd**, **1ae** and **1a**.  $^1\text{H}$  NMR (400 MHz,  $\text{CDCl}_3$ ):  $\delta$  10.42 (s, 1H), 8.70 (s, 1H), 8.08-8.23 (m, 5H), 7.94 (s, 1H), 3.08 (s, 3H);  $^{13}\text{C}$  NMR (100 MHz,  $\text{CDCl}_3$ ):  $\delta$  191.1, 159.4, 149.0, 142.5, 141.9, 136.7, 132.7, 132.4, 131.5, 130.1, 128.8, 127.4, 126.3, 124.6, 121.9, 121.7, 24.1; HRMS (EI)  $m/z$  calcd for  $\text{C}_{19}\text{H}_{11}\text{F}_6\text{NO}$  (M) 383.0745, found 383.0743.

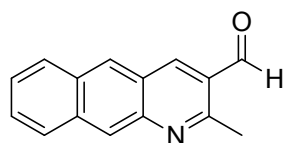

**2-Methylbenzo[g]quinoline-3-carbaldehyde (1g):** yellow solid, 4% total yield.  $^1\text{H}$  NMR (400 MHz,  $\text{CDCl}_3$ ):  $\delta$  10.36 (s, 1H), 8.77 (s, 1H), 8.63 (s, 1H), 8.55 (s, 1H), 8.09 (t,  $J = 8.0$  Hz, 2H), 7.55-7.63 (m, 2H), 3.07 (s, 3H);  $^{13}\text{C}$  NMR (100 MHz,  $\text{CDCl}_3$ ):  $\delta$  191.3, 158.3, 144.9, 144.5, 135.9, 131.9, 129.2, 128.6, 128.5, 128.1, 127.8, 126.6, 126.5, 124.3, 24.7; HRMS (EI)  $m/z$  calcd for  $\text{C}_{15}\text{H}_{11}\text{NO}$  (M) 221.0841, found 221.0842.

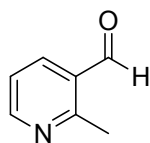

**2-Methylnicotinaldehyde (1h):** yellow oil, 42% total yield. The title compound was prepared from commercial availability ethyl 2-methylnicotinate, according to a simple procedure of **1ae** and **1a**. <sup>1</sup>H NMR (400 MHz, CDCl<sub>3</sub>): δ 10.34 (s, 1H), 8.69 (d, *J* = 8.0 Hz, 1H), 8.11 (d, *J* = 8.0 Hz, 1H), 7.34 (t, *J* = 8.0 Hz, 1H), 2.90 (s, 3H); <sup>13</sup>C NMR (100 MHz, CDCl<sub>3</sub>): δ 191.4, 160.3, 153.2, 138.3, 129.5, 121.8, 22.3; HRMS (EI) *m/z* calcd for C<sub>7</sub>H<sub>7</sub>NO (M) 121.0528, found 121.0529.

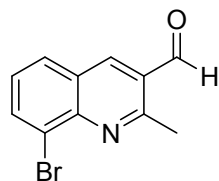

**8-Bromo-2-methylquinoline-3-carbaldehyde (1i):** white solid, 24% total yield. <sup>1</sup>H NMR (400 MHz, CDCl<sub>3</sub>): δ 10.41 (s, 1H), 8.57 (s, 1H), 8.15 (d, *J* = 8.0 Hz, 1H), 7.90 (d, *J* = 8.0 Hz, 1H), 7.43 (t, *J* = 8.0 Hz, 1H), 3.09 (s, 3H); <sup>13</sup>C NMR (100 MHz, CDCl<sub>3</sub>): δ 191.0, 159.5, 146.1, 142.4, 136.1, 128.9, 128.5, 127.4, 127.3, 124.4, 24.3; HRMS (EI) *m/z* calcd for C<sub>11</sub>H<sub>8</sub>BrNO (M) 248.9789, found 248.9787.

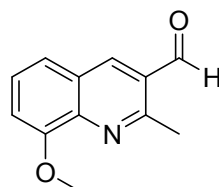

**8-Methoxy-2-methylquinoline-3-carbaldehyde (1j):** yellow solid, 27% total yield. <sup>1</sup>H NMR (400 MHz, CDCl<sub>3</sub>): δ 10.42 (s, 1H), 8.60 (s, 1H), 7.53 (d, *J* = 4.0 Hz, 2H), 7.21 (t, *J* = 4.0 Hz, 1H), 4.13 (s, 3H), 3.11 (s, 3H); <sup>13</sup>C NMR (100 MHz, CDCl<sub>3</sub>): δ 191.5, 157.4, 154.8, 141.1, 140.9, 128.4, 127.2, 127.1, 120.7, 110.7, 56.3, 24.2; HRMS (EI) *m/z* calcd for C<sub>12</sub>H<sub>11</sub>NO<sub>2</sub> (M) 201.0790, found 201.0788.

Unless otherwise noted, all compounds **2** were obtained commercially and used without further purification. Compound **2d** was prepared according to the literature methods.<sup>5</sup>

#### 4. General procedure for the synthesis of compound 2,3-dimethoxy-6,8,15,15a-tetrahydro-5H-benzo[b]isoquinolino[2,1-g][1,6]naphthyridine derivatives **3** and Characterization Data

Under N<sub>2</sub>, a mixture of **1a** (0.1 mmol) and catalyst **VII** (0.03 mmol) was stirred in toluene (1.0 mL) for 30 min at room temperature. Then 3 Å molecular sieves (50 mg), secondary amine **2a** (0.13 mmol) were added and the reaction was heated to 60 °C. After the reaction was completed (monitored by TLC), the mixture was cooled to room temperature, filtered, and washed with DCM. The combined organic phase was evaporated and purified by column chromatography (neutral alumina) to give the corresponding product **3a**.

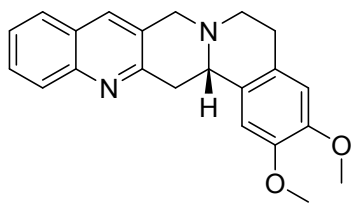

**(S)-2,3-Dimethoxy-6,8,15,15a-tetrahydro-5H-benzo[b]isoquinolino[2,1-g][1,6]naphthyridine (3a):** yellow solid, 91% yield.  $^1\text{H}$  NMR (400 MHz,  $\text{CDCl}_3$ ):  $\delta$  8.01 (d,  $J = 12.0$  Hz, 1H), 7.88 (s, 1H), 7.76 (d,  $J = 12.0$  Hz, 1H), 7.67 (t,  $J = 8.0$  Hz, 1H), 7.49 (t,  $J = 8.0$  Hz, 1H), 6.84 (s, 1H), 6.65 (s, 1H), 4.26 (d,  $J = 16.0$  Hz, 1H), 3.89 (s, 6H), 3.79-3.86 (m, 3H), 3.15-3.27 (m, 3H), 2.67-2.75 (m, 2H);  $^{13}\text{C}$  NMR (100 MHz,  $\text{CDCl}_3$ ):  $\delta$  156.5, 147.6, 147.5, 147.1, 132.7, 129.1, 129.0, 128.4, 128.2, 127.3, 127.0, 126.2, 126.0, 111.3, 108.2, 59.7, 58.0, 55.9, 55.8, 51.5, 40.9, 29.0; HRMS (EI)  $m/z$  calcd for  $\text{C}_{22}\text{H}_{22}\text{N}_2\text{O}_2$  (M) 346.1681, found 346.1679. (Chiralpak OD-3, *i*-PrOH/hexane = 20/80, flow rate = 1.0 mL/min,  $\lambda = 210$  nm):  $t_{\text{major}}$  = 15.14 min,  $t_{\text{minor}}$  = 21.69 min, e.r. = 86:14,  $[\alpha]_D^{25} = 19.2^\circ$  ( $c = 0.15$ ,  $\text{CH}_2\text{Cl}_2$ ).

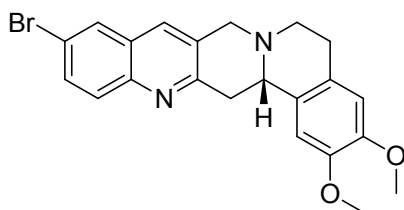

**(S)-11-Bromo-2,3-dimethoxy-6,8,15,15a-tetrahydro-5H-benzo[b]isoquinolino[2,1-g][1,6]naphthyridine (3b):** yellow solid, 88% yield.  $^1\text{H}$  NMR (400 MHz,  $\text{CDCl}_3$ ):  $\delta$  7.92 (s, 1H), 7.87 (d,  $J = 8.0$  Hz, 1H), 7.78 (s, 1H), 7.72 (d,  $J = 8.0$  Hz, 1H), 6.81 (s, 1H), 6.65 (s, 1H), 4.25 (d,  $J = 16.0$  Hz, 1H), 3.75-3.89 (m, 9H), 3.16-3.27 (m, 3H), 2.67-2.75 (m, 2H);  $^{13}\text{C}$  NMR (100 MHz,  $\text{CDCl}_3$ ):  $\delta$  157.1, 147.6, 146.6, 132.5, 131.6, 130.2, 129.3, 128.9, 128.1, 126.2, 119.7, 111.3, 108.2, 59.6, 57.8, 55.9, 55.9, 51.5, 40.9, 28.9; HRMS (EI)  $m/z$  calcd for  $\text{C}_{22}\text{H}_{21}\text{BrN}_2\text{O}_2$  (M) 424.0786, found 424.0779. (Chiralpak OD-3, *i*-PrOH/hexane = 20/80, flow rate = 1.0 mL/min,  $\lambda = 210$  nm):  $t_{\text{major}}$  = 15.91 min,  $t_{\text{minor}}$  = 24.12 min, e.r. = 90:10;  $[\alpha]_D^{25} = 5.3^\circ$  ( $c = 0.16$ ,  $\text{CH}_2\text{Cl}_2$ ).

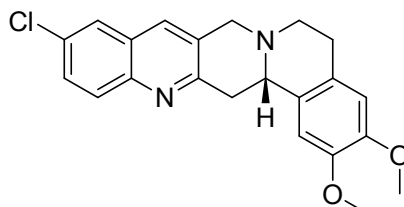

**(S)-11-Chloro-2,3-dimethoxy-6,8,15,15a-tetrahydro-5H-benzo[b]isoquinolino[2,1-g][1,6]naphthyridine (3c):** yellow solid, 41% yield.  $^1\text{H}$  NMR (400 MHz,  $\text{CDCl}_3$ ):  $\delta$  7.94 (d,  $J = 8.0$  Hz, 1H), 7.79 (s, 1H), 7.75 (s, 1H), 7.59 (d,  $J = 8.0$  Hz, 1H), 6.81 (s, 1H), 6.65 (s, 1H), 4.26 (d,  $J = 12.0$  Hz, 1H), 3.76-3.89 (m,

9H), 3.14-3.27 (m, 3H), 2.68-2.75 (m, 2H);  $^{13}\text{C}$  NMR (100 MHz,  $\text{CDCl}_3$ ):  $\delta$  157.0, 147.7, 145.4, 131.7, 131.6, 130.1, 130.0, 129.3, 128.9, 127.6, 126.2, 125.9, 111.28, 108.2, 59.6, 57.9, 55.9, 55.8, 51.5, 40.8, 29.0; HRMS (EI)  $m/z$  calcd for  $\text{C}_{22}\text{H}_{21}\text{ClN}_2\text{O}_2$  (M) 380.1292, found 4380.1284. (Chiralpak OD-3, *i*-PrOH/hexane = 20/80, flow rate  $\mathbf{B}$

= 1.0 mL/min,  $\lambda$  = 210 nm):  $t_{\text{major}}$  = 13.47 min,  $t_{\text{minor}}$  = 21.77 min, e.r. = 87:13;  $[\alpha]_D^{25}$  = 8.8° ( $c$  = 0.2,  $\text{CH}_2\text{Cl}_2$ ).

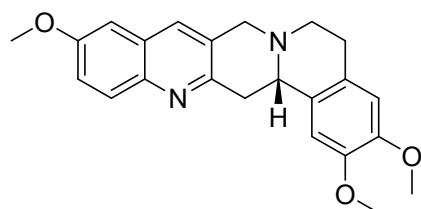

**(S)-2,3,11-Trimethoxy-6,8,15,15a-tetrahydro-5H-benzo[b]isoquinolino[2,1-g][1,6]naphthyridine (3d):** yellow solid, 86% yield.  $^1\text{H}$  NMR (400 MHz,  $\text{CDCl}_3$ ):  $\delta$  7.79 (s, 1H), 7.64 (d,  $J$  = 12.0 Hz, 1H), 7.35 (s, 1H), 7.15 (d,  $J$  = 8.0 Hz, 1H), 6.83 (s, 1H), 6.65 (s, 1H), 4.21 (d,  $J$  = 16.0 Hz, 1H), 3.74-3.98 (m, 12H), 3.16-3.25 (m, 3H), 2.66-2.75 (m, 2H);  $^{13}\text{C}$  NMR (100 MHz,  $\text{CDCl}_3$ ):  $\delta$  160.5, 156.4, 148.7, 147.6, 147.5, 132.5, 129.1, 128.3, 126.2, 125.9, 122.3, 119.3, 111.3, 108.2, 106.4, 59.7, 57.8, 55.9, 55.5, 51.5, 40.8, 29.0; HRMS (EI)  $m/z$  calcd for  $\text{C}_{23}\text{H}_{24}\text{N}_2\text{O}_3$  (M) 376.1787, found 376.1789. (Chiralpak OD-3, *i*-PrOH/hexane = 20/80, flow rate = 1.0 mL/min,  $\lambda$  = 220  $\mathbf{B}$

nm):  $t_{\text{major}}$  = 14.40 min,  $t_{\text{minor}}$  = 22.10 min, e.r. = 66:34;  $[\alpha]_D^{25}$  = 12.2° ( $c$  = 0.15,  $\text{CH}_2\text{Cl}_2$ ).

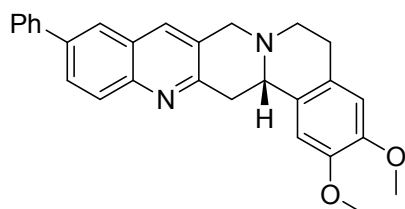

**(S)-2,3-Dimethoxy-11-phenyl-6,8,15,15a-tetrahydro-5H-benzo[b]isoquinolino[2,1-g][1,6]naphthyridine (3e):** yellow solid, 81% yield.  $^1\text{H}$  NMR (400 MHz,  $\text{CDCl}_3$ ):  $\delta$  8.08 (d,  $J$  = 8.0 Hz, 1H), 7.91-7.94 (m, 3H), 7.72 (d,  $J$  = 8.0 Hz, 2H), 7.50 (t,  $J$  = 8.0 Hz, 2H), 7.40 (t,  $J$  = 8.0 Hz, 1H), 6.84 (s, 1H), 6.65 (s, 1H), 4.28 (d,  $J$  = 16.0 Hz, 1H), 3.80-3.91 (m, 9H), 3.16-3.28 (m, 3H), 2.68-2.76 (m, 2H);  $^{13}\text{C}$  NMR (100 MHz,  $\text{CDCl}_3$ ):  $\delta$  156.5, 147.6, 147.5, 146.5, 140.5, 138.7, 132.8, 129.1, 129.0, 128.9, 128.8, 128.6, 127.6, 127.4, 127.2, 126.2, 125.0, 111.3, 108.2, 59.7, 58.0, 55.9, 55.8, 51.5, 40.9, 29.0; HRMS (EI)  $m/z$  calcd for  $\text{C}_{28}\text{H}_{26}\text{N}_2\text{O}_2$  (M) 422.1994, found 422.1995. (Chiralpak OD-3, *i*-PrOH/hexane = 20/80, flow rate = 1.0 mL/min,  $\lambda$  = 210  $\mathbf{B}$

nm):  $t_{\text{major}}$  = 19.84 min,  $t_{\text{minor}}$  = 29.97 min, e.r. = 76:24;  $[\alpha]_D^{25}$  = 21.8° ( $c$  = 0.2,  $\text{CH}_2\text{Cl}_2$ ).



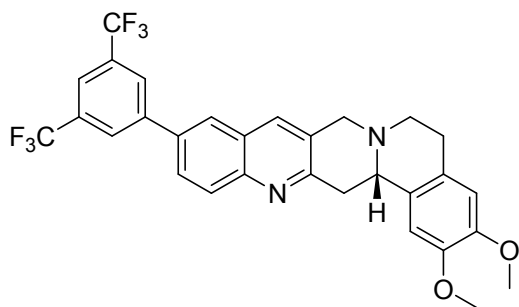

**(S)-11-(3,5-bis(Trifluoromethyl)phenyl)-2,3-dimethoxy-6,8,15,15a-tetrahydro-5H-benzo[b]isoquinolino[2,1-g][1,6]naphthyridine (3f):** yellow solid, 43% yield.  $^1\text{H}$  NMR (400 MHz,  $\text{CDCl}_3$ ):  $\delta$  8.15 (m, 3H), 7.99 (d,  $J$  = 8.0 Hz, 2H), 7.92 (d,  $J$  = 8.0 Hz, 2H), 6.84 (s, 1H), 6.66 (s, 1H), 4.31 (d,  $J$  = 16.0 Hz, 1H), 3.82-3.94 (m, 9H), 3.17-3.31 (m, 3H), 2.71-2.77 (m, 2H);  $^{13}\text{C}$  NMR (100 MHz,  $\text{CDCl}_3$ ):  $\delta$  157.8, 147.7, 146.9, 142.6, 135.6, 133.0, 132.5, 132.2, 129.7, 129.3, 128.8, 128.1, 127.4, 127.1, 126.2, 125.9, 124.7, 122.0, 121.2, 111.3, 108.2, 59.6, 57.9, 55.9, 55.8, 51.5, 41.0, 29.0; HRMS (EI)  $m/z$  calcd for  $\text{C}_{30}\text{H}_{24}\text{F}_6\text{N}_2\text{O}_2$  (M) 558.1742, found 558.1735. (Chiralpak OD-3, *i*-PrOH/hexane = 20/80, flow rate = 1.0 mL/min,  $\lambda$  = 210 nm):  $t_{\text{minor}}$  = 18.00 min,  $t_{\text{major}}$  = 22.70 min, e.r. = 88:12;  $[\alpha]_D^{25}$  = 44.7° ( $c$  = 0.15,  $\text{CH}_2\text{Cl}_2$ ).

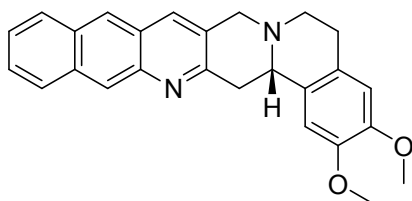

**(S)-2,3-Dimethoxy-6,8,17,17a-tetrahydro-5H-isoquinolino[2,1-g]naphtho[2,3-b][1,6]naphthyridine (3g):** yellow solid, 84% yield.  $^1\text{H}$  NMR (400 MHz,  $\text{CDCl}_3$ ):  $\delta$  8.60 (s, 1H), 8.35 (s, 1H), 8.00-8.07 (m, 3H), 7.50 (t,  $J$  = 4.0 Hz, 2H), 6.86 (s, 1H), 6.66 (s, 1H), 4.34 (d,  $J$  = 16.0 Hz, 1H), 3.87-3.96 (m, 9H), 3.19-3.32 (m, 3H), 2.71-2.77 (m, 2H);  $^{13}\text{C}$  NMR (100 MHz,  $\text{CDCl}_3$ ):  $\delta$  158.1, 147.7, 143.7, 133.8, 132.4, 131.6, 129.1, 128.5, 128.0, 127.9, 126.2, 126.1, 126.0, 125.9, 125.8, 125.7, 111.3, 108.3, 104.6, 59.8, 58.3, 56.0, 55.9, 51.6, 41.4, 29.0; HRMS (EI)  $m/z$  calcd for  $\text{C}_{26}\text{H}_{24}\text{N}_2\text{O}_2$  (M) 396.1838, found 396.1834. (Chiralpak OD-3, *i*-PrOH/hexane = 15/85, flow rate = 1.0 mL/min,  $\lambda$  = 254 nm):  $t_{\text{major}}$  = 32.55 min,  $t_{\text{minor}}$  = 50.00 min, e.r. = 92:8;  $[\alpha]_D^{25}$  = 6.6° ( $c$  = 0.2,  $\text{CH}_2\text{Cl}_2$ ).

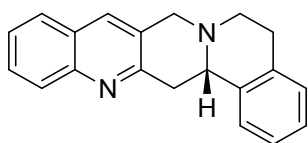

**(S)-6,8,15,15a-Tetrahydro-5H-benzo[b]isoquinolino[2,1-g][1,6]naphthyridine (3i):** yellow solid, 75% yield.  $^1\text{H}$  NMR (400 MHz,  $\text{CDCl}_3$ ):  $\delta$  8.02 (d,  $J$  = 8.0 Hz, 1H), 7.87 (s, 1H), 7.76 (d,  $J$  = 8.0 Hz, 1H), 7.66 (t,  $J$  = 8.0 Hz, 1H), 7.48 (t,  $J$  = 8.0 Hz, 1H), 7.36

(d,  $J = 8.0$  Hz, 1H), 7.17-7.28 (m, 3H), 4.26 (d,  $J = 16.0$  Hz, 1H), 3.81-3.91 (m, 3H), 3.21-3.30 (m, 3H), 2.72-2.85 (m, 2H);  $^{13}\text{C}$  NMR (100 MHz,  $\text{CDCl}_3$ ):  $\delta$  156.6, 147.1, 137.3, 134.2, 132.6, 129.0, 128.9, 128.5, 128.2, 127.2, 127.0, 126.4, 126.0, 125.6, 60.1, 58.0, 51.3, 40.7, 29.5; HRMS (EI)  $m/z$  calcd. for  $\text{C}_{20}\text{H}_{18}\text{N}_2$  (M) 286.1470, found 286.1469. (Chiralpak AD-3, *i*-PrOH/hexane = 20/80, flow rate = 1.0 mL/min,  $\lambda = 210$  nm):  $t_{\text{minor}} = 8.49$  min,  $t_{\text{major}} = 12.36$  min, e.r. = 73:27;  $[\alpha]_D^{25} = -25.7^\circ$  ( $c = 0.15$ ,  $\text{CH}_2\text{Cl}_2$ ).

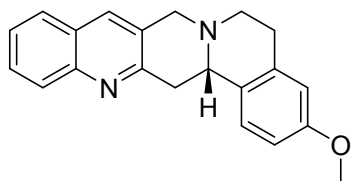

**(S)-3-Methoxy-6,8,15,15a-tetrahydro-5H-benzo[b]isoquinolino[2,1-g][1,6]naphthyridine (3j):** yellow solid, 84% yield.  $^1\text{H}$  NMR (400 MHz,  $\text{CDCl}_3$ ):  $\delta$  8.01 (d,  $J = 8.0$  Hz, 1H), 7.86 (s, 1H), 7.76 (d,  $J = 8.0$  Hz, 1H), 7.66 (t,  $J = 8.0$  Hz, 1H), 7.48 (t,  $J = 8.0$  Hz, 1H), 7.26-7.28 (m, 1H), 6.83 (d,  $J = 8.0$  Hz, 1H), 6.70 (s, 1H), 4.25 (d,  $J = 16.0$  Hz, 1H), 3.78-3.90 (m, 6H), 3.17-3.27 (m, 3H), 2.67-2.81 (m, 2H);  $^{13}\text{C}$  NMR (100 MHz,  $\text{CDCl}_3$ ):  $\delta$  157.9, 156.6, 147.1, 135.5, 132.6, 129.6, 129.0, 128.5, 128.2, 127.2, 127.0, 126.6, 125.9, 113.3, 112.6, 59.7, 58.0, 55.3, 51.3, 40.9, 29.7; HRMS (EI)  $m/z$  calcd for  $\text{C}_{21}\text{H}_{20}\text{N}_2\text{O}$  (M) 316.1576, found 316.1583. (Chiralpak AD-3, *i*-PrOH/hexane = 20/80, flow rate = 1.0 mL/min,  $\lambda = 210$  nm):  $t_{\text{minor}} = 11.94$  min,  $t_{\text{major}} = 23.58$  min, e.r. = 76:24;  $[\alpha]_D^{25} = 32.9^\circ$  ( $c = 0.2$ ,  $\text{CH}_2\text{Cl}_2$ ).

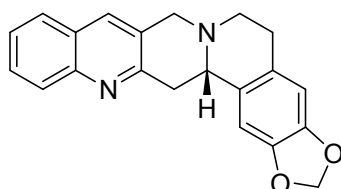

**(S)-6,8,15,15a-Tetrahydro-5H-[1,3]dioxolo[4',5':6,7]isoquinolino[2,1-g]benzo[b][1,6]naphthyridine (3k):** yellow solid, 82% yield.  $^1\text{H}$  NMR (400 MHz,  $\text{CDCl}_3$ ):  $\delta$  7.94 (d,  $J = 8.0$  Hz, 1H), 7.79 (s, 1H), 7.68 (d,  $J = 8.0$  Hz, 1H), 7.58 (t,  $J = 8.0$  Hz, 1H), 7.41 (t,  $J = 8.0$  Hz, 1H), 6.73 (s, 1H), 6.54 (s, 1H), 5.87 (s, 2H), 4.16 (d,  $J = 16.0$  Hz, 1H), 3.63-3.81 (m, 3H), 3.05-3.15 (m, 3H), 2.57-2.65 (m, 2H);  $^{13}\text{C}$  NMR (100 MHz,  $\text{CDCl}_3$ ):  $\delta$  156.4, 147.1, 146.4, 146.2, 132.6, 130.2, 129.1, 128.4, 128.1, 127.4, 127.2, 127.0, 126.0, 108.4, 105.5, 100.9, 60.0, 57.9, 51.3, 40.9, 29.5; HRMS (EI)  $m/z$  calcd for  $\text{C}_{21}\text{H}_{18}\text{N}_2\text{O}_2$  (M) 330.1368, found 330.1364. (Chiralpak AD-3, *i*-PrOH/hexane = 20/80, flow rate = 1.0 mL/min,  $\lambda = 210$  nm):  $t_{\text{minor}} = 12.73$  min,  $t_{\text{major}} = 24.99$  min, e.r. = 71:29;  $[\alpha]_D^{25} = -30.7^\circ$  ( $c = 0.2$ ,  $\text{CH}_2\text{Cl}_2$ ).

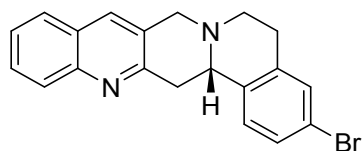

**(S)-3-Bromo-6,8,15,15a-tetrahydro-5H-benzo[b]isoquinolino[2,1-g][1,6]naphthyridine (3l):** yellow solid, 55% yield.  $^1\text{H}$  NMR (400 MHz,  $\text{CDCl}_3$ ):  $\delta$  8.01 (d,  $J = 8.0$  Hz, 1H), 7.86 (s, 1H), 7.76 (d,  $J = 8.0$  Hz, 1H), 7.66 (t,  $J = 8.0$  Hz, 1H), 7.49 (t,  $J = 8.0$  Hz, 1H), 7.37 (d,  $J = 8.0$  Hz, 1H), 7.32 (s, 1H), 7.21 (d,  $J = 8.0$  Hz, 1H), 4.24 (d,  $J = 16.0$  Hz, 1H), 3.75-3.90 (m, 3H), 3.17-3.23 (m, 3H), 2.64-2.80 (m, 2H);  $^{13}\text{C}$  NMR (100 MHz,  $\text{CDCl}_3$ ):  $\delta$  156.1, 147.1, 136.6, 136.4, 132.7, 131.6, 129.5, 129.2, 128.4, 128.0, 127.3, 127.2, 127.0, 126.1, 120.2, 59.7, 57.8, 50.9, 40.5, 29.3; HRMS (EI)  $m/z$  calcd for  $\text{C}_{20}\text{H}_{17}\text{BrN}_2$  (M) 364.0575, found 364.0571. (Chiralpak AD-3, *i*-PrOH/hexane = 20/80, flow rate = 1.0 mL/min,  $\lambda = 210$  nm):  $t_{\text{minor}} = 11.26$  min,  $t_{\text{major}} = 18.33$  min, e.r. = 62:38;  $[\alpha]_D^{25} = 23.5^\circ$  ( $c = 0.15$ ,  $\text{CH}_2\text{Cl}_2$ ).

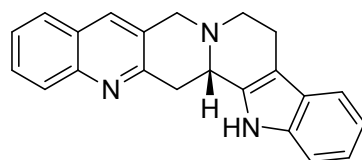

**(S)-5,6,8,15,15a,16-Hexahydrobenzo[b]indolo[2',3':3,4]pyrido[1,2-g][1,6]naphthyridine (3m):** yellow solid, 62% yield.  $^1\text{H}$  NMR (400 MHz,  $\text{CDCl}_3$ ):  $\delta$  8.01 (d,  $J = 8.0$  Hz, 1H), 7.91 (s, 1H), 7.78 (d,  $J = 8.0$  Hz, 1H), 7.67 (t,  $J = 8.0$  Hz, 1H), 7.49-7.56 (m, 2H), 7.37 (d,  $J = 8.0$  Hz, 1H), 7.12-7.21 (m, 2H), 4.35 (d,  $J = 16.0$  Hz, 1H), 3.96-4.00 (m, 2H), 3.67 (d,  $J = 16.0$  Hz, 1H), 3.32-3.41 (m, 2H), 3.08-3.11 (m, 1H), 2.81-2.91 (m, 2H);  $^{13}\text{C}$  NMR (100 MHz,  $\text{CDCl}_3$ ):  $\delta$  155.4, 146.9, 136.5, 133.8, 133.2, 129.3, 128.3, 128.2, 127.3, 127.1, 127.0, 126.2, 121.8, 119.5, 118.2, 111.1, 108.5, 57.2, 56.5, 52.3, 38.7, 21.5; HRMS (EI)  $m/z$  calcd for  $\text{C}_{22}\text{H}_{19}\text{N}_3$  (M) 325.1579, found 325.1577. (Chiralpak AD-3, *i*-PrOH/hexane = 20/80, flow rate = 1.0 mL/min,  $\lambda = 210$  nm):  $t_{\text{minor}} = 14.19$  min,  $t_{\text{major}} = 22.38$  min, e.r. = 63:37;  $[\alpha]_D^{25} = 54.1^\circ$  ( $c = 0.17$ ,  $\text{CH}_2\text{Cl}_2$ ).

## 5. Determination of X-ray crystallographic structure 3b

The data were collected on an Agilent Technologies Gemini Atlas Ultra diffractometer using a ultra Cu radiation ( $\lambda = 1.54184 \text{ \AA}$ ) with collimating mirror monochromators and at 293 K. Data collection, unit cell refinement and data reduction were performed using Agilent Technologies CrysAlisPro V 1.171.35.11.1 The structure was solved by direct methods and refined by full-matrix least-squares on F2 with anisotropic displacement parameters for the non-H atoms using Olex2/ SHELXTL program package.<sup>2</sup> The hydrogen atoms on carbon were calculated in ideal positions with isotropic displacement parameters set to 1.2xUeq of the attached atom (1.5xUeq for methyl hydrogen atoms). The hydrogen atoms bound to nitrogen were located in a  $\Delta F$  map and

refined with isotropic displacement parameters.

1. CrysAlisPro, Agilent Technologies, Version 1.171.35.11 (release 16-05-2011 CrysAlis171 .NET) (compiled May 16 2011, 17:55:39) Empirical absorption correction using spherical harmonics, implemented in SCALE3 ABSPACK scaling algorithm.
2. Dolomanov, O. V., Bourhis, L. J., Gildea, R. J., Howard, J. A. K. & Puschmann, H. *J. Appl. Cryst.* **2009**, *42*, 339-341.

## checkCIF/PLATON report

Structure factors have been supplied for datablock(s) t\_0m\_a

THIS REPORT IS FOR GUIDANCE ONLY. IF USED AS PART OF A REVIEW PROCEDURE FOR PUBLICATION, IT SHOULD NOT REPLACE THE EXPERTISE OF AN EXPERIENCED CRYSTALLOGRAPHIC REFEREE.

No syntax errors found.

[CIF dictionary](#)

[Interpreting this report](#)

### Datablock: t\_0m\_a

---

Bond precision: C-C = 0.0050 A

Wavelength=1.54178

Cell: a=9.1340(3) b=10.0111(4) c=11.6697(4)  
alpha=66.936(2) beta=86.111(2) gamma=76.562(2)  
Temperature: 301 K

|                | Calculated       | Reported         |
|----------------|------------------|------------------|
| Volume         | 954.60(6)        | 954.60(6)        |
| Space group    | P -1             | P -1             |
| Hall group     | -P 1             | -P 1             |
| Moiety formula | C22 H21 Br N2 O2 | C22 H21 Br N2 O2 |
| Sum formula    | C22 H21 Br N2 O2 | C22 H21 Br N2 O2 |
| Mr             | 425.31           | 425.32           |
| Dx, g cm-3     | 1.480            | 1.480            |
| Z              | 2                | 2                |
| Mu (mm-1)      | 3.089            | 3.089            |
| F000           | 436.0            | 436.0            |
| F000'          | 435.70           |                  |
| h,k,lmax       | 11,12,14         | 11,12,14         |
| Nref           | 3487             | 3426             |
| Tmin,Tmax      | 0.566,0.539      |                  |
| Tmin'          | 0.513            |                  |

Correction method= Not given

Data completeness= 0.983

Theta(max)= 68.291

R(reflections)= 0.0451( 2646)

wR2(reflections)= 0.1247( 3426)

S = 1.006

Npar= 246

---

The following ALERTS were generated. Each ALERT has the format

**test-name\_ALERT\_alert-type\_alert-level.**

Click on the hyperlinks for more details of the test.

---

### Alert level C

|                   |                                                 |             |
|-------------------|-------------------------------------------------|-------------|
| PLAT052 ALERT 1 C | Info on Absorption Correction Method Not Given  | Please Do ! |
| PLAT906 ALERT 3 C | Large K value in the Analysis of Variance ..... | 2.805 Check |
| PLAT911 ALERT 3 C | Missing # FCF Refl Between THmin & STh/L= 0.600 | 55 Report   |

### Alert level G

|                   |                                                  |              |
|-------------------|--------------------------------------------------|--------------|
| PLAT154 ALERT 1 G | The s.u.'s on the Cell Angles are Equal ..(Note) | 0.002 Degree |
| PLAT793 ALERT 4 G | The Model has Chirality at C11 (Centro SPGR)     | S Verify     |
| PLAT912 ALERT 4 G | Missing # of FCF Reflections Above STh/L= 0.600  | 7 Note       |
| PLAT913 ALERT 3 G | Missing # of Very Strong Reflections in FCF .... | 1 Note       |
| PLAT978 ALERT 2 G | Number C-C Bonds with Positive Residual Density  | 6 Note       |

- 
- 0 **ALERT level A** = Most likely a serious problem - resolve or explain  
0 **ALERT level B** = A potentially serious problem, consider carefully  
3 **ALERT level C** = Check. Ensure it is not caused by an omission or oversight  
5 **ALERT level G** = General information/check it is not something unexpected

- 2 ALERT type 1 CIF construction/syntax error, inconsistent or missing data  
1 ALERT type 2 Indicator that the structure model may be wrong or deficient  
3 ALERT type 3 Indicator that the structure quality may be low  
2 ALERT type 4 Improvement, methodology, query or suggestion  
0 ALERT type 5 Informative message, check
- 

It is advisable to attempt to resolve as many as possible of the alerts in all categories. Often the minor alerts point to easily fixed oversights, errors and omissions in your CIF or refinement strategy, so attention to these fine details can be worthwhile. In order to resolve some of the more serious problems it may be necessary to carry out additional measurements or structure refinements. However, the purpose of your study may justify the reported deviations and the more serious of these should normally be commented upon in the discussion or experimental section of a paper or in the "special\_details" fields of the CIF. checkCIF was carefully designed to identify outliers and unusual parameters, but every test has its limitations and alerts that are not important in a particular case may appear. Conversely, the absence of alerts does not guarantee there are no aspects of the results needing attention. It is up to the individual to critically assess their own results and, if necessary, seek expert advice.

### Publication of your CIF in IUCr journals

A basic structural check has been run on your CIF. These basic checks will be run on all CIFs submitted for publication in IUCr journals (*Acta Crystallographica*, *Journal of Applied Crystallography*, *Journal of Synchrotron Radiation*); however, if you intend to submit to *Acta Crystallographica Section C* or *E* or *IUCrData*, you should make sure that full publication checks are run on the final version of your CIF prior to submission.

### Publication of your CIF in other journals

Please refer to the *Notes for Authors* of the relevant journal for any special instructions relating to CIF submission.

---

PLATON version of 11/08/2016; check.def file version of 04/08/2016



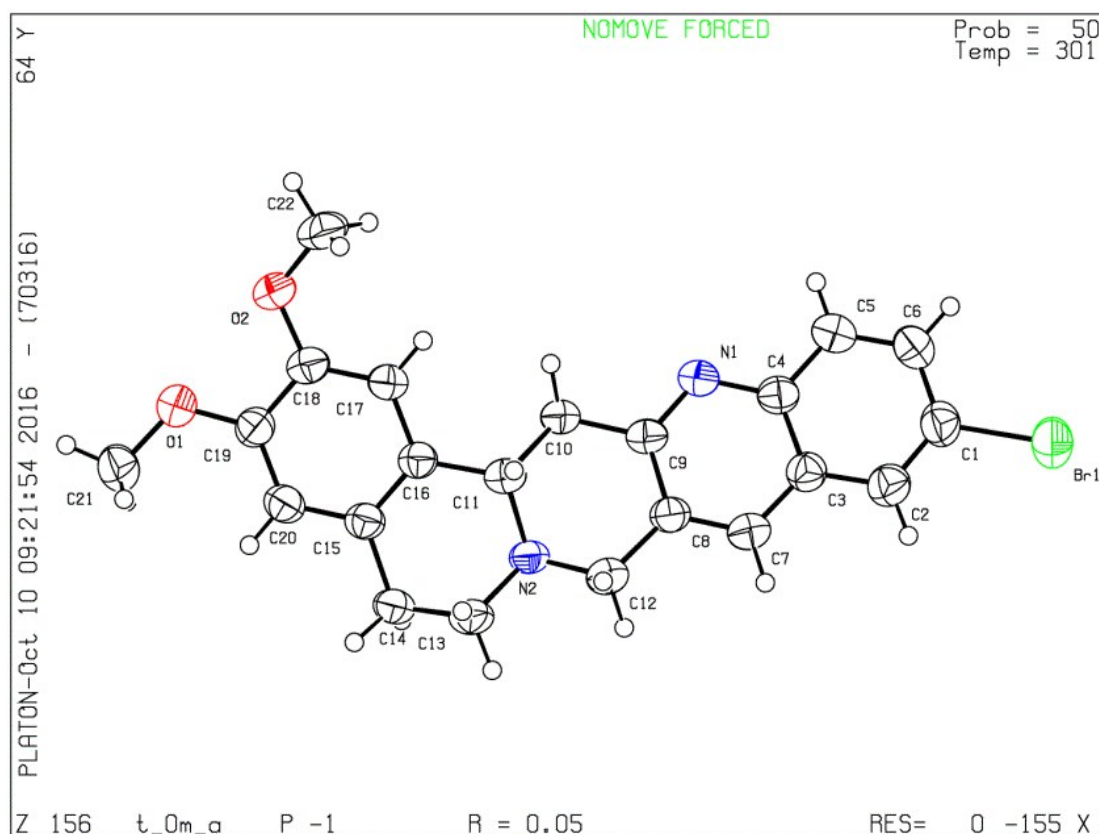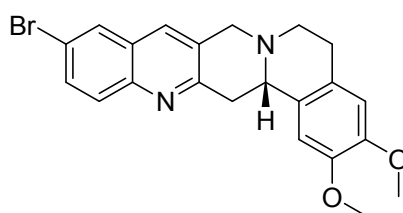

**Fig S1.** The X-ray crystallographic structure of compound **3b**

## 6. References

- [1] (a) He, H.; Chen, L. Y.; Wong, W. Y.; Chan, W. H.; Lee, A. W. M. *Eur. J. Org. Chem.* **2010**, 4181-4184. (b) Hisashi Morita; Junji Itoh; Kohei Fuchibe; Takahiko Akiyama *Org. Lett.*, **2005**, 7, 2583-2585. (c) Boris J. Nachtsheim; Rene M. Koenigs; Winai Ieawsuwan; Magnus Rueping *Chem. Eur. J.* **2010**, 16, 13116-13126. (d) Berkessel, A.; Christ, P.; Leconte, N.; Neudörfl, J. M.; Schafer, M. *Eur. J. Org. Chem.* **2010**, 5165-5170. (e) Shengjun Ni; Veluru Ramesh Naidu; Johan Franzén *Eur. J. Org. Chem.* **2016**, 1708-1713. (f) Jia-Hui Tay; Alonso J. Arguelles; Pavel Nagorny *Org. Lett.*, **2015**, 17, 3774-3777. (g) Mahlau, M.; García-García, P.; List, B. *Chem.-Eur. J.* **2012**, 18, 16283-16287. (h) Qinggang Wang; Markus Leutzsch; Manuel van Gemmeren; Benjamin List *J. Am. Chem. Soc.* **2013**, 135, 15334-15337.
- [2] Jia, M. Q.; You, S. L. *ACS Catal.* **2013**, 3, 622-624.
- [3] Matteo Chiurato; Rajaa Boulahjar; Sylvain Routier; Yves Troin; Gérald Guillaumet *Tetrahedron*, **2010**, 66, 4647-4653.
- [4] Shen Q.; Yu J. J.; Liu, M. T.; Qiu J.; Fang L.; Guo F. L.; Tang J.; Wang, L. M

*Synthesis*, **2012**, 44, 389-392

[5] Kaliyamoorthy Alagiri, Kandikere Ramaiah Prabhu *Org. Biomol. Chem.*, **2012**, 10, 835-842.

## 7. $^1\text{H}$ and $^{13}\text{C}$ -NMR spectra



**(R)-(-)-3,3'-bis(3,5-Diphenylphenyl)-1,1'-Binaphthalene-2,2'-sulfonimide (VII)**

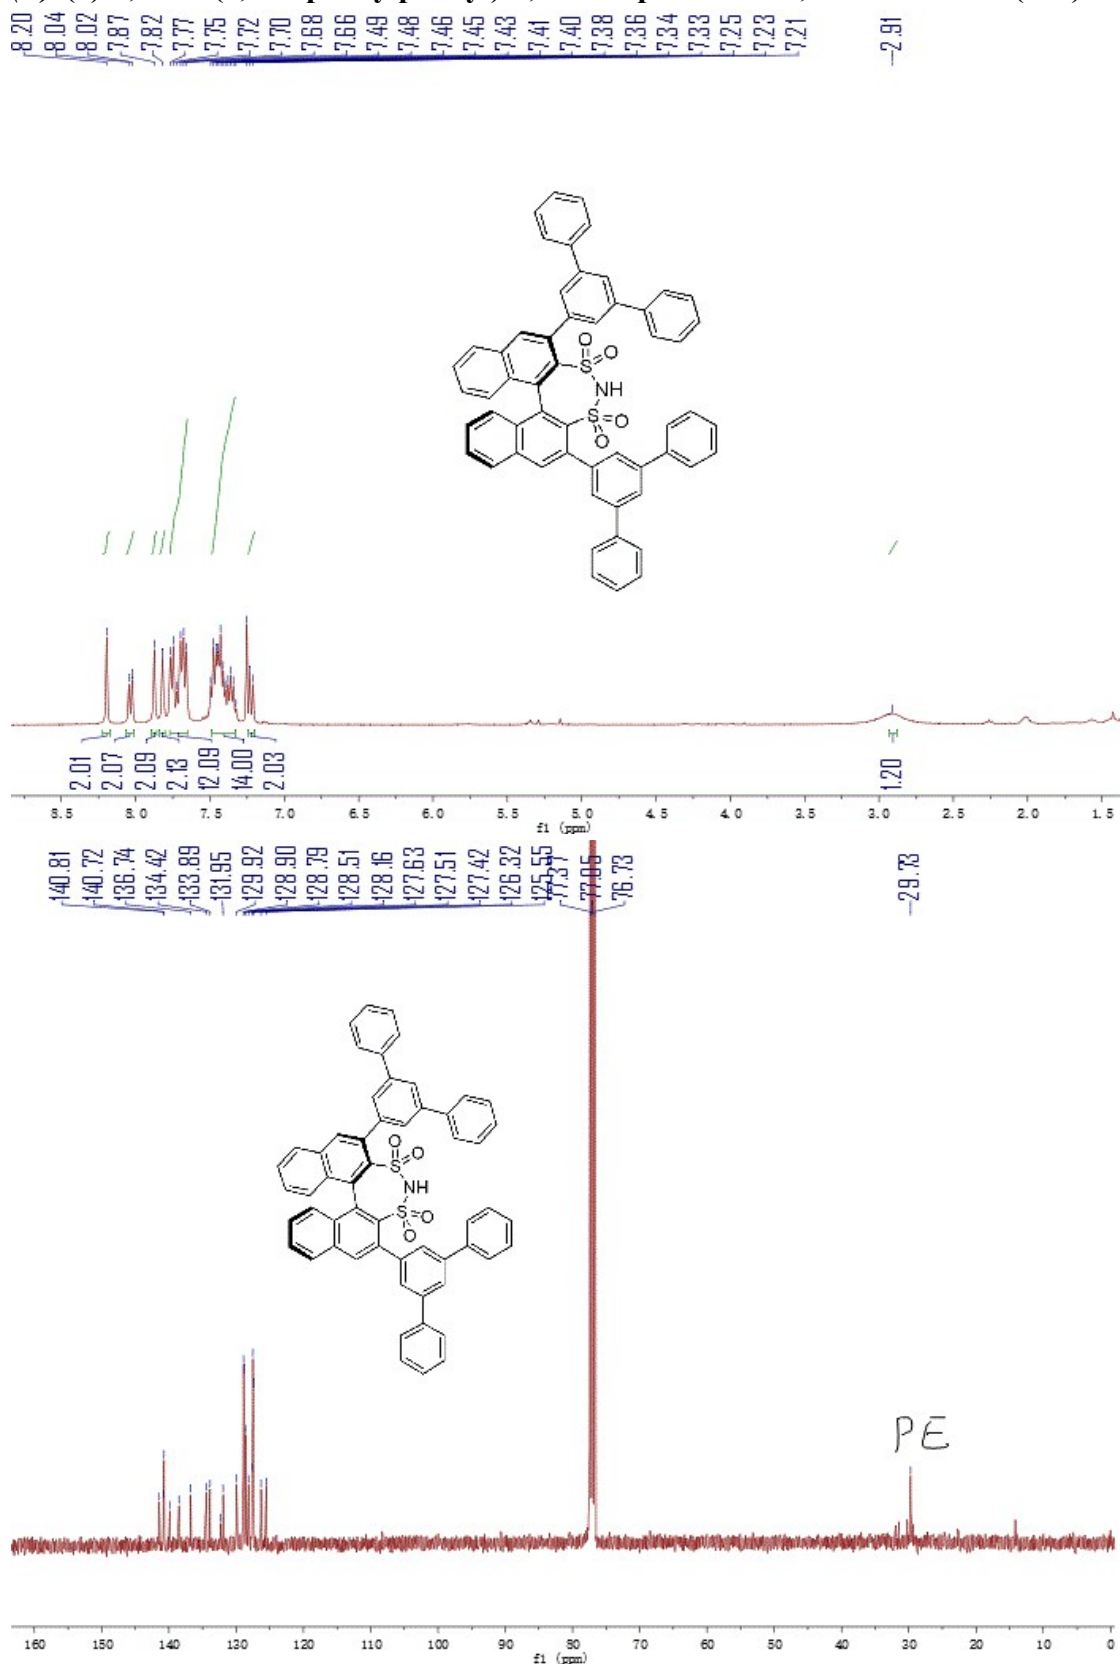

**2-Methylquinolin-3-carbaldehyde (1a)**

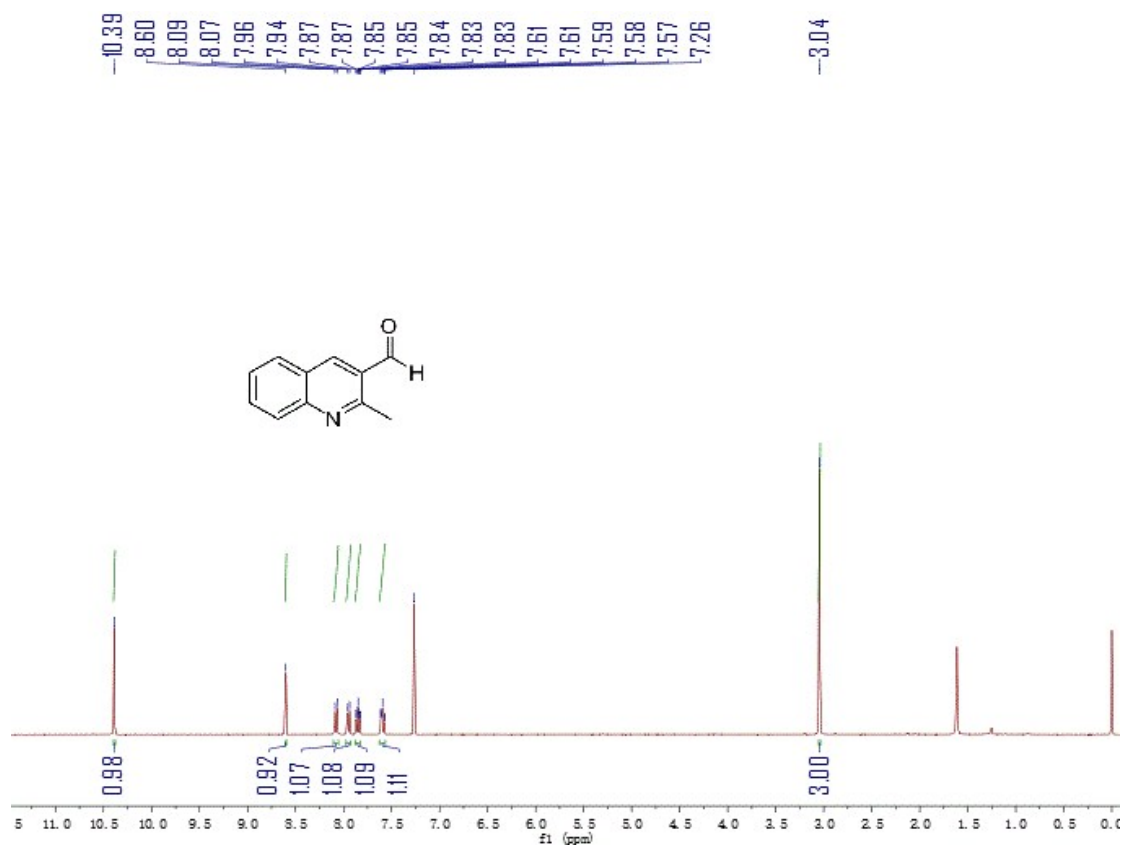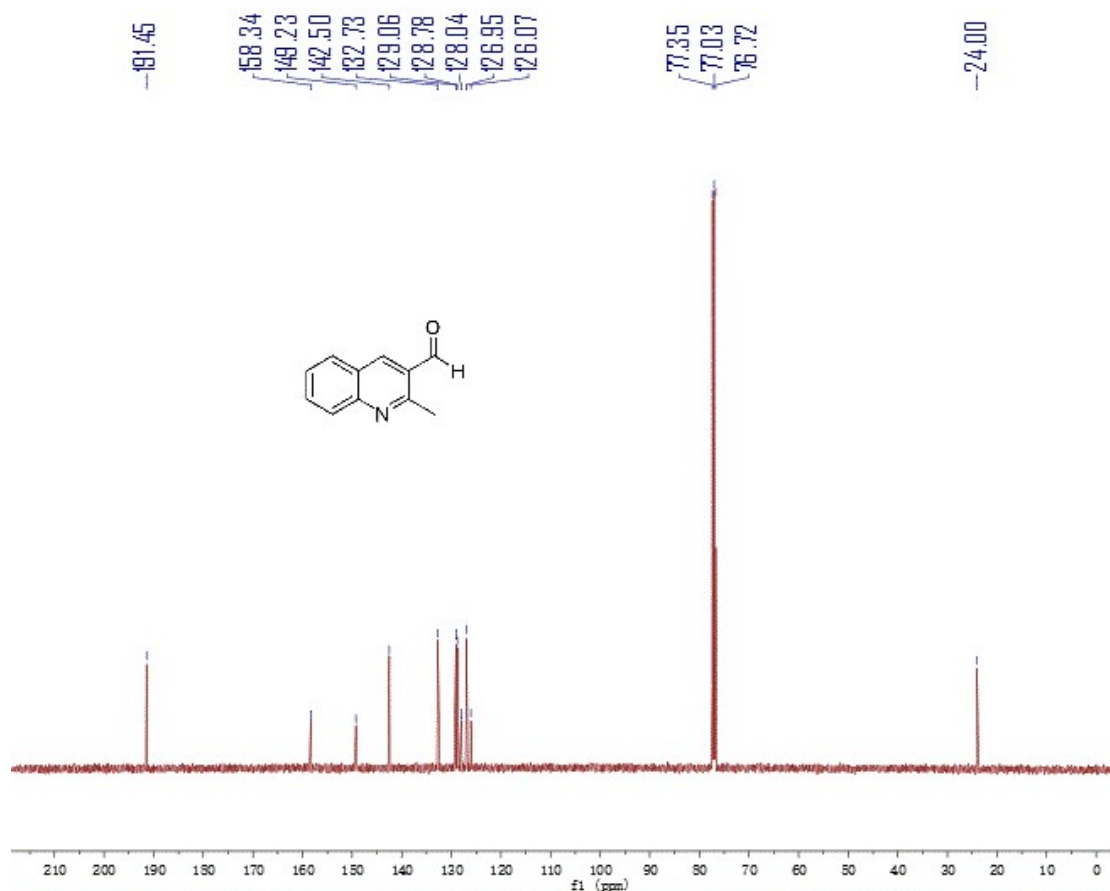

**6-Bromo-2-methylquinoline-3-carbaldehyde (1b)**

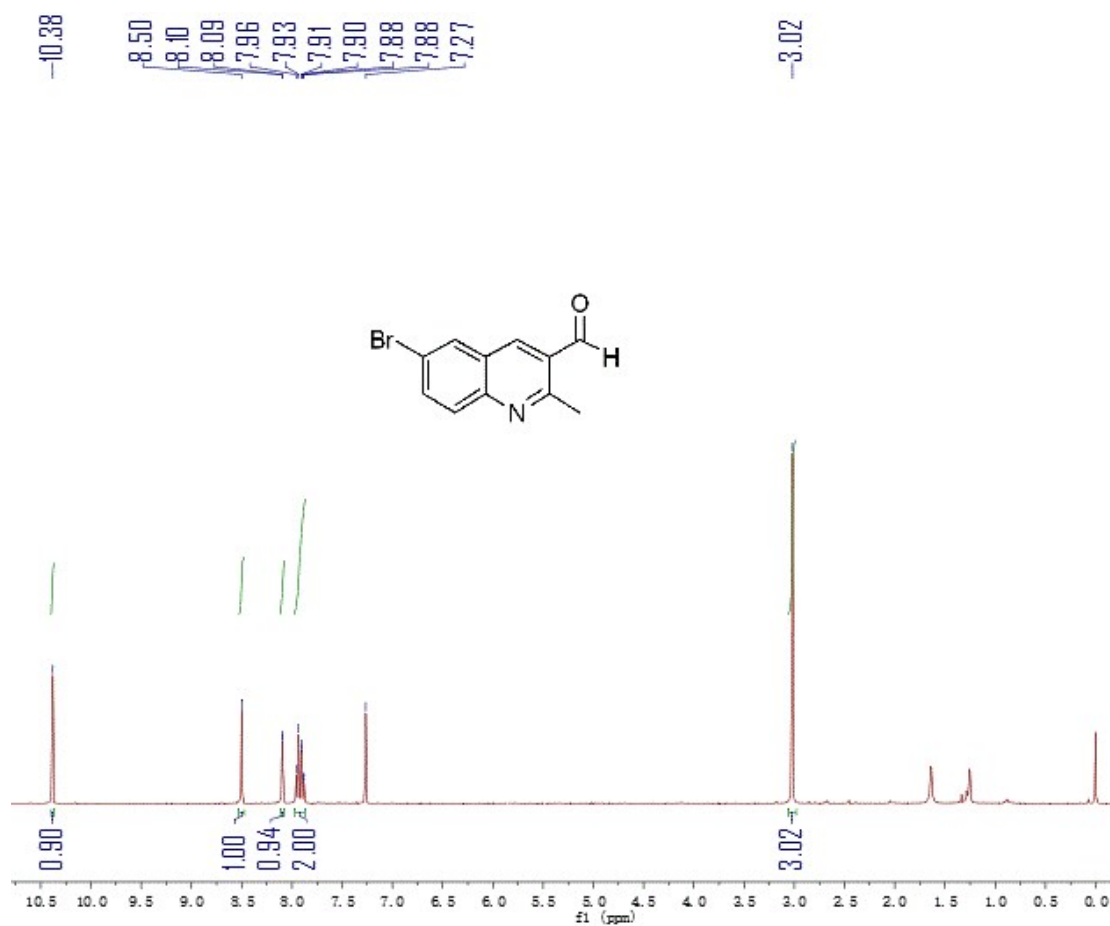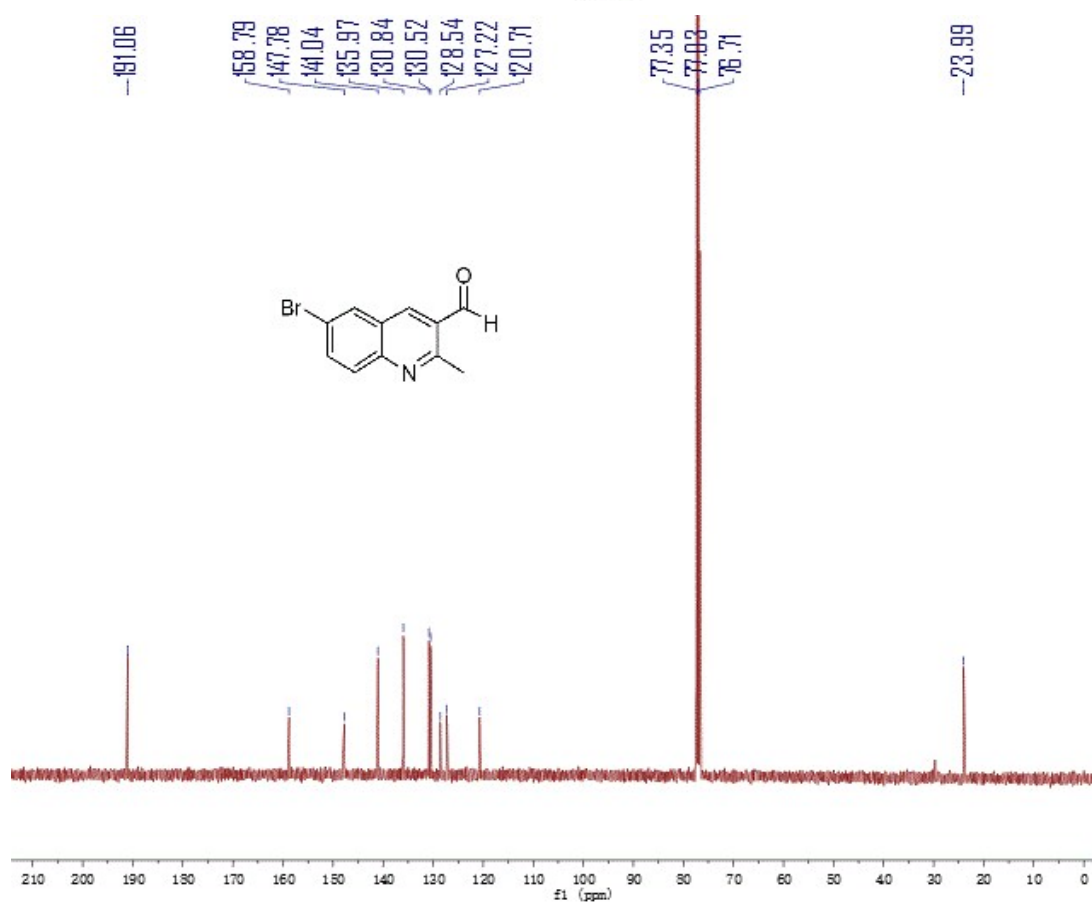

**6-Chloro-2-methylquinoline-3-carbaldehyde (1c)**

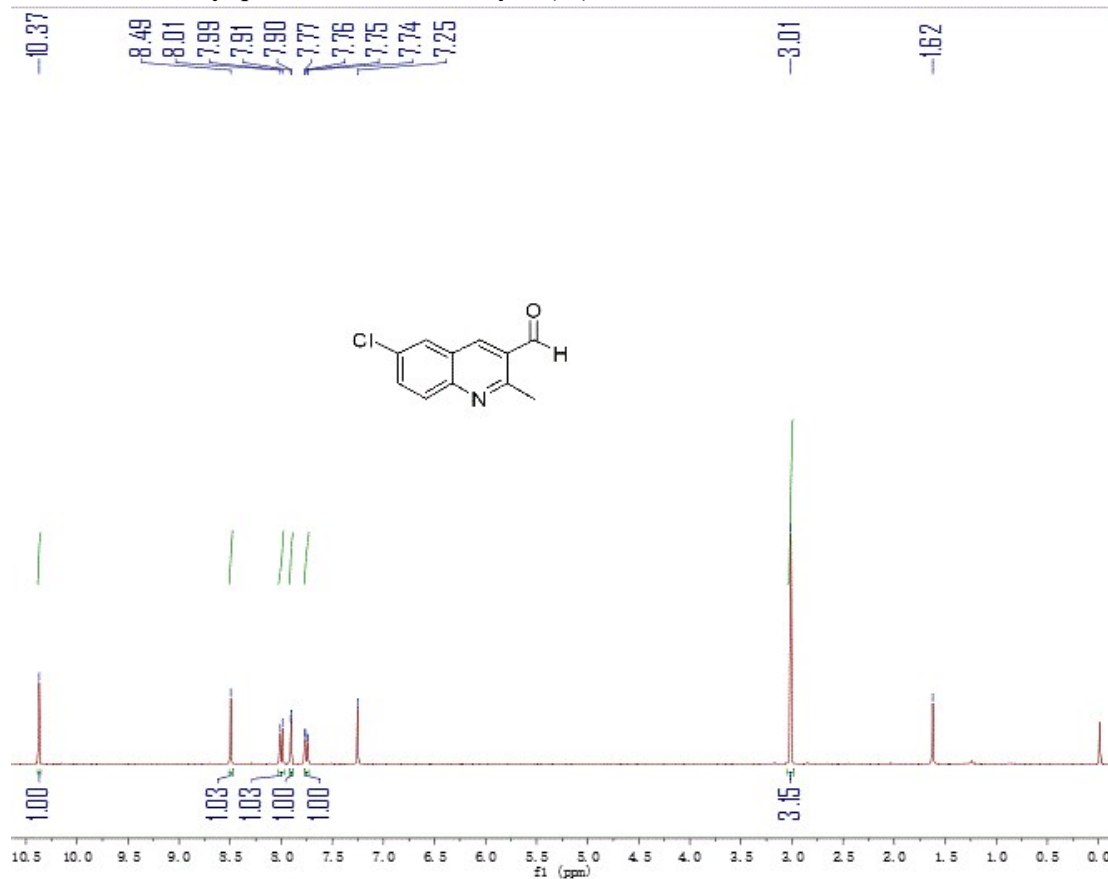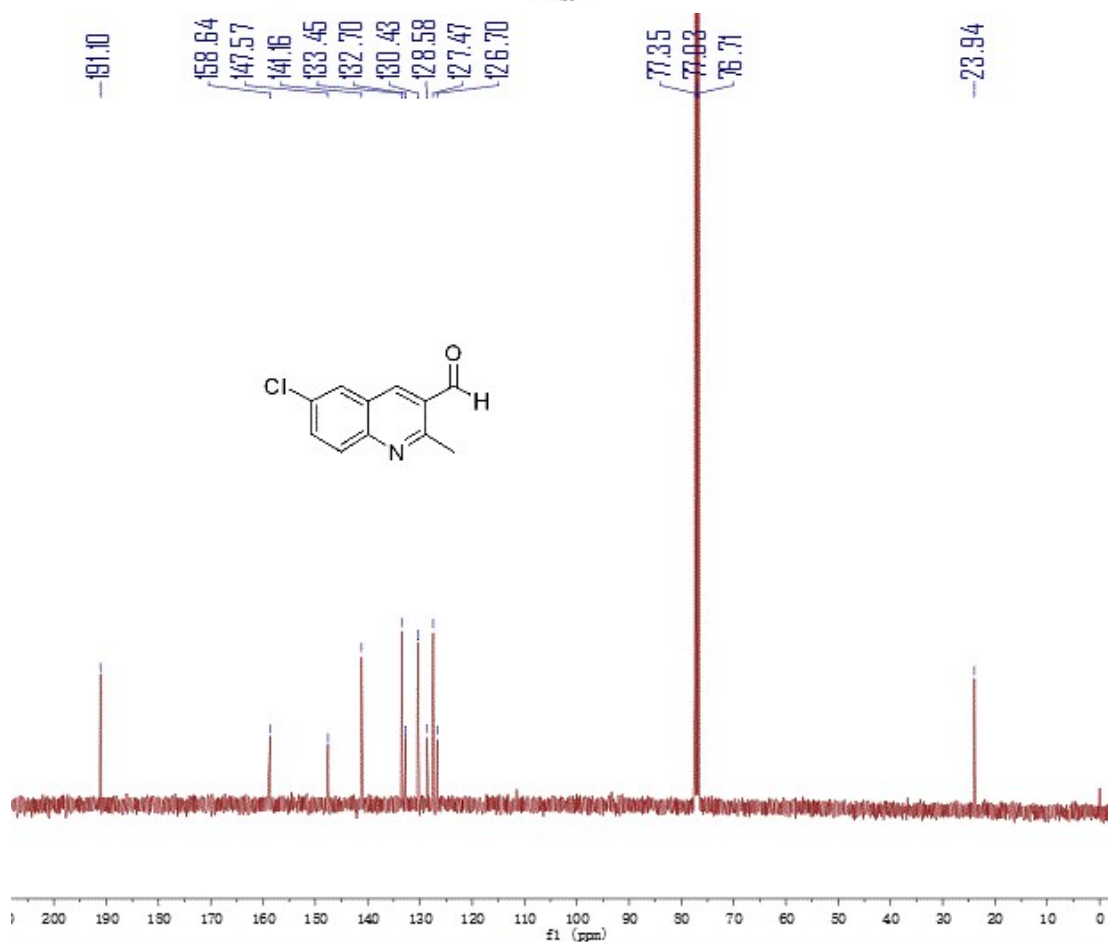

6-Methoxy-2-methylquinoline-3-carbaldehyde (1d)

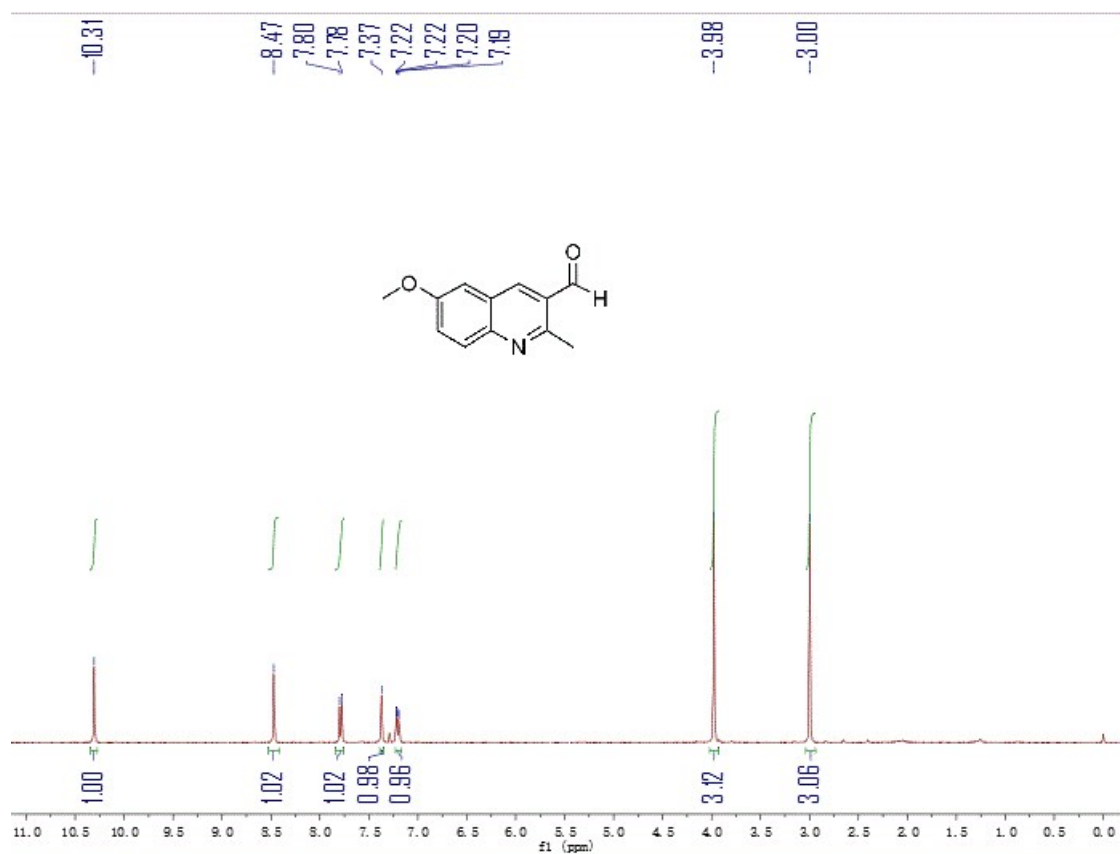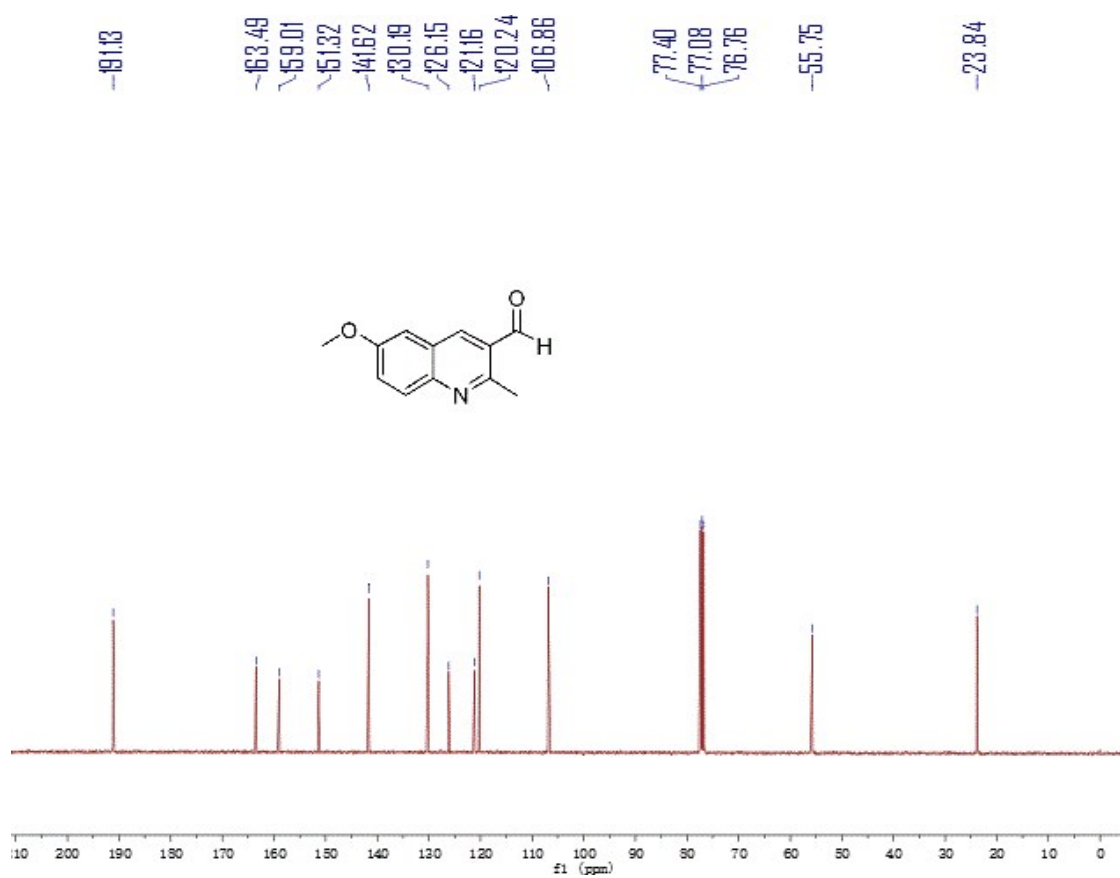

**2-Methyl-6-phenylquinoline-3-carbaldehyde (1e)**

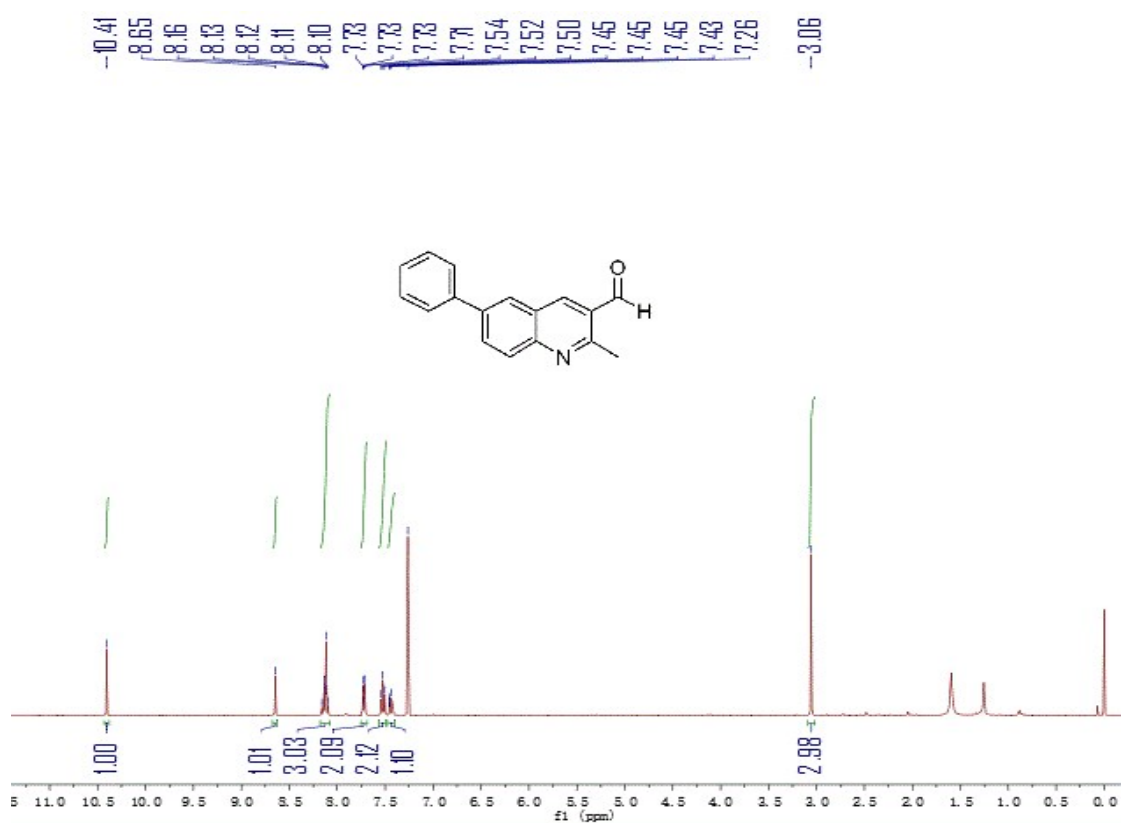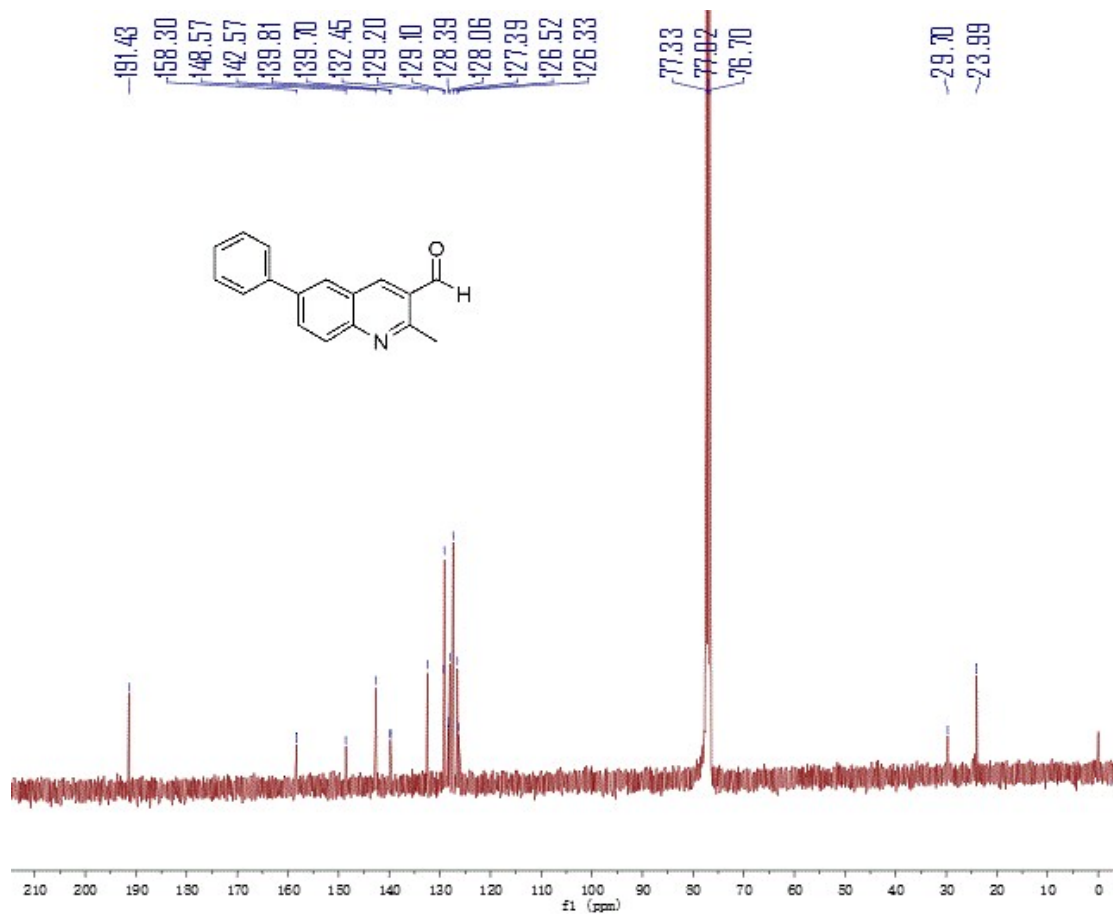

**6-(3,5-bis(Trifluoromethyl)phenyl)-2-methylquinoline-3-carbaldehyde (1f)**

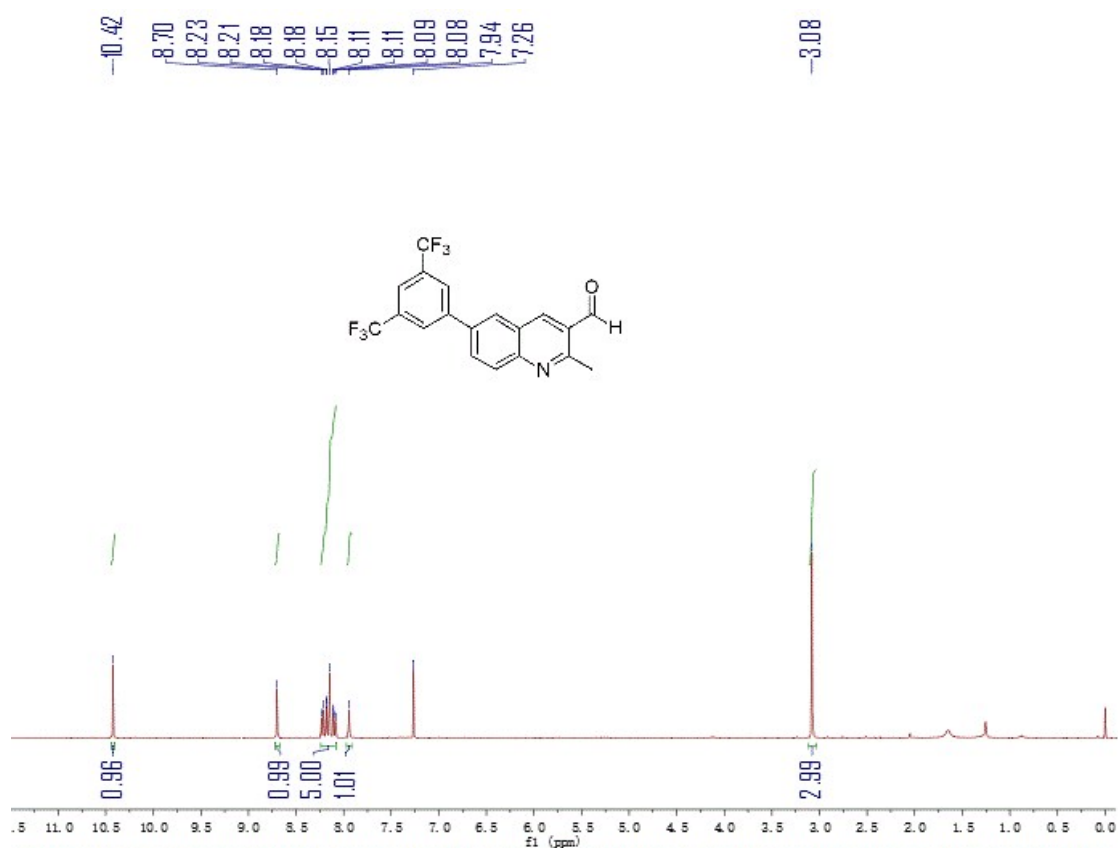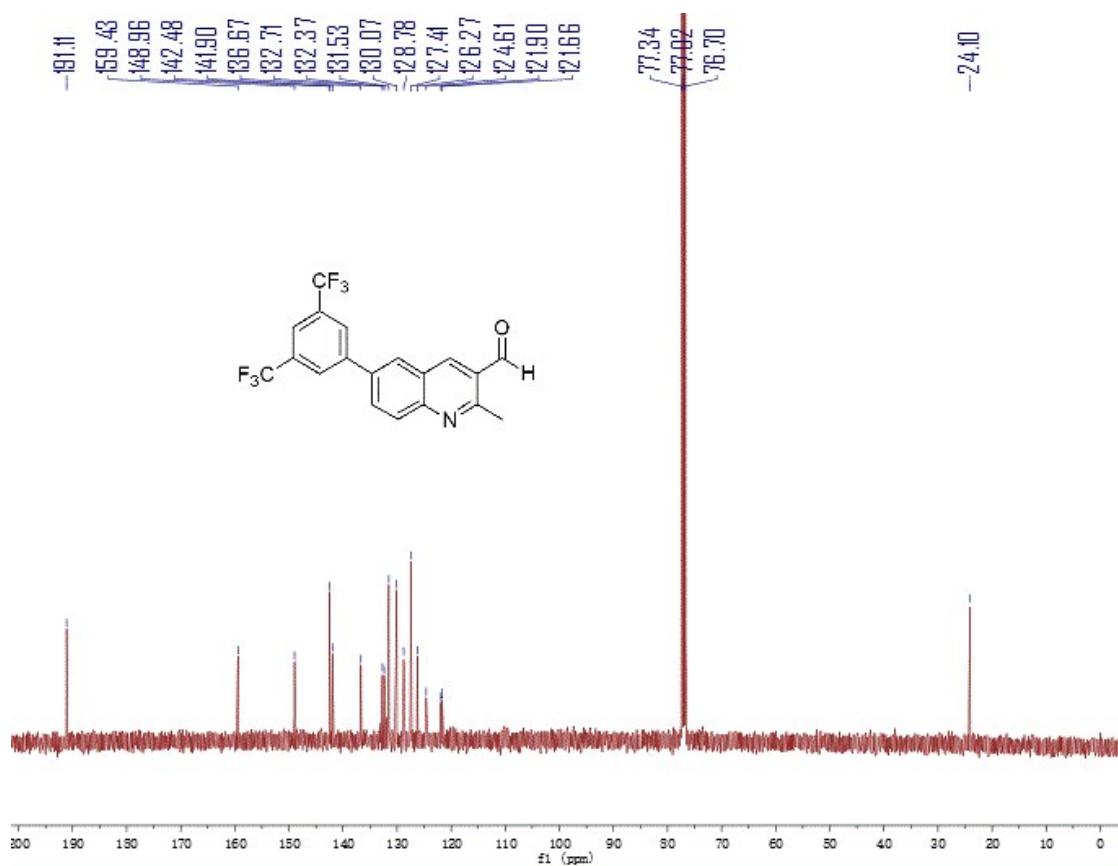



2-Methylbenzo[g]quinoline-3-carbaldehyde (1g)

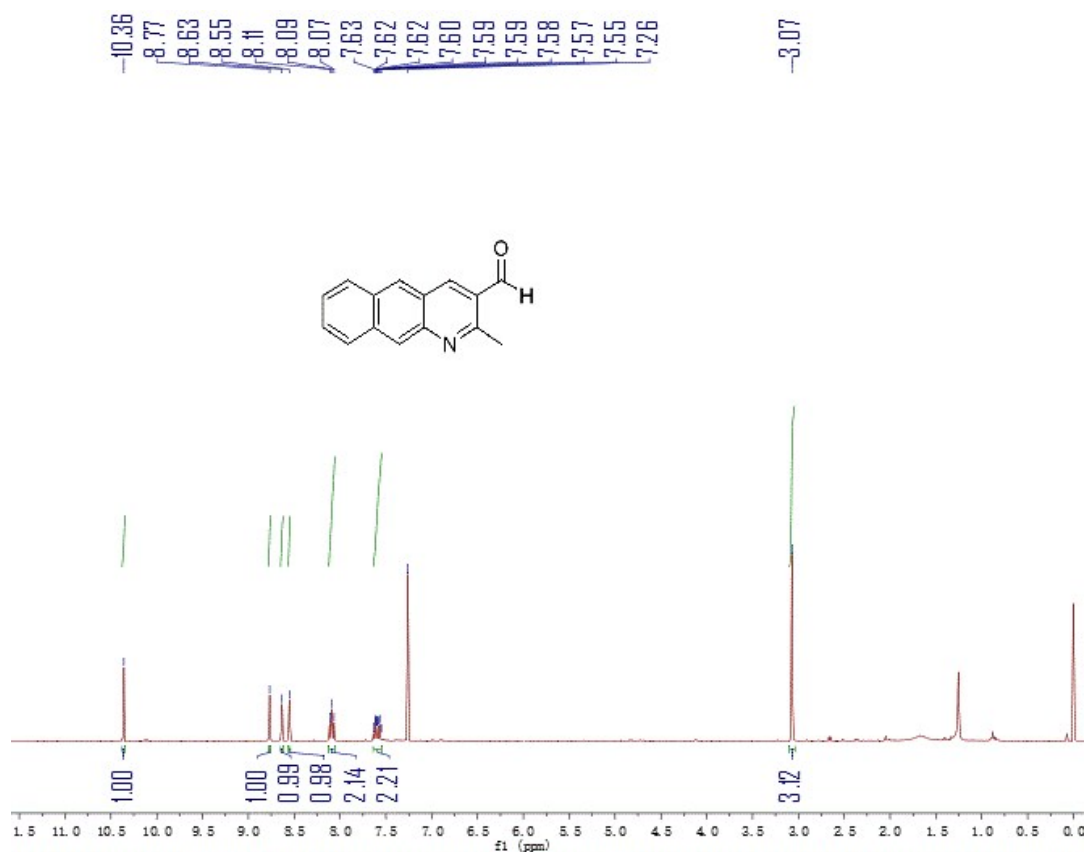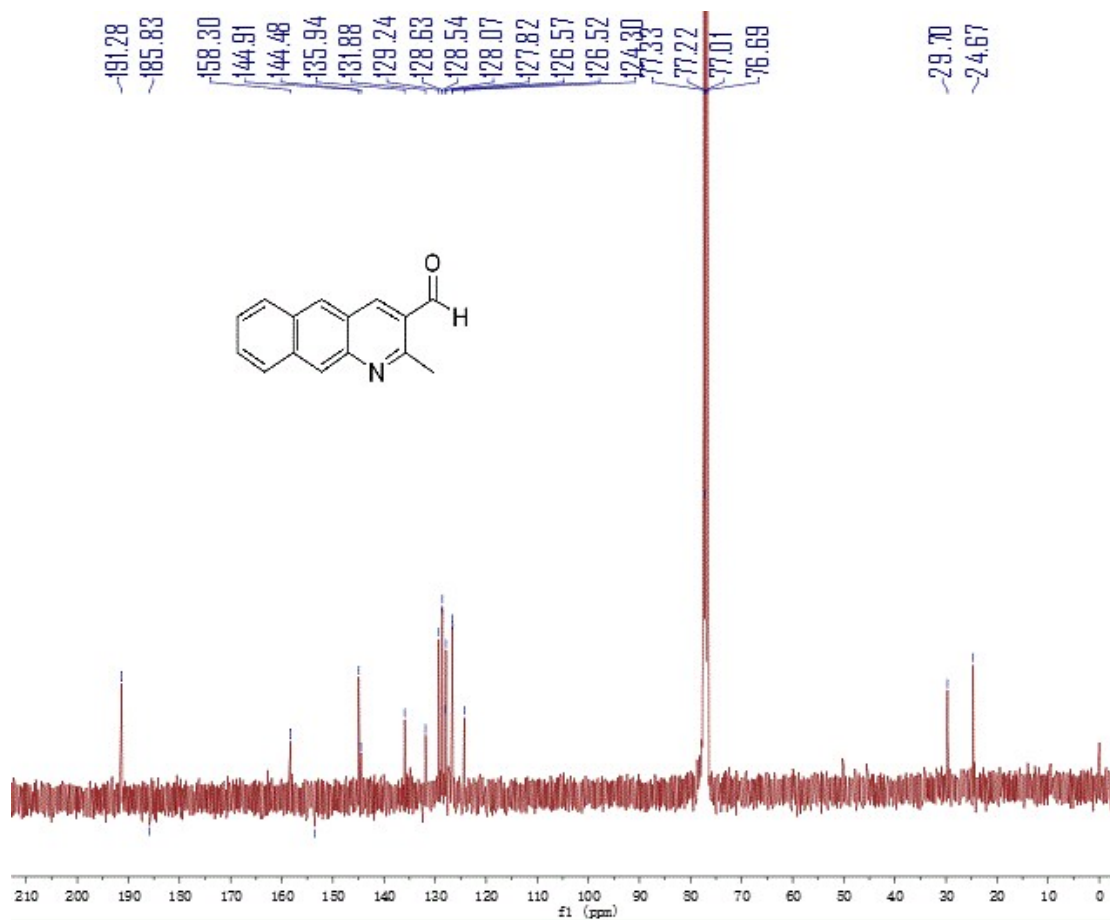



2-Methylnicotinaldehyde (1h)

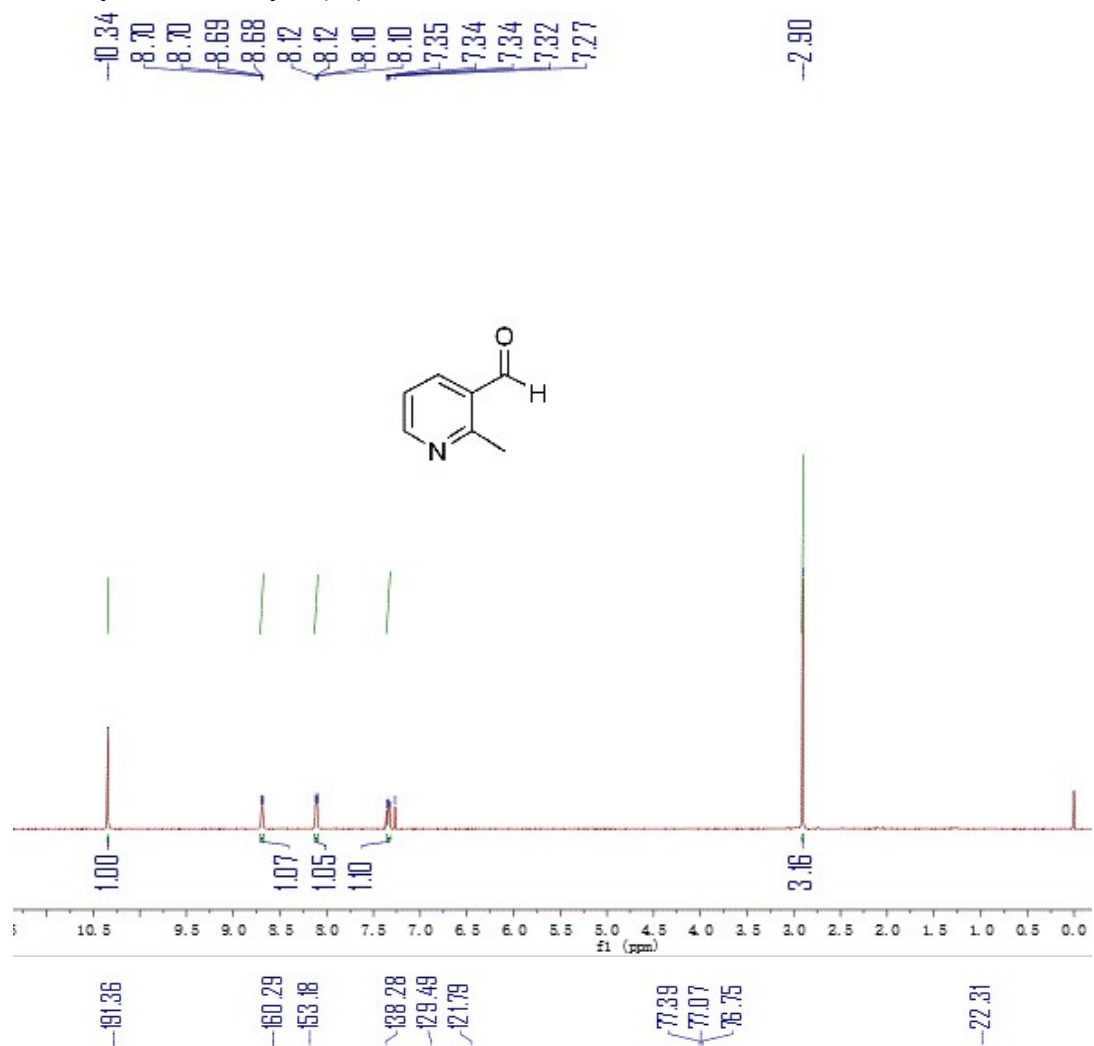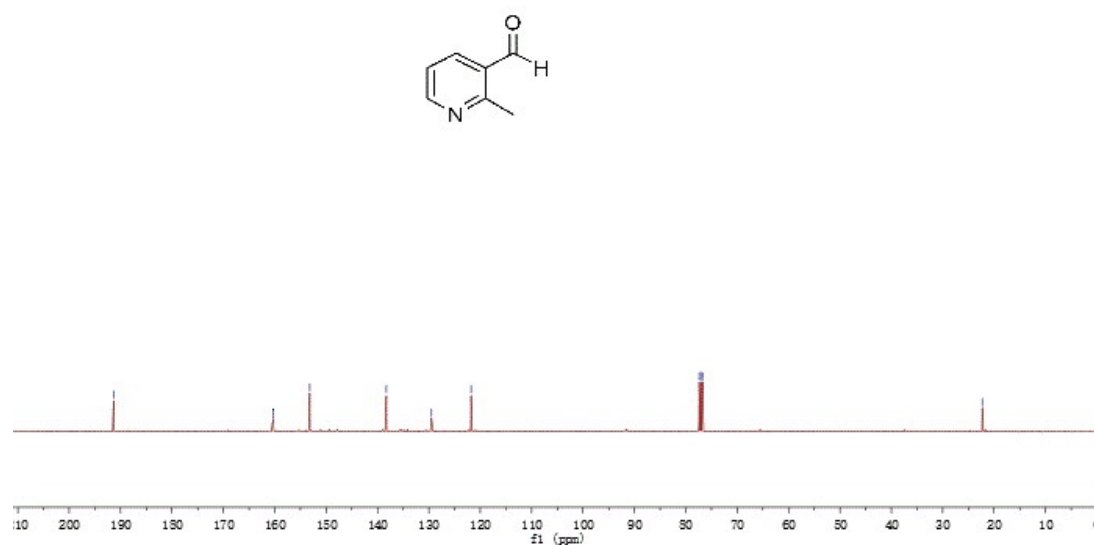

8-Bromo-2-methylquinoline-3-carbaldehyde (1i)

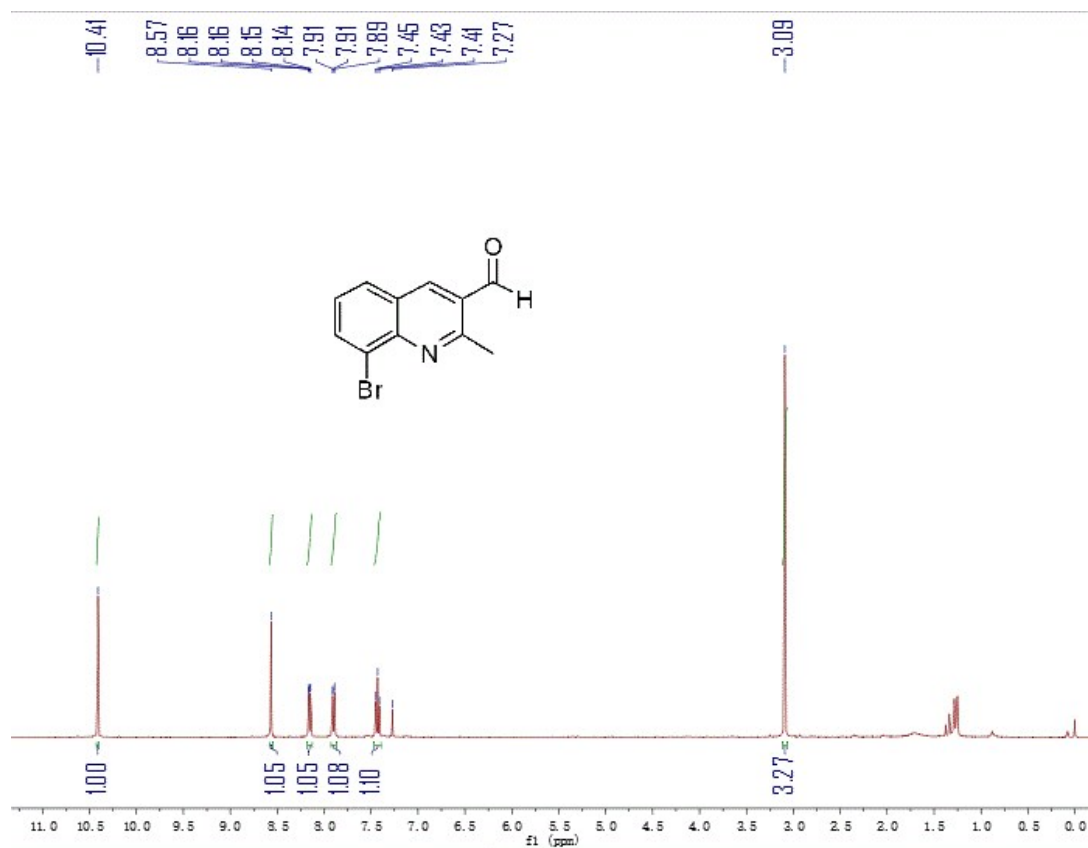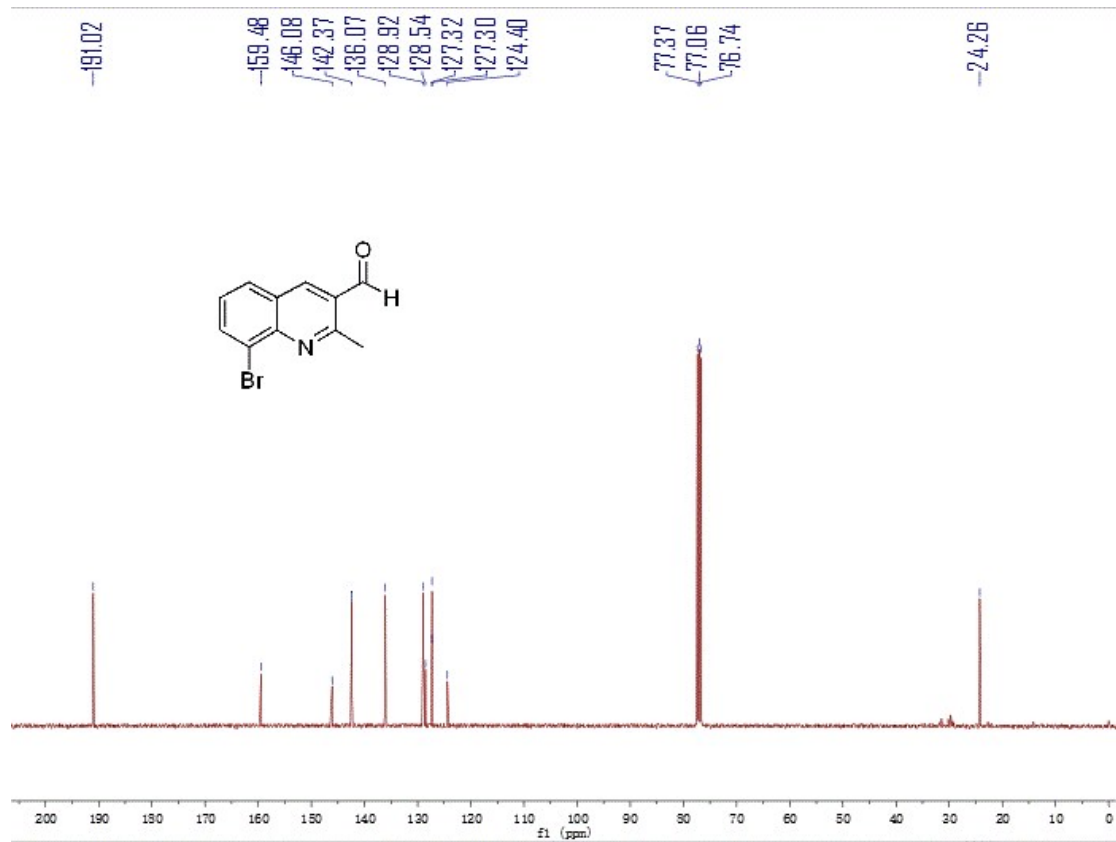

**8-Methoxy-2-methylquinoline-3-carbaldehyde (1j)**

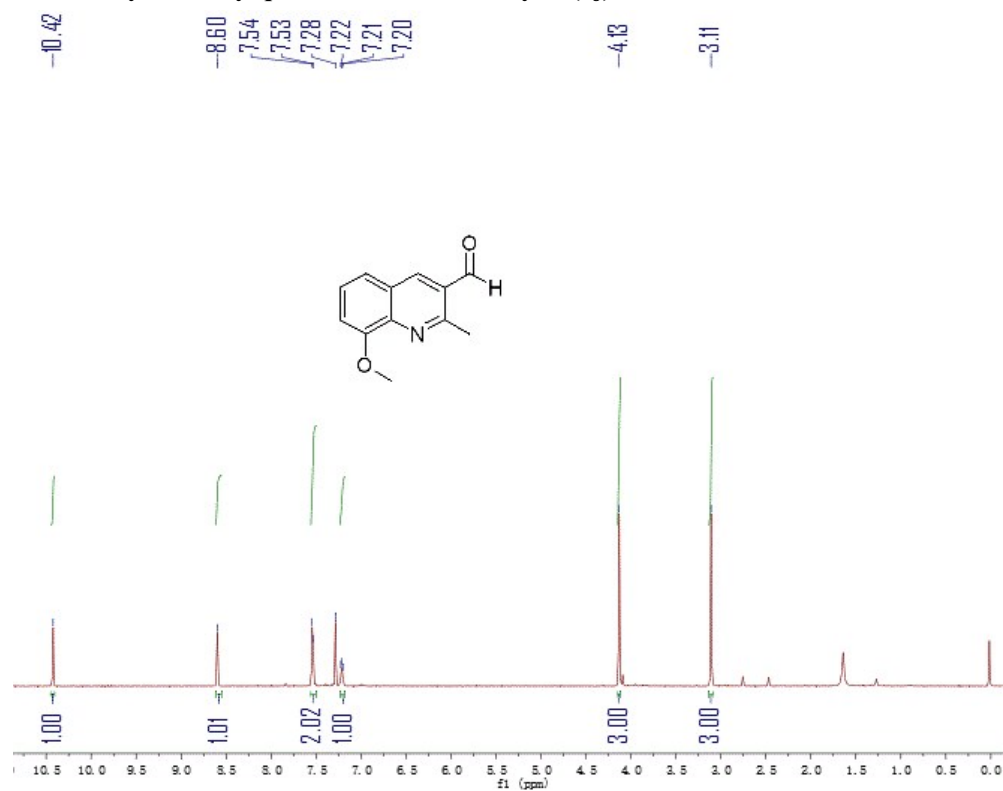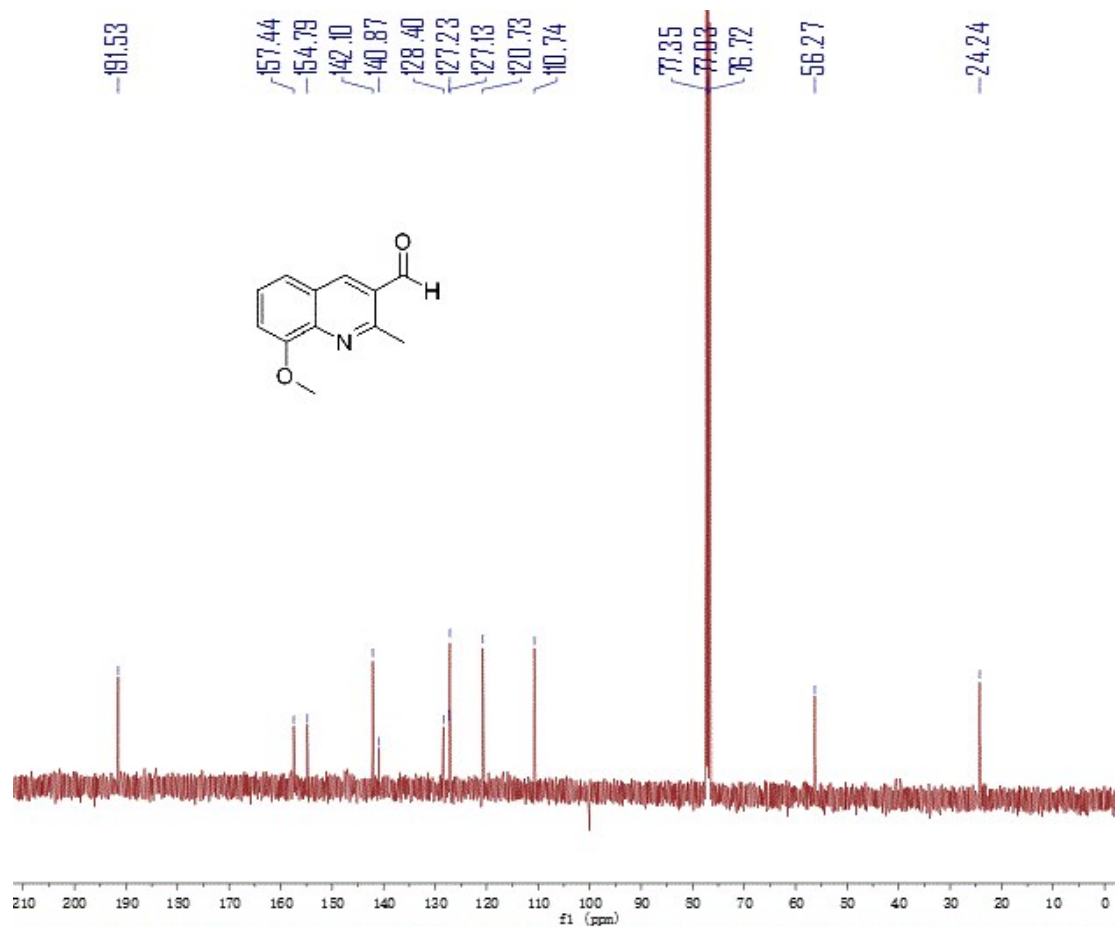

**(S)-2,3-Dimethoxy-6,8,15,15a-tetrahydro-5H-benzo[b]isoquinolino[2,1-g][1,6]naphthyridine  
(3a)**

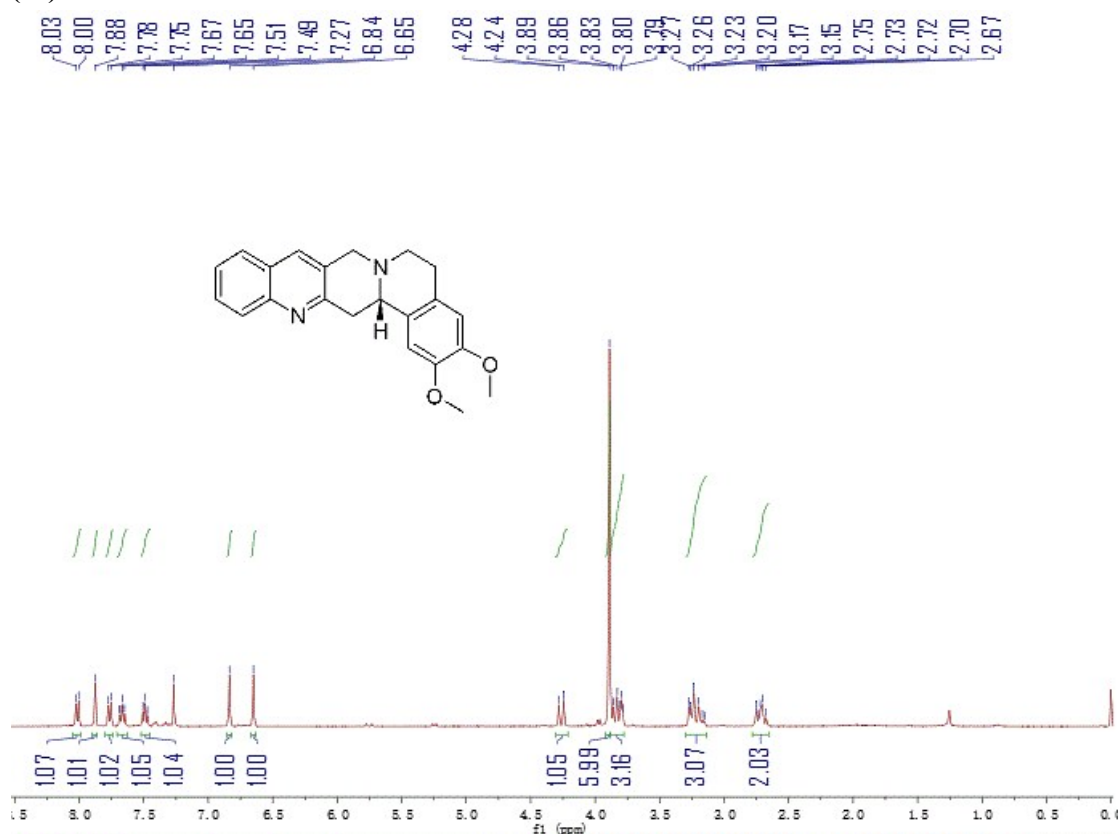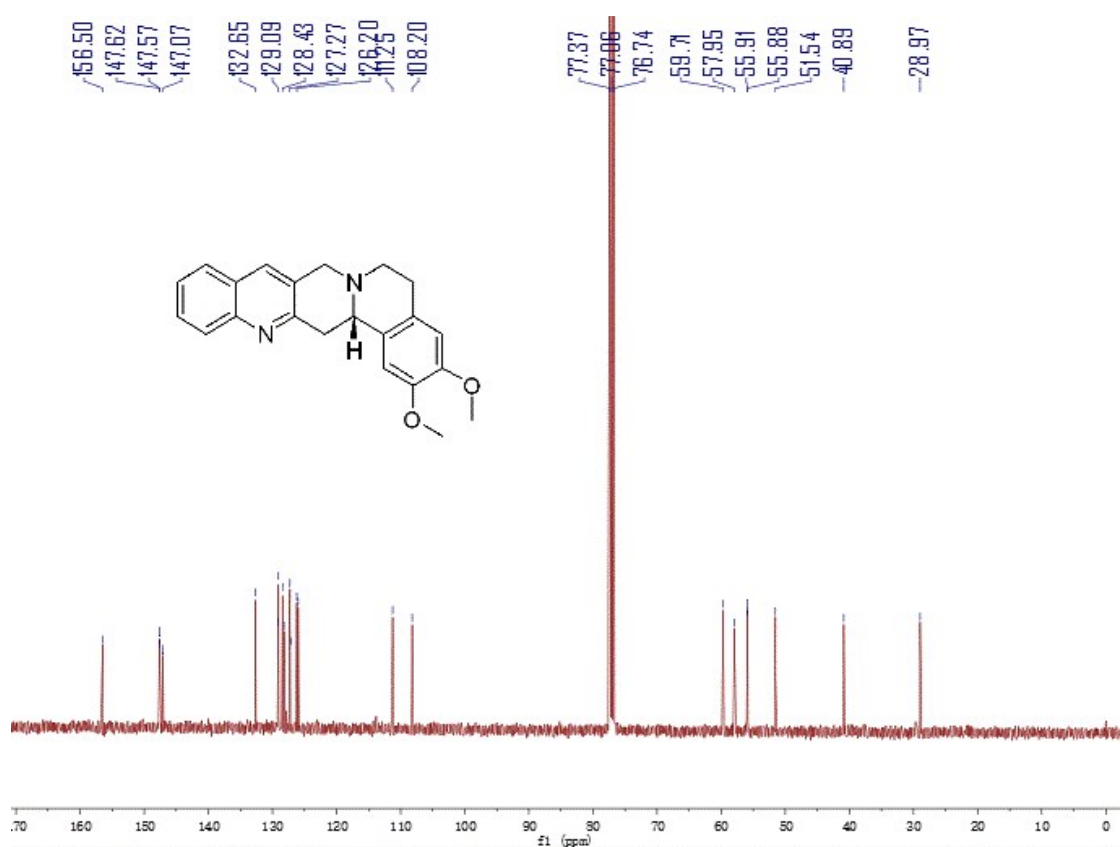

**(S)-11-Bromo-2,3-dimethoxy-6,8,15,15a-tetrahydro-5H-benzo[b]isoquinolino[2,1-g][1,6]naphthyridine (3b)**

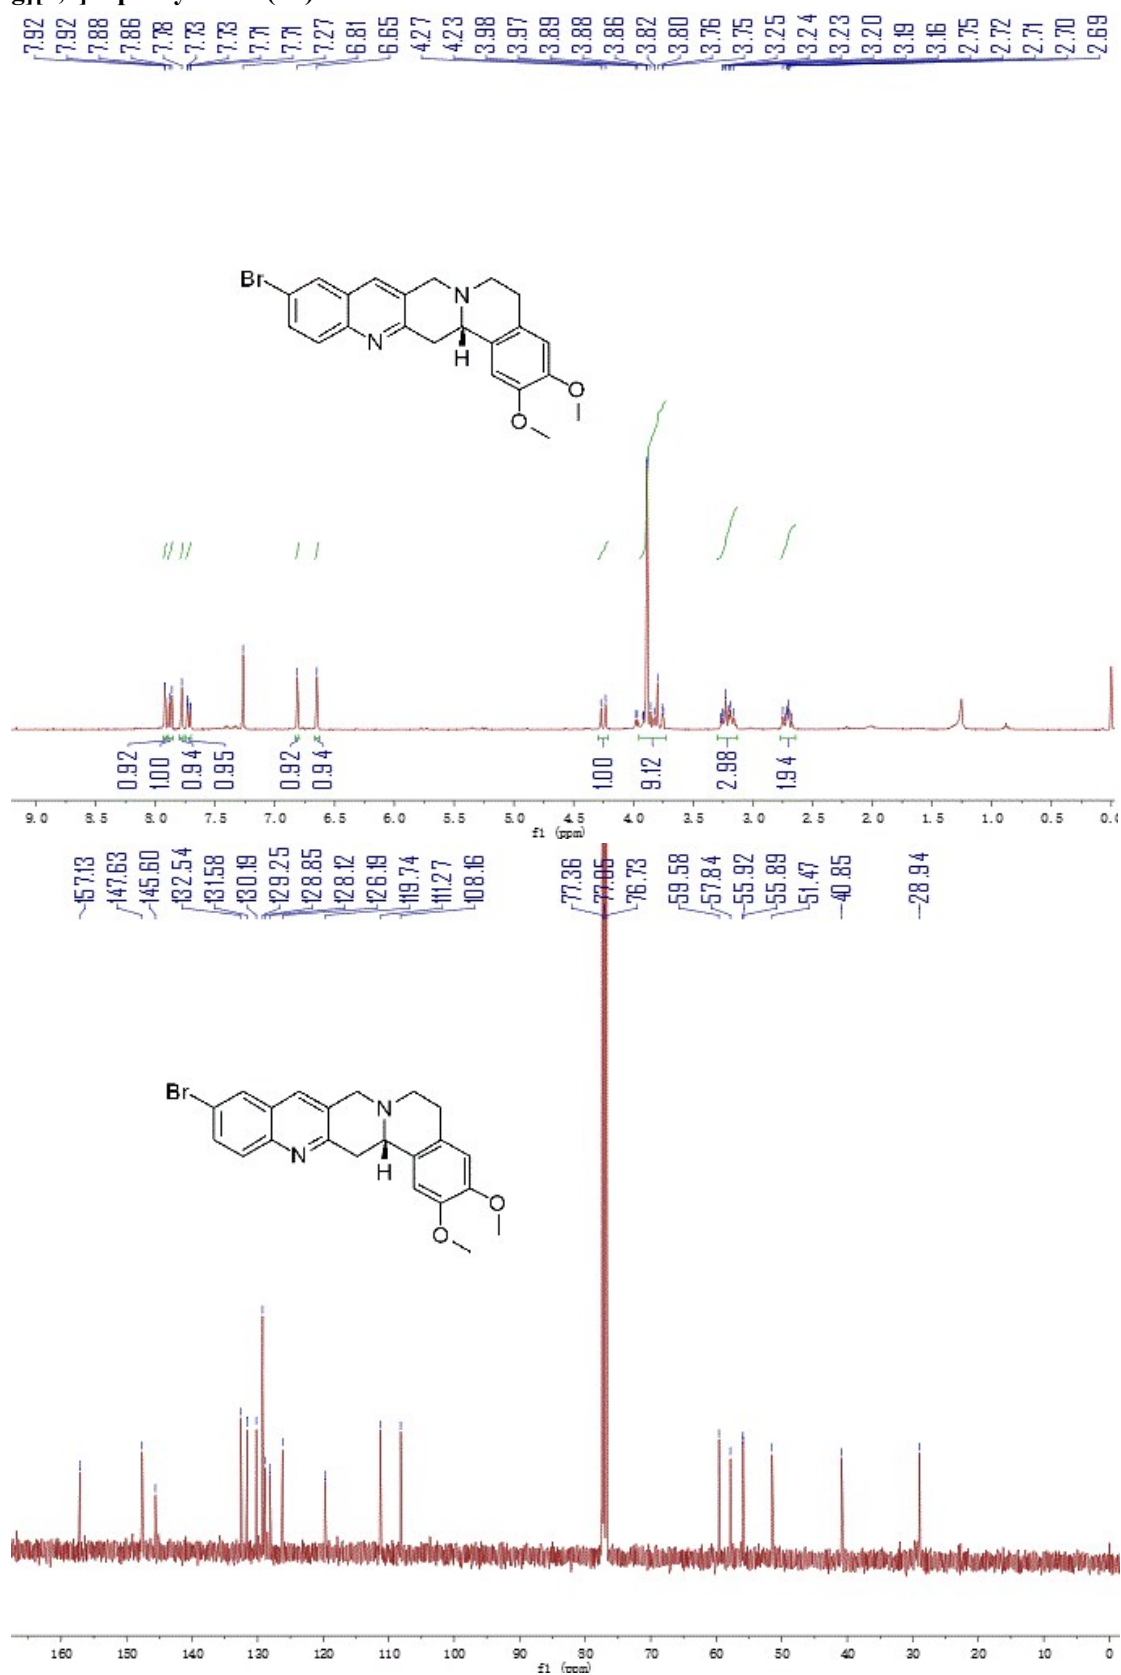

**(S)-11-Chloro-2,3-dimethoxy-6,8,15,15a-tetrahydro-5H-benzo[b]isoquinolino[2,1-g][1,6]naphthyridine (3c)**

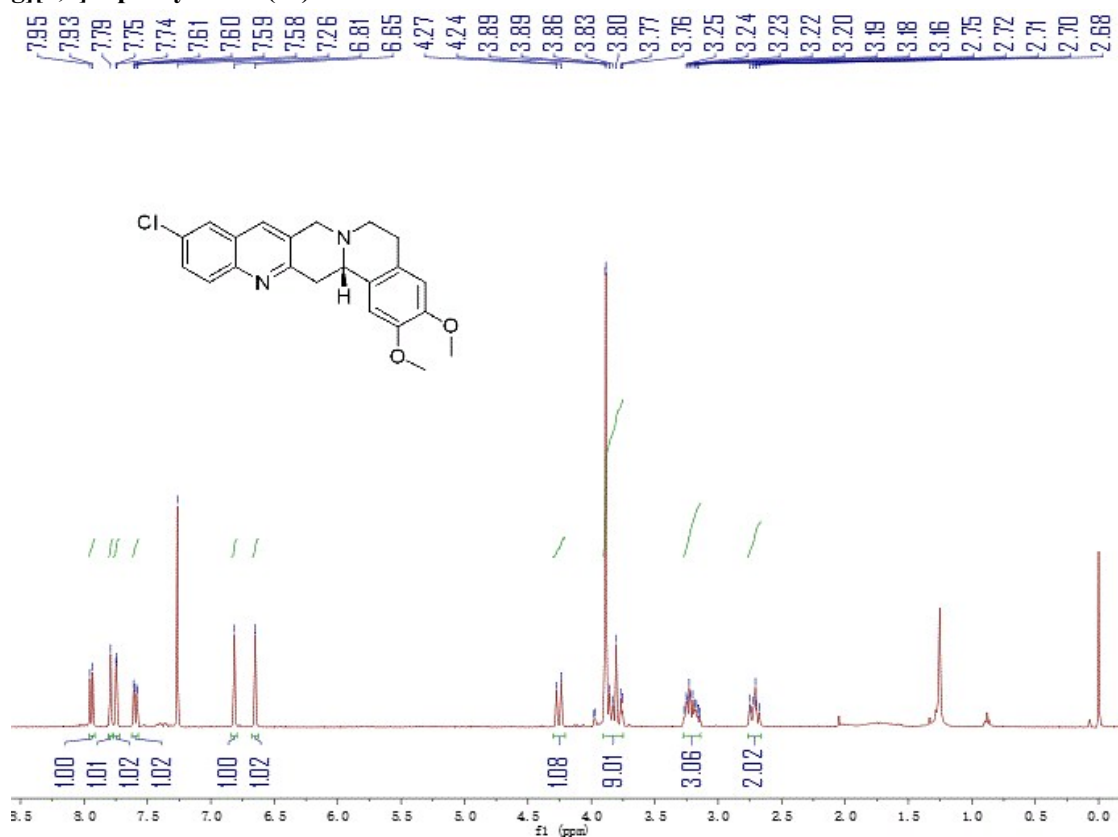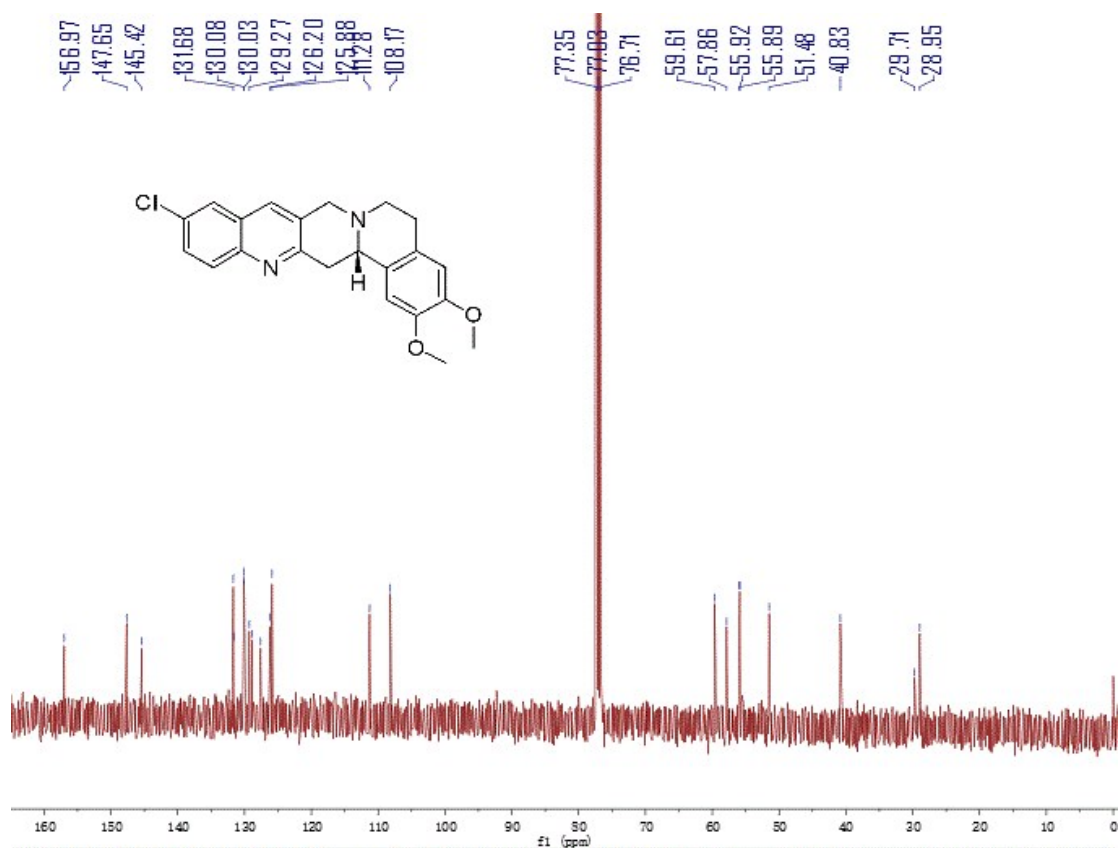

**(S)-2,3,11-Trimethoxy-6,8,15,15a-tetrahydro-5H-benzo[b]isoquinolino[2,1-g][1,6]naphthyridine (3d)**

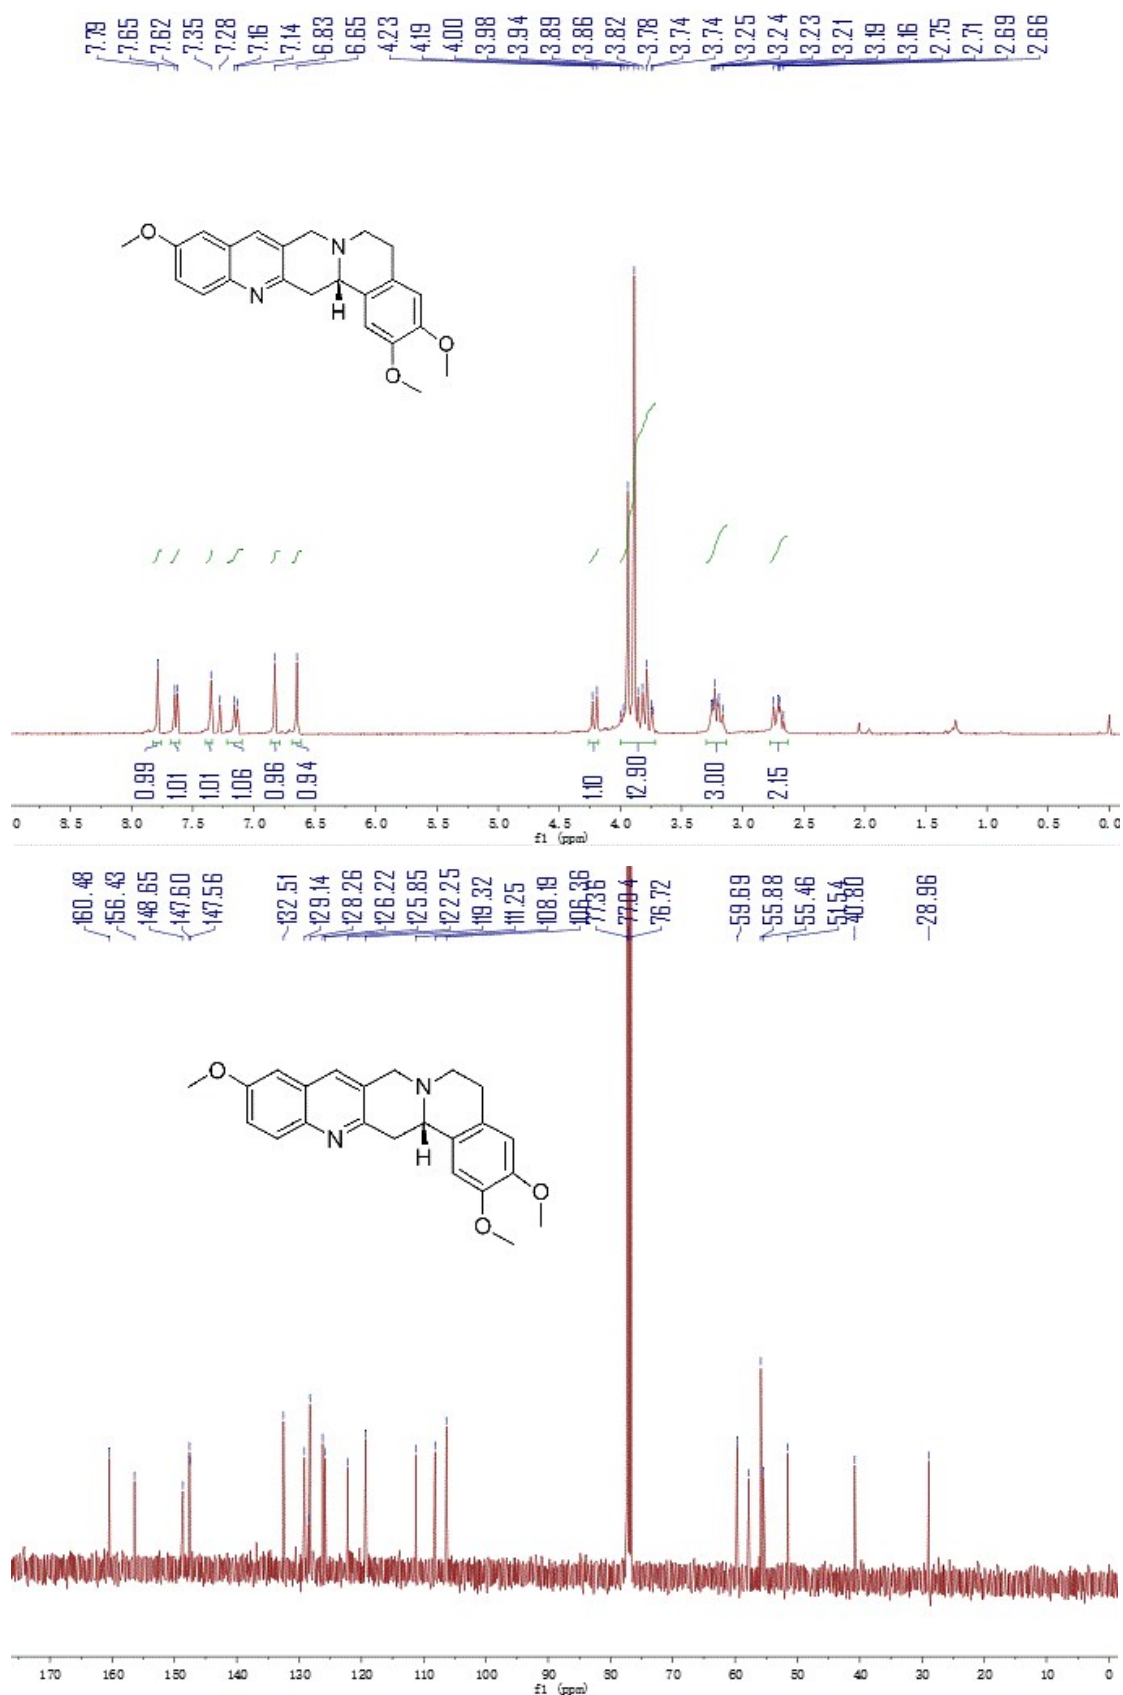



**(S)-2,3-Dimethoxy-11-phenyl-6,8,15,15a-tetrahydro-5H-benzo[b]isoquinolino[2,1-g][1,6]naphthyridine (3e)**

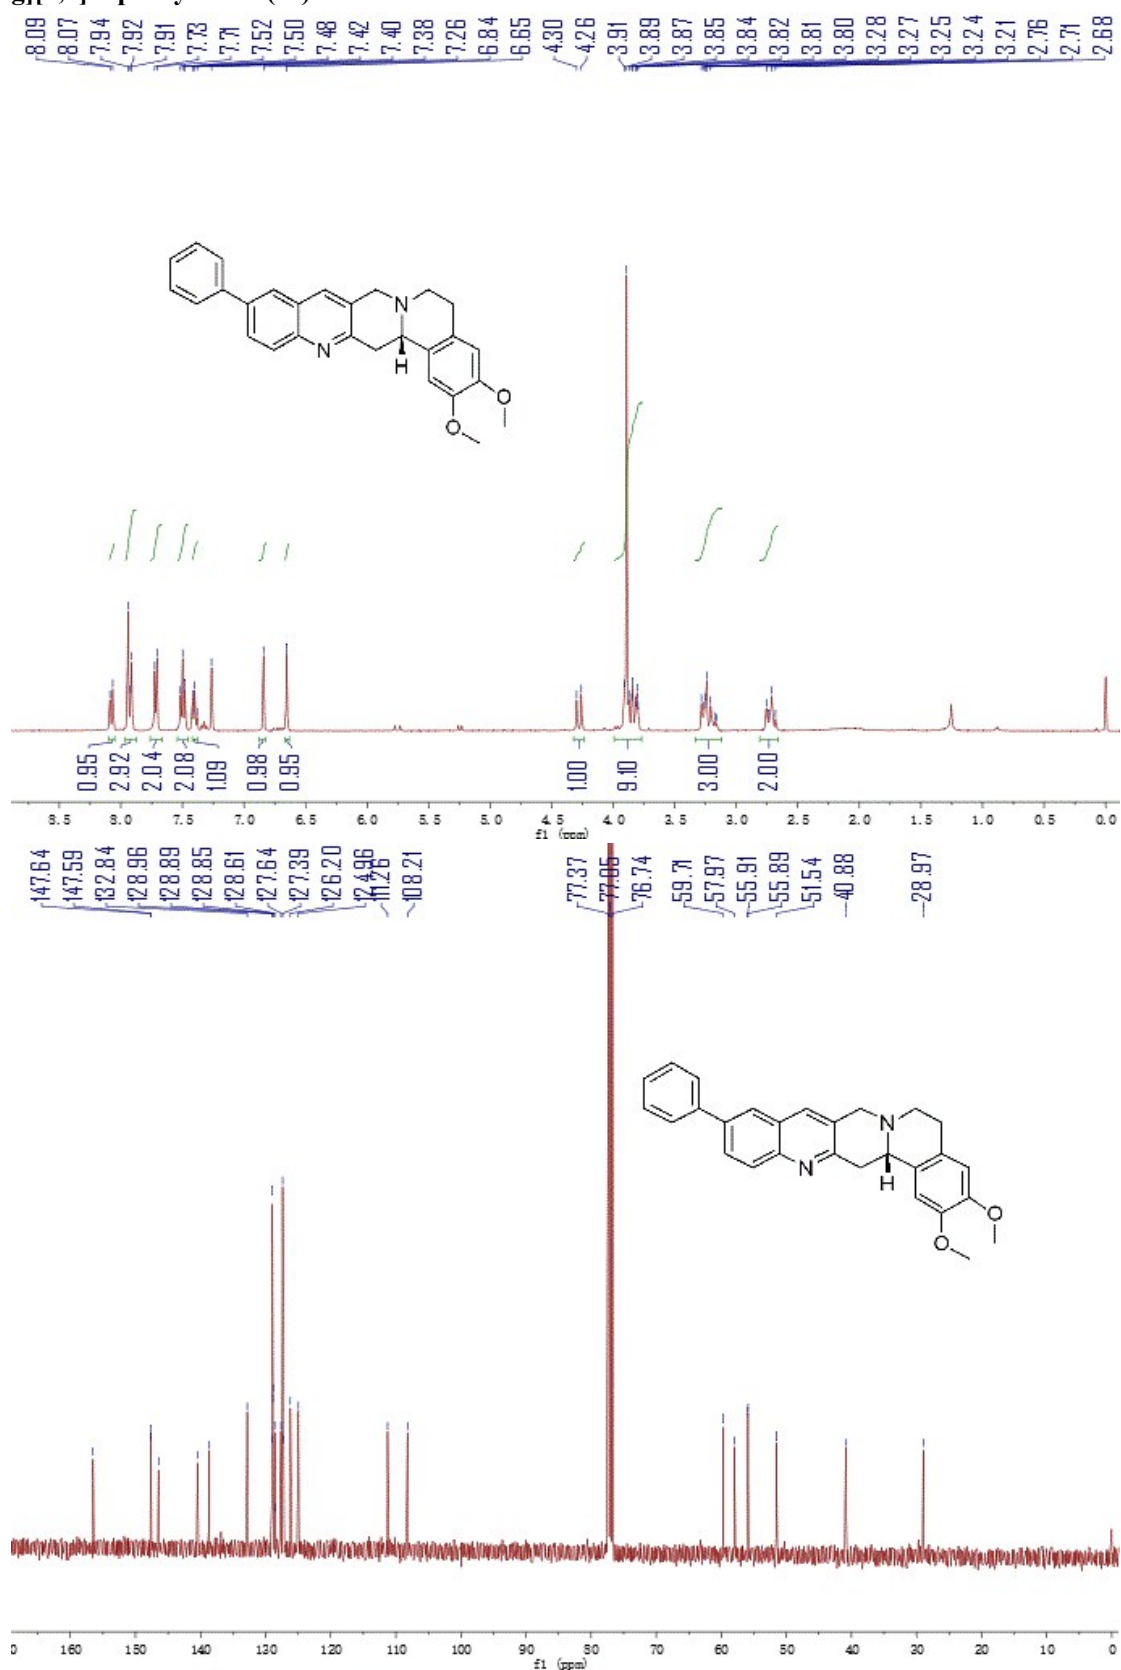



**(S)-11-(3,5-bis(Trifluoromethyl)phenyl)-2,3-dimethoxy-6,8,15,15a-tetrahydro-5H-benzo[b]isoquinolino[2,1-g][1,6]naphthyridine (3f)**

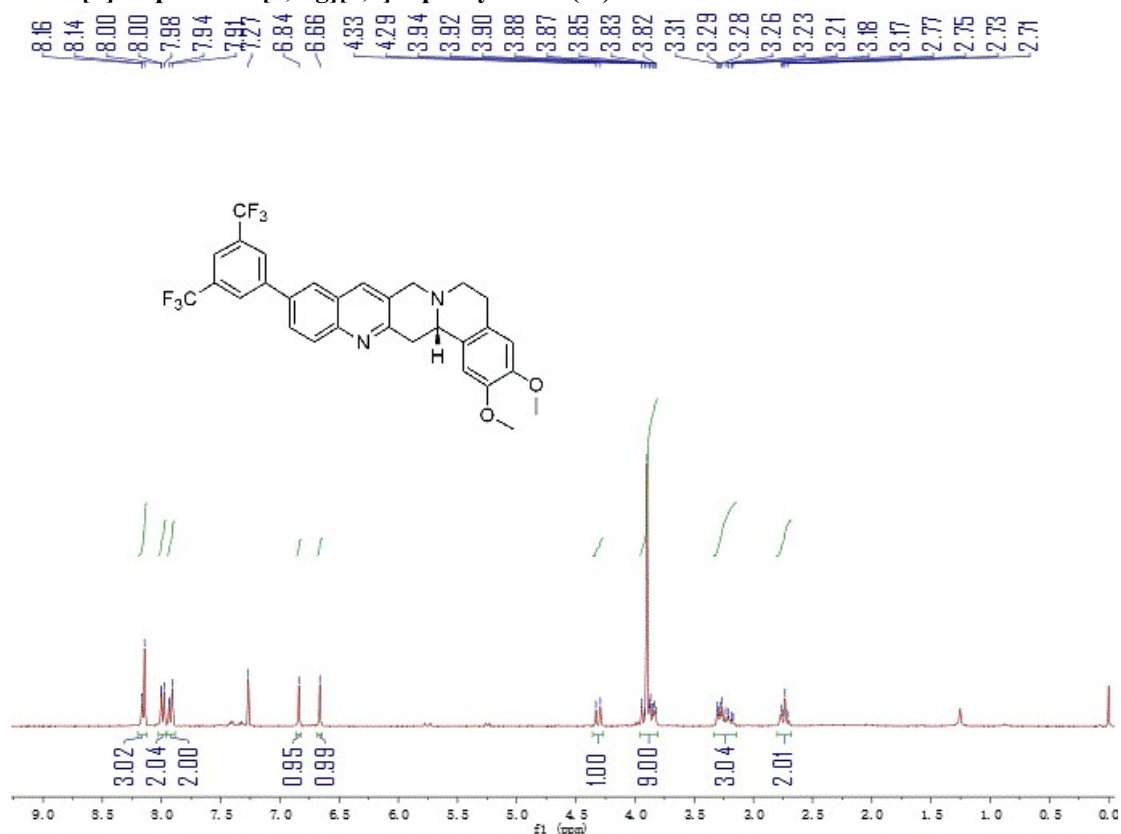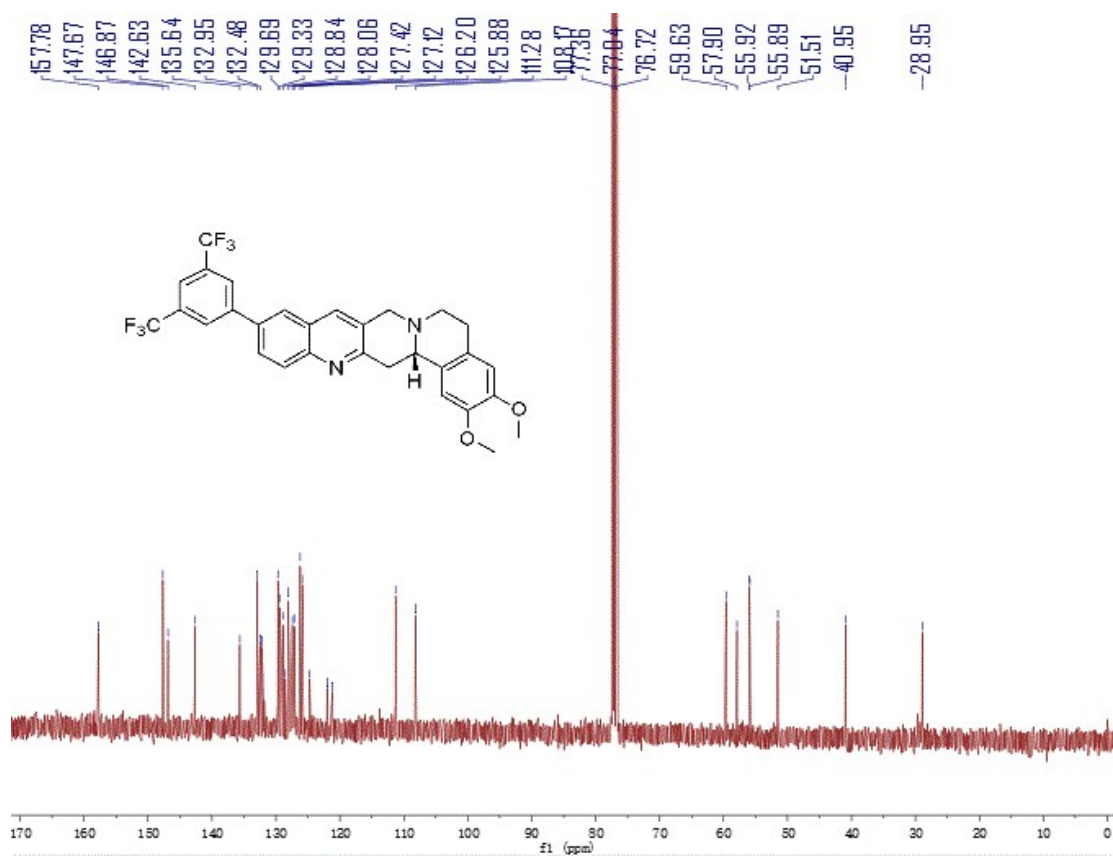

**(S)-2,3-Dimethoxy-6,8,17,17a-tetrahydro-5H-isoquinolino[2,1-g]naphtho[2,3-b][1,6]naphthyridine**

**(3g)**

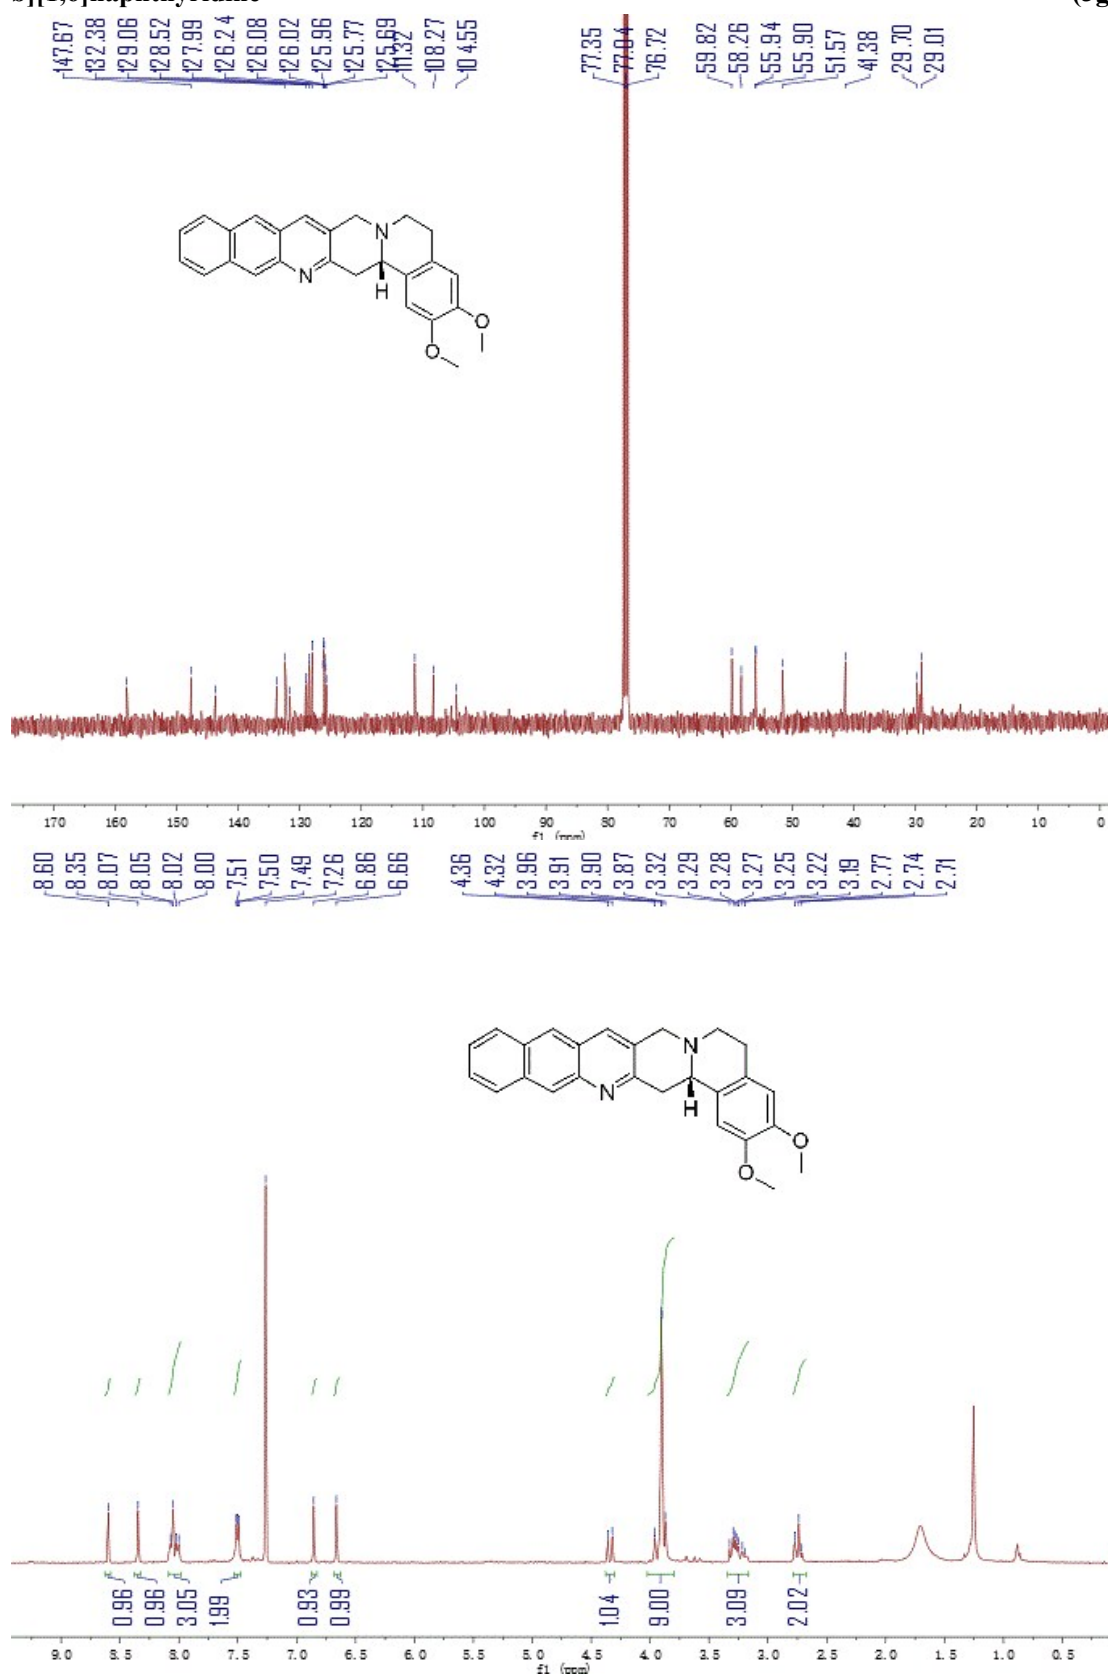

**(S)-6,8,15,15a-Tetrahydro-5H-benzo[b]isoquinolino[2,1-g][1,6]naphthyridine (3i)**

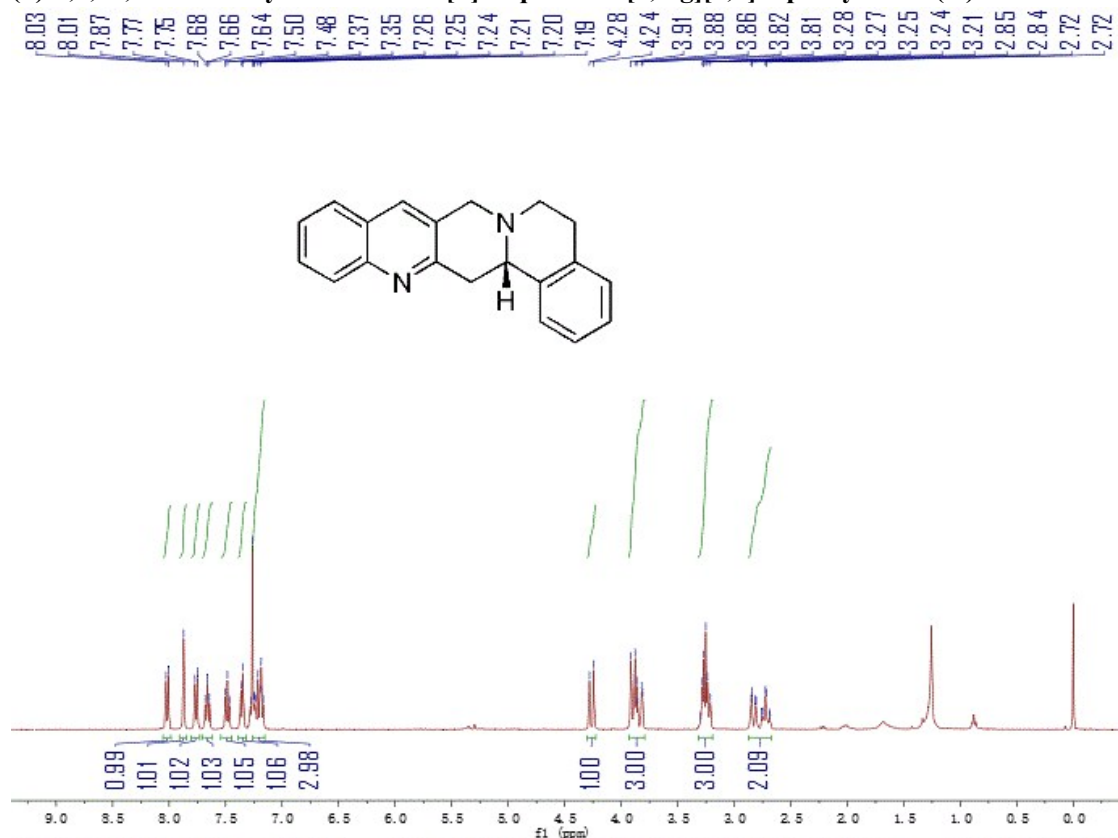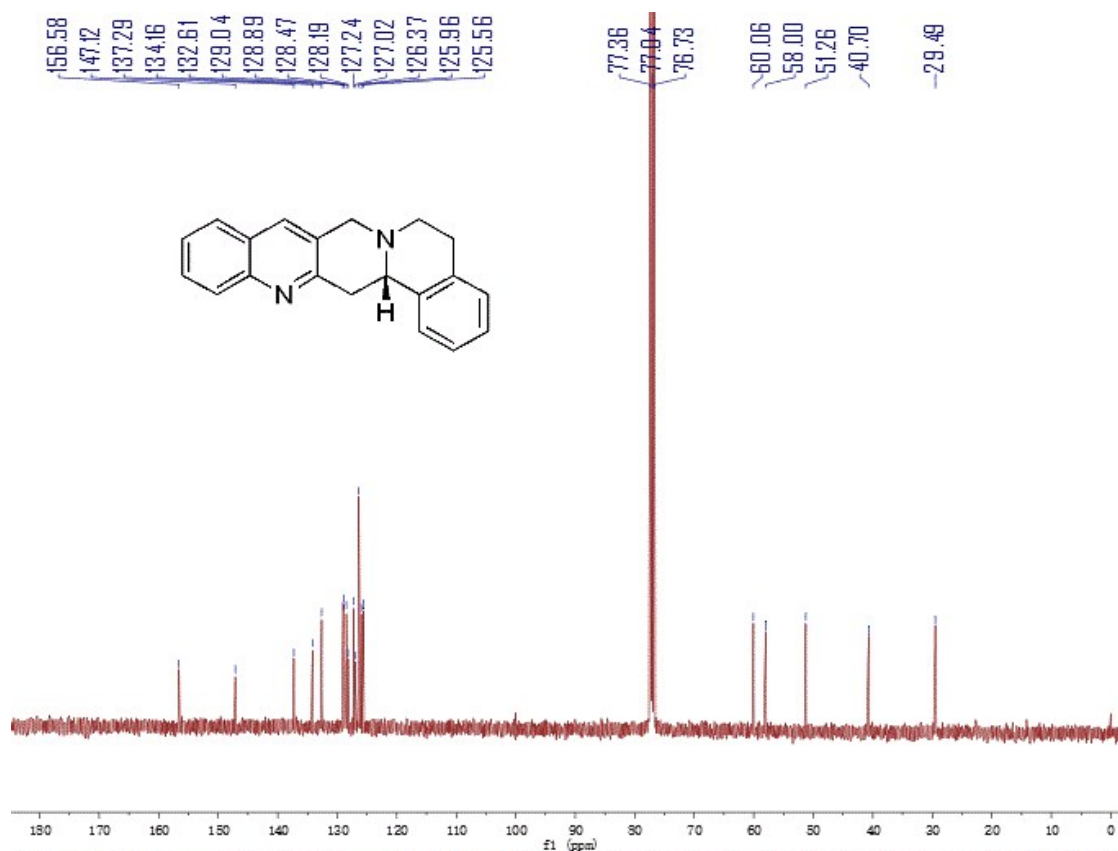

**(S)-3-Methoxy-6,8,15,15a-tetrahydro-5H-benzo[b]isoquinolino[2,1-g][1,6]naphthyridine (3j)**

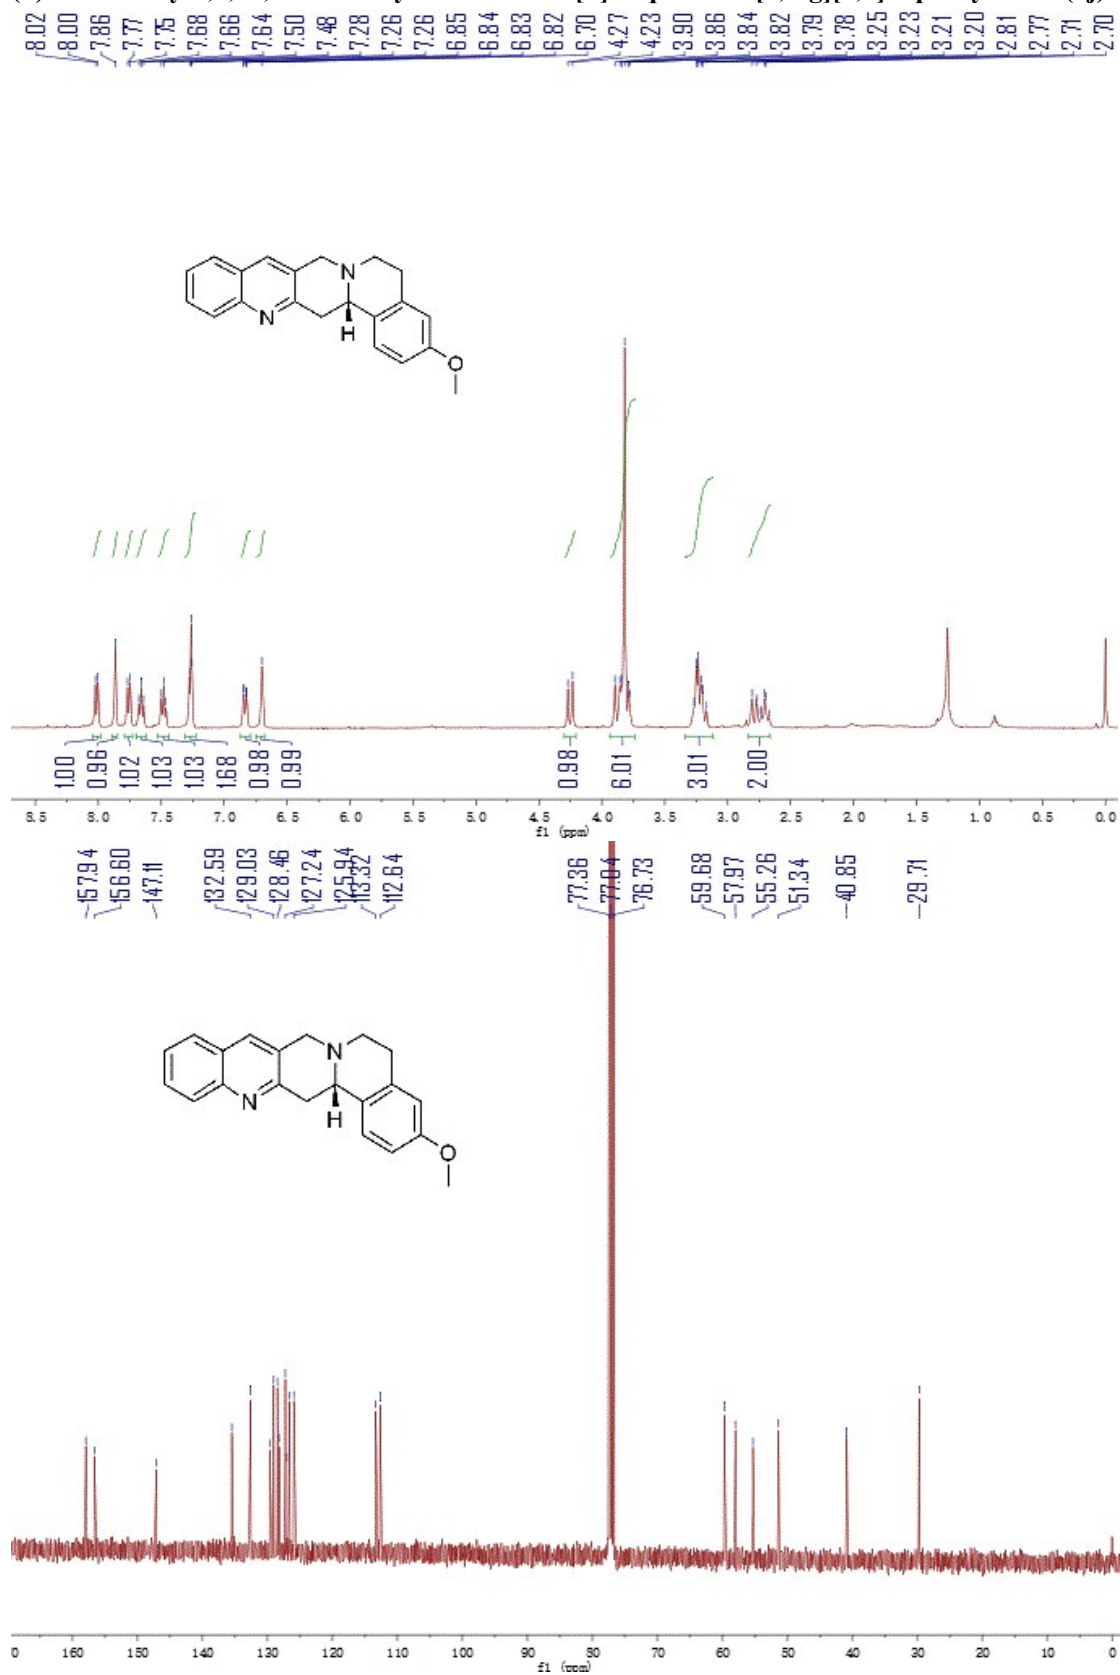

**(S)-6,8,15,15a-Tetrahydro-5H-[1,3]dioxolo[4',5':6,7]isoquinolino[2,1-g]benzo[b][1,6]naphthyridine(3k)**

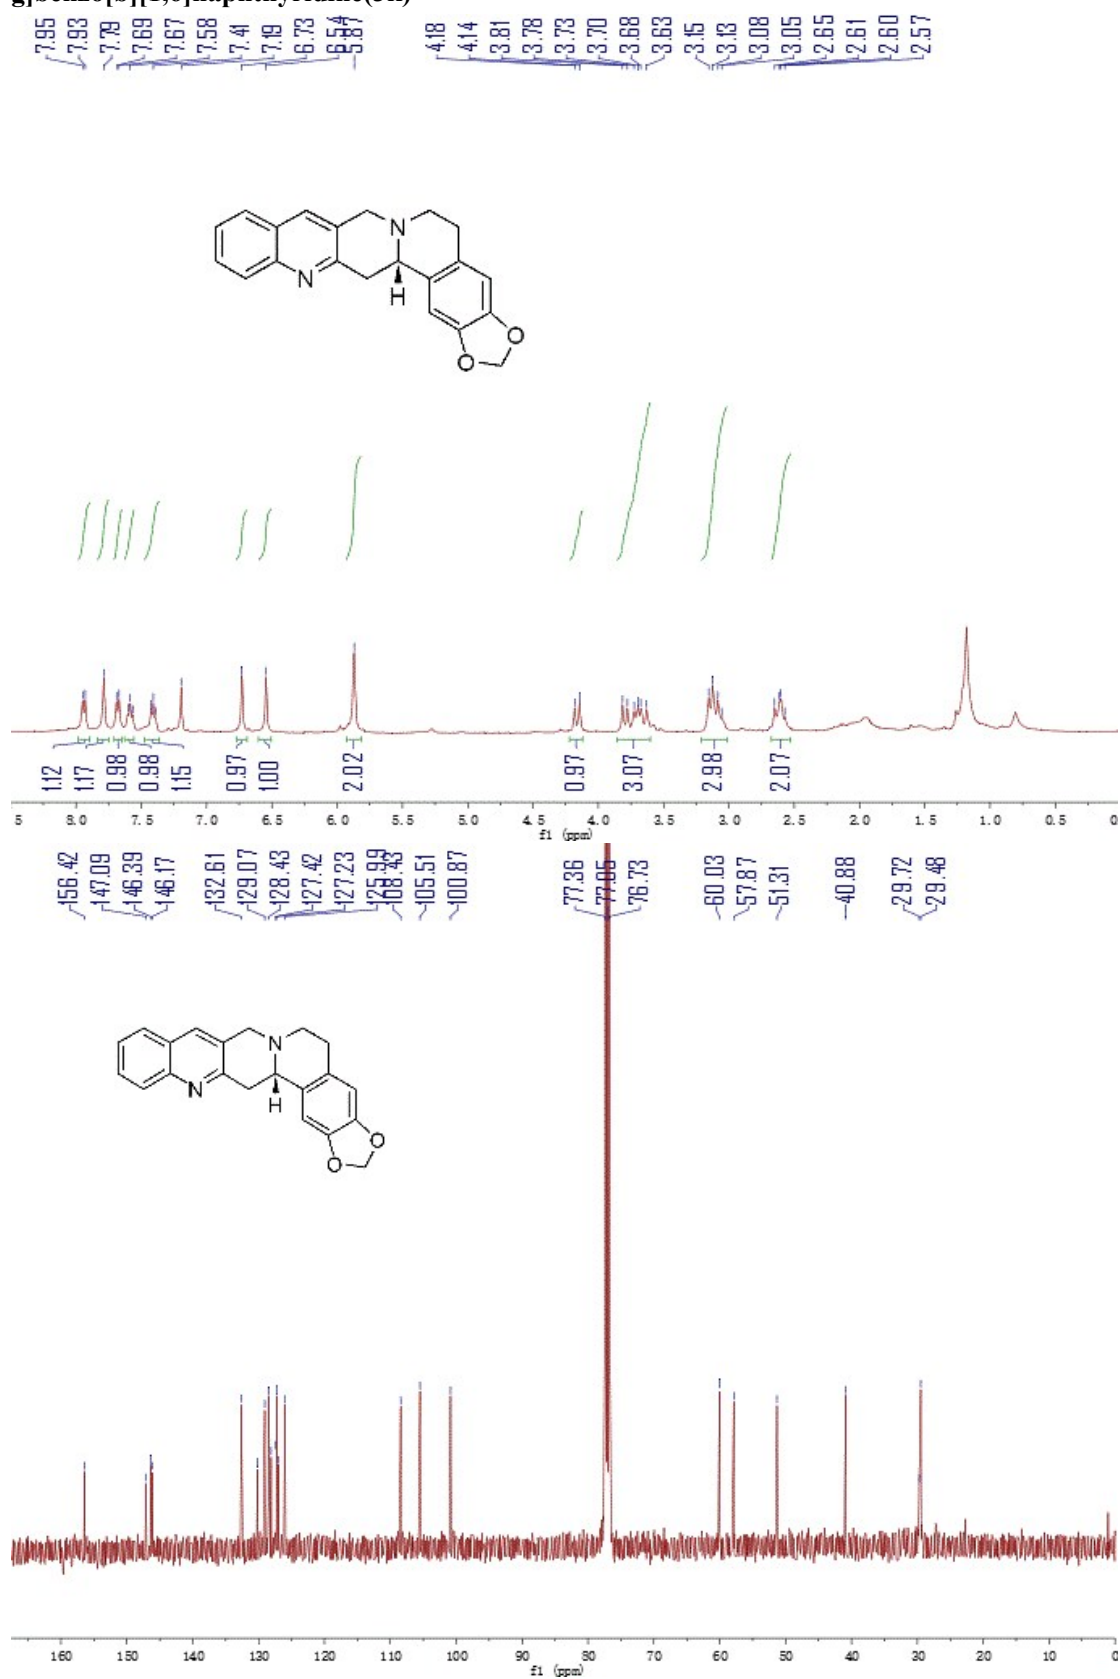

**(S)-3-Bromo-6,8,15,15a-tetrahydro-5H-benzo[b]isoquinolino[2,1-g][1,6]naphthyridine (3l)**

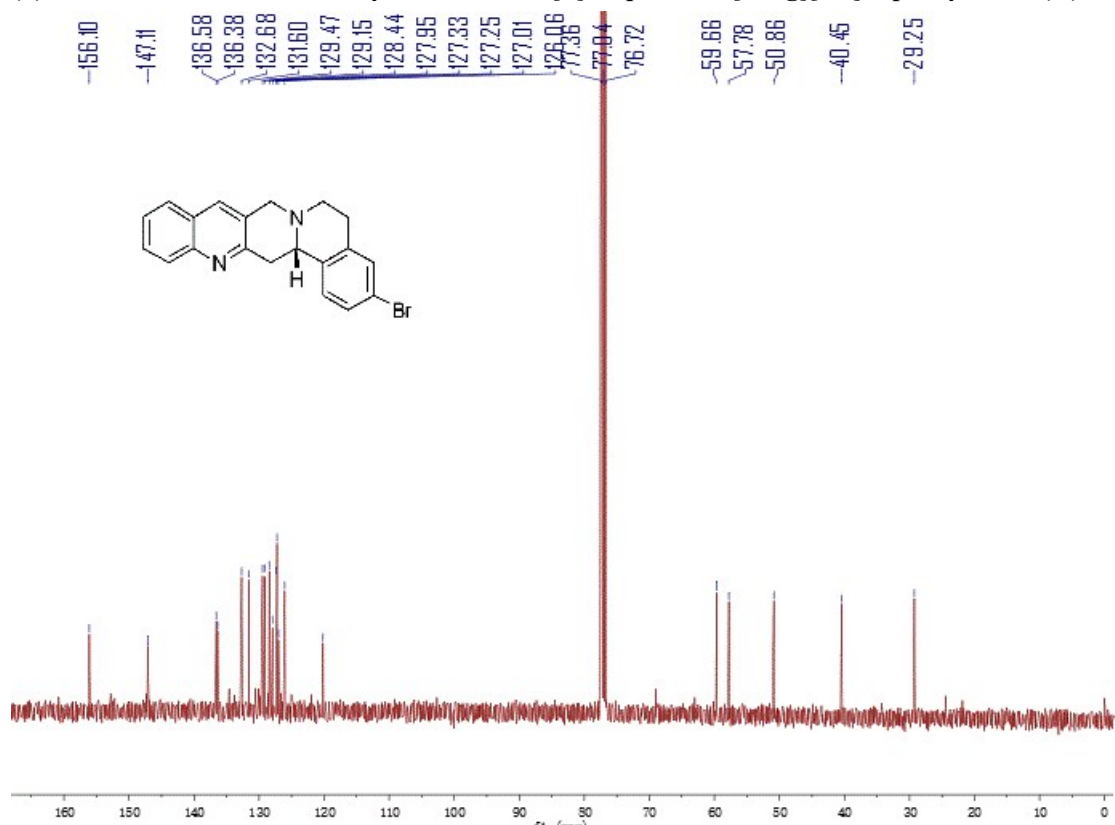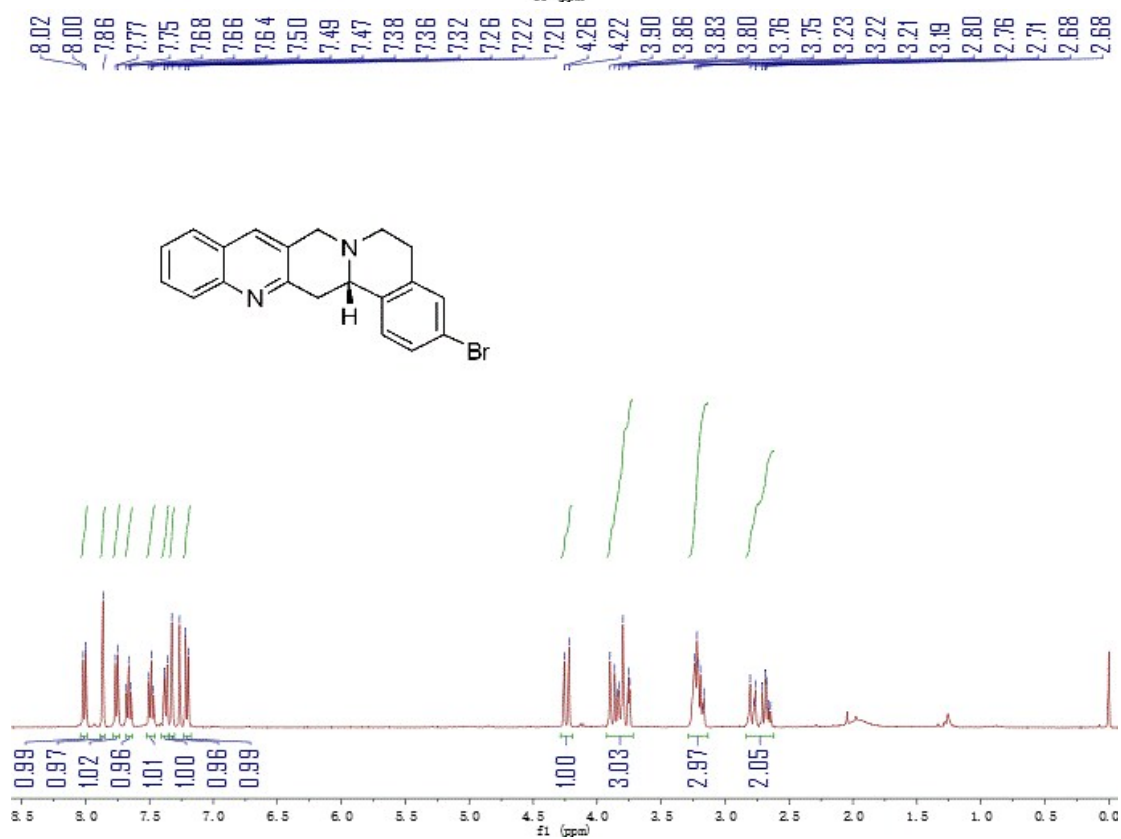



**(S)-5,6,8,15,15a,16-Hexahydrobenzo[b]indolo[2',3':3,4]pyrido[1,2-g][1,6]naphthyridine (3m)**

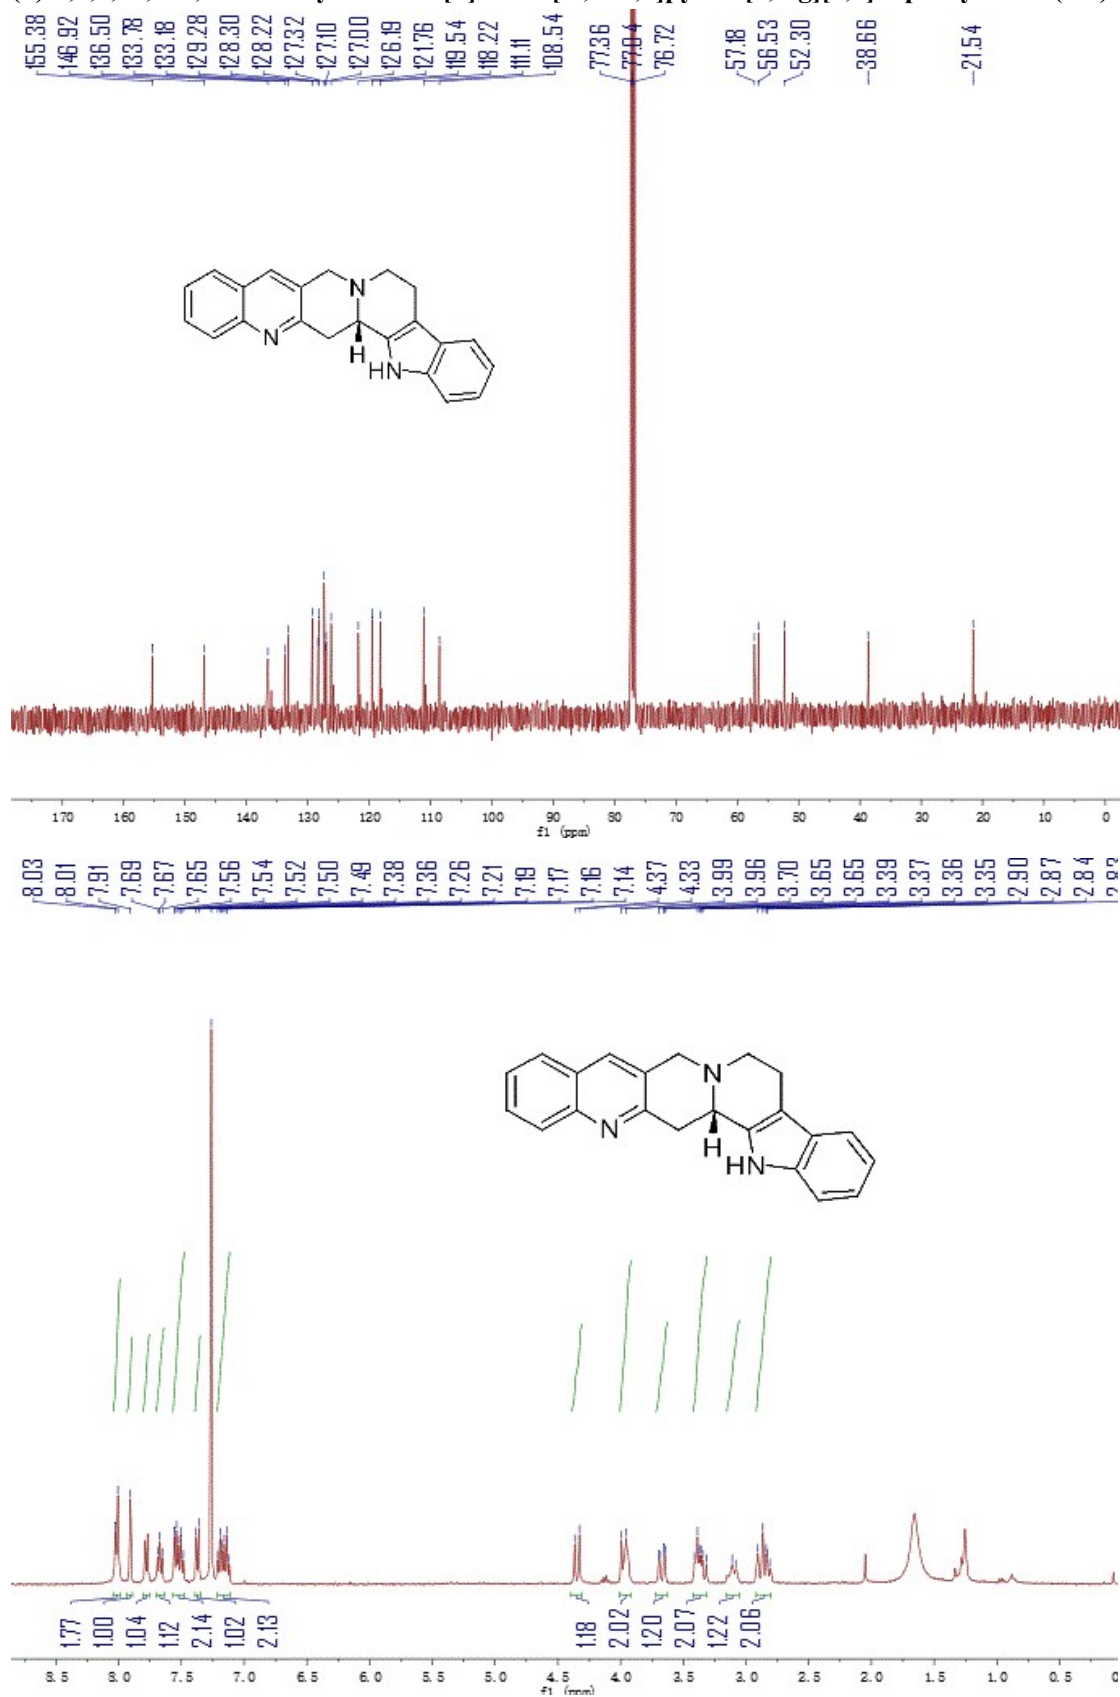

**8. Chiral HPLC analysis spectra**

### <Chromatogram>

mAU

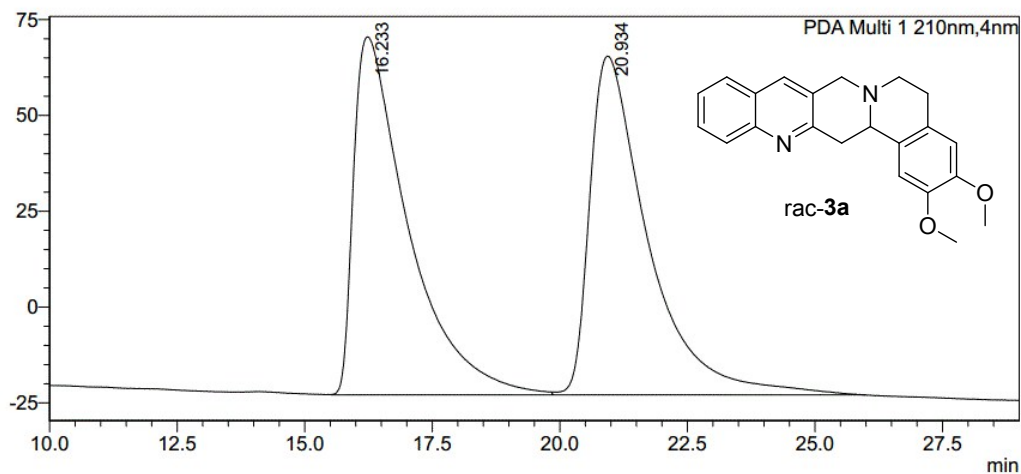

### <Peak Table>

PDA Ch1 210nm

| Peak# | Ret. Time | Area     | Height | Conc.  | Unit | Mark | Name      |
|-------|-----------|----------|--------|--------|------|------|-----------|
| 1     | 16.233    | 6947623  | 93405  | 49.719 | %    | SV   | RT:16.233 |
| 2     | 20.934    | 7026182  | 88335  | 50.281 | %    | SV   | RT:20.934 |
| Total |           | 13973805 | 181741 |        |      |      |           |

### <Chromatogram>

mAU

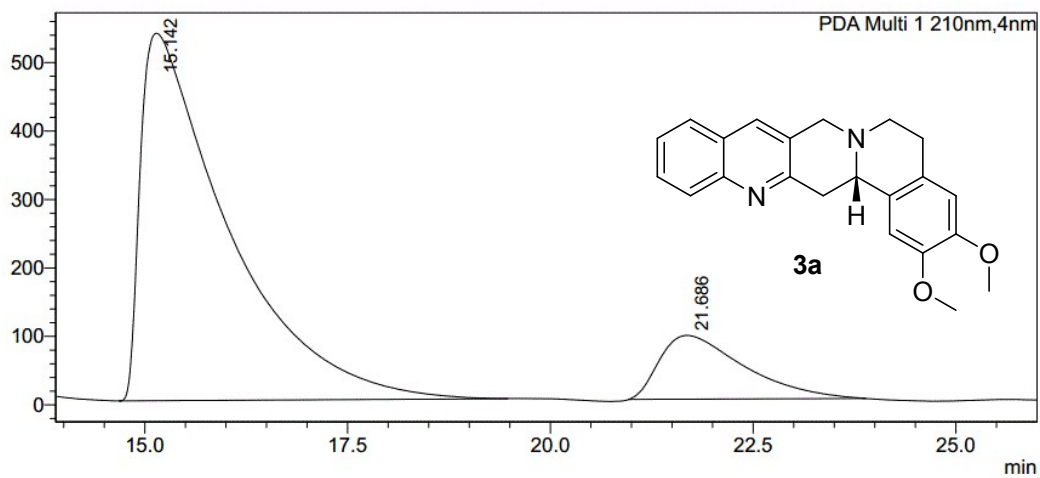

### <Peak Table>

PDA Ch1 210nm

| Peak# | Ret. Time | Area     | Height | Conc.  | Unit | Mark | Name      |
|-------|-----------|----------|--------|--------|------|------|-----------|
| 1     | 15.142    | 40224330 | 536771 | 85.668 | %    |      | RT:15.142 |
| 2     | 21.686    | 6729656  | 93048  | 14.332 | %    |      | RT:21.686 |
| Total |           | 46953986 | 629819 |        |      |      |           |



### <Chromatogram>

mAU

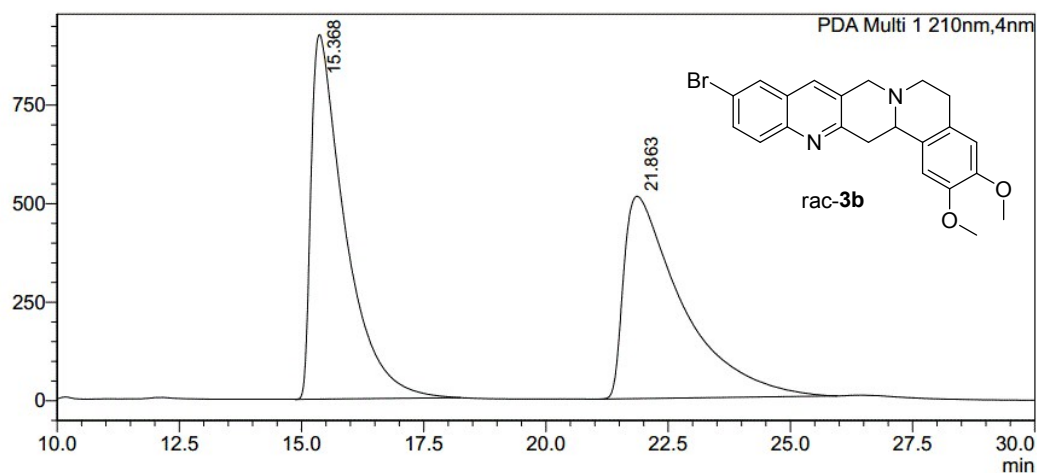

### <Peak Table>

PDA Ch1 210nm

| Peak# | Ret. Time | Area     | Height  | Conc.  | Unit | Mark | Name      |
|-------|-----------|----------|---------|--------|------|------|-----------|
| 1     | 15.368    | 44517336 | 925091  | 51.012 | %    |      | RT:15.368 |
| 2     | 21.863    | 42750723 | 513323  | 48.988 | %    |      | RT:21.863 |
| Total |           | 87268059 | 1438413 |        |      |      |           |

### <Chromatogram>

mAU

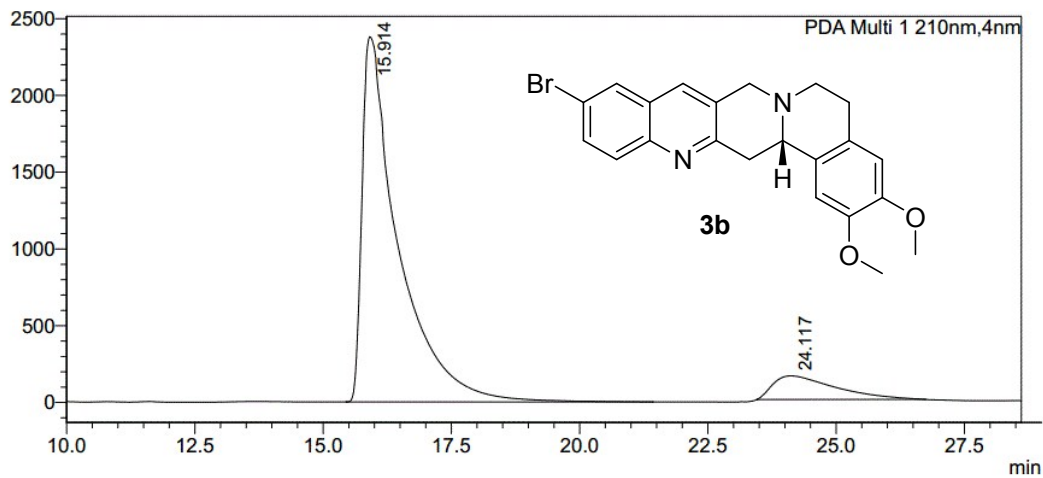

### <Peak Table>

PDA Ch1 210nm

| Peak# | Ret. Time | Area      | Height  | Conc.  | Unit | Mark | Name      |
|-------|-----------|-----------|---------|--------|------|------|-----------|
| 1     | 15.914    | 116500609 | 2378902 | 89.942 | %    |      | RT:15.914 |
| 2     | 24.117    | 13028161  | 153852  | 10.058 | %    |      | RT:24.117 |
| Total |           | 129528770 | 2532755 |        |      |      |           |

### <Chromatogram>

mAU

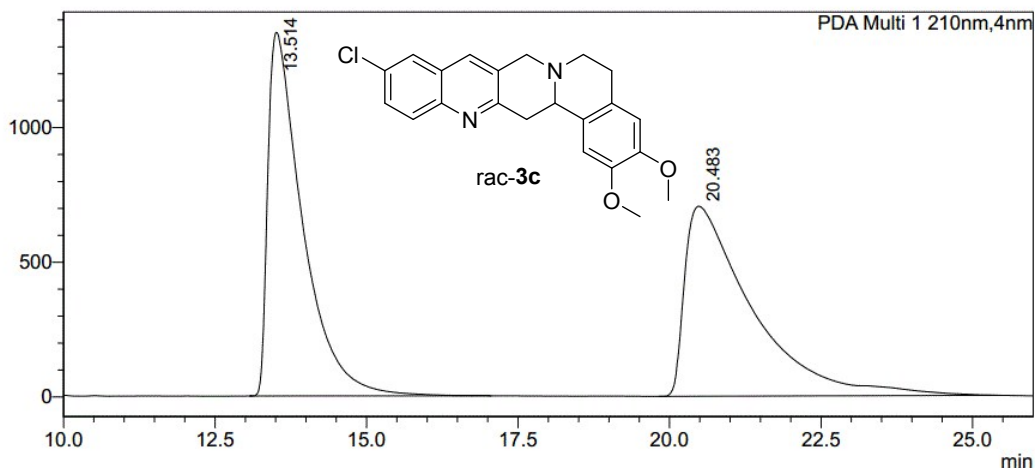

### <Peak Table>

PDA Ch1 210nm

| Peak# | Ret. Time | Area      | Height  | Conc.  | Unit | Mark | Name      |
|-------|-----------|-----------|---------|--------|------|------|-----------|
| 1     | 13.514    | 53860753  | 1350776 | 49.582 | %    |      | RT:13.514 |
| 2     | 20.483    | 54769239  | 705480  | 50.418 | %    |      | RT:20.483 |
| Total |           | 108629991 | 2056256 |        |      |      |           |

### <Chromatogram>

mAU

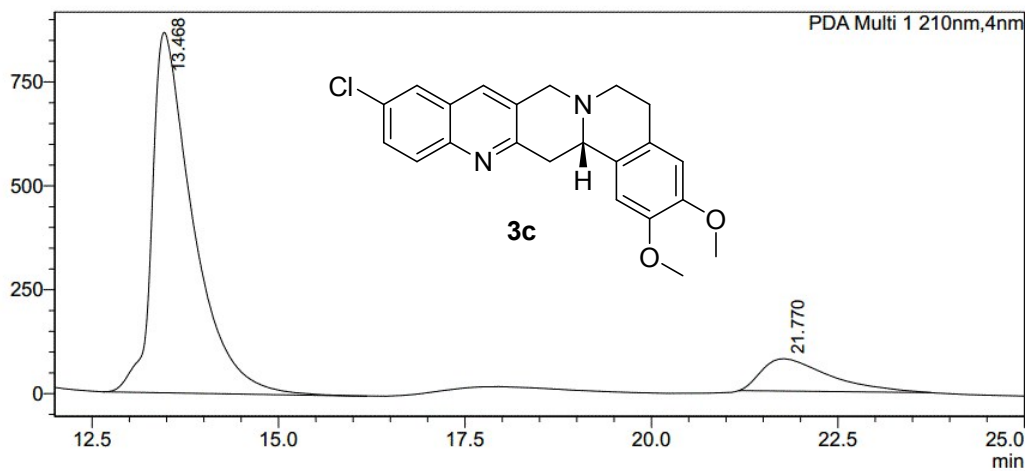

### <Peak Table>

PDA Ch1 210nm

| Peak# | Ret. Time | Area     | Height | Conc.  | Unit | Mark | Name      |
|-------|-----------|----------|--------|--------|------|------|-----------|
| 1     | 13.468    | 33155378 | 867208 | 87.048 | %    |      | RT:13.468 |
| 2     | 21.770    | 4933360  | 77780  | 12.952 | %    |      | RT:21.770 |
| Total |           | 38088737 | 944989 |        |      |      |           |

# <Chromatogram>

mAU

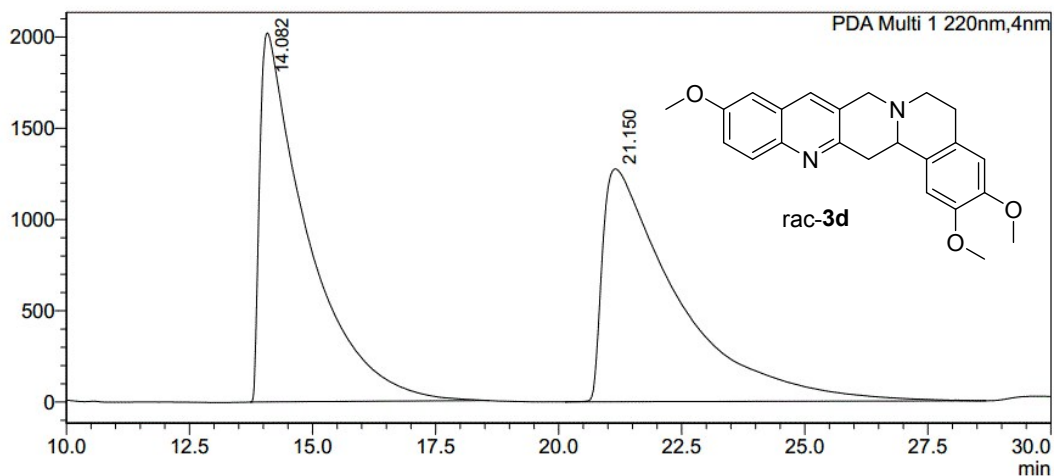

## <Peak Table>

PDA Ch1 220nm

| Peak# | Ret. Time | Area      | Height  | Conc.  | Unit | Mark | Name      |
|-------|-----------|-----------|---------|--------|------|------|-----------|
| 1     | 14.082    | 135195674 | 2021199 | 49.859 | %    |      | RT:14.082 |
| 2     | 21.150    | 135958307 | 1275340 | 50.141 | %    |      | RT:21.150 |
| Total |           | 271153980 | 3296539 |        |      |      |           |

# <Chromatogram>

mAU

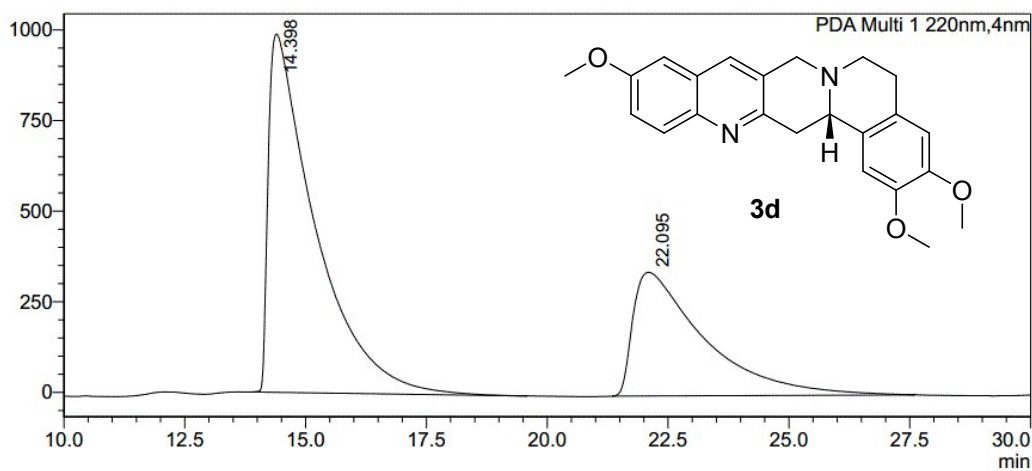

## <Peak Table>

PDA Ch1 220nm

| Peak# | Ret. Time | Area      | Height  | Conc.  | Unit | Mark | Name      |
|-------|-----------|-----------|---------|--------|------|------|-----------|
| 1     | 14.398    | 66348104  | 988553  | 65.505 | %    |      | RT:14.398 |
| 2     | 22.095    | 34939467  | 341219  | 34.495 | %    |      | RT:22.095 |
| Total |           | 101287571 | 1329771 |        |      |      |           |

### <Chromatogram>

mAU

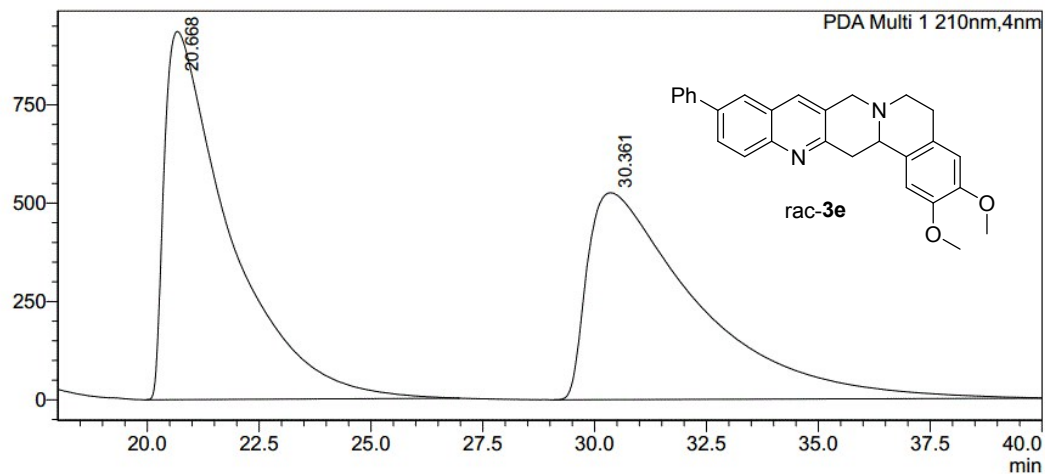

### <Peak Table>

PDA Ch1 210nm

| Peak# | Ret. Time | Area      | Height  | Conc.  | Unit | Mark | Name      |
|-------|-----------|-----------|---------|--------|------|------|-----------|
| 1     | 20.668    | 94869944  | 935940  | 51.182 | %    |      | RT:20.668 |
| 2     | 30.361    | 90487284  | 526128  | 48.818 | %    |      | RT:30.361 |
| Total |           | 185357228 | 1462069 |        |      |      |           |

### <Chromatogram>

mAU

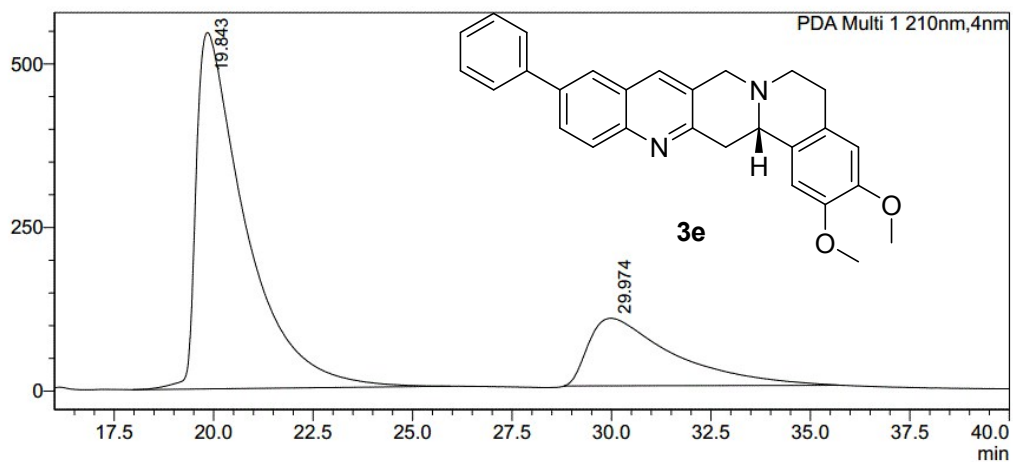

### <Peak Table>

PDA Ch1 210nm

| Peak# | Ret. Time | Area     | Height | Conc.  | Unit | Mark | Name      |
|-------|-----------|----------|--------|--------|------|------|-----------|
| 1     | 19.843    | 46899831 | 544586 | 75.422 | %    | S    | RT:19.843 |
| 2     | 29.974    | 15282993 | 103228 | 24.578 | %    |      | RT:29.974 |
| Total |           | 62182824 | 647814 |        |      |      |           |

### <Chromatogram>

mAU

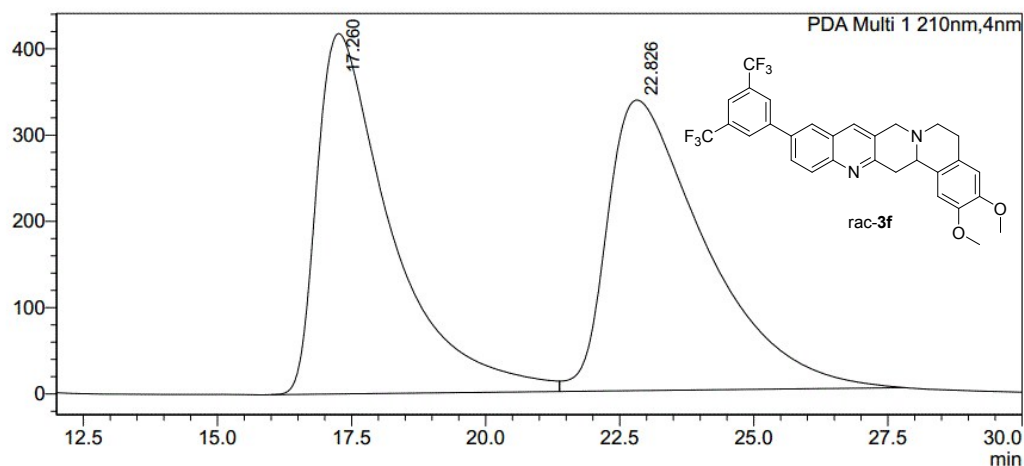

### <Peak Table>

PDA Ch1 210nm

| Peak# | Ret. Time | Area     | Height | Conc.  | Unit | Mark | Name      |
|-------|-----------|----------|--------|--------|------|------|-----------|
| 1     | 17.260    | 40297887 | 417528 | 48.345 | %    |      | RT:17.260 |
| 2     | 22.826    | 43056956 | 336701 | 51.655 | %    | V    | RT:22.826 |
| Total |           | 83354843 | 754229 |        |      |      |           |

### <Chromatogram>

mAU

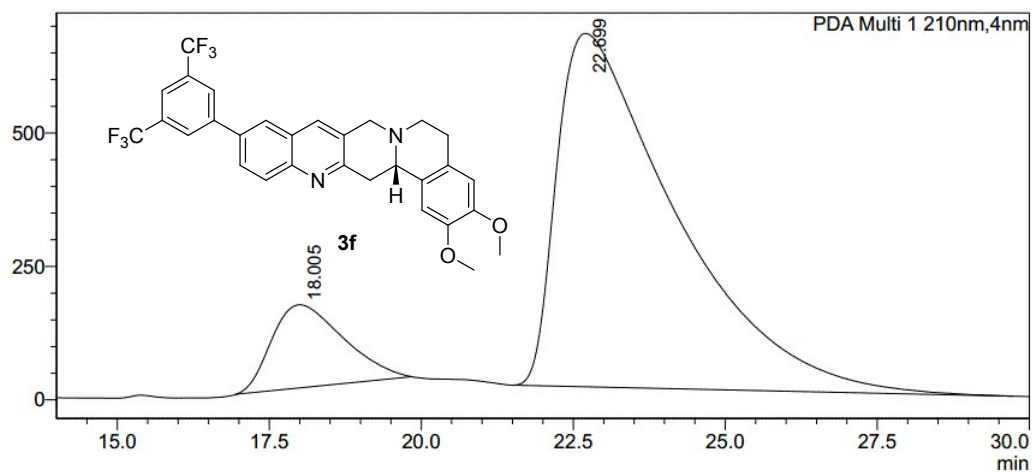

### <Peak Table>

PDA Ch1 210nm

| Peak# | Ret. Time | Area      | Height | Conc.  | Unit | Mark | Name      |
|-------|-----------|-----------|--------|--------|------|------|-----------|
| 1     | 18.005    | 12720563  | 155673 | 12.356 | %    |      | RT:18.005 |
| 2     | 22.699    | 90225962  | 662381 | 87.644 | %    |      | RT:22.699 |
| Total |           | 102946525 | 818054 |        |      |      |           |

### <Chromatogram>

mAU

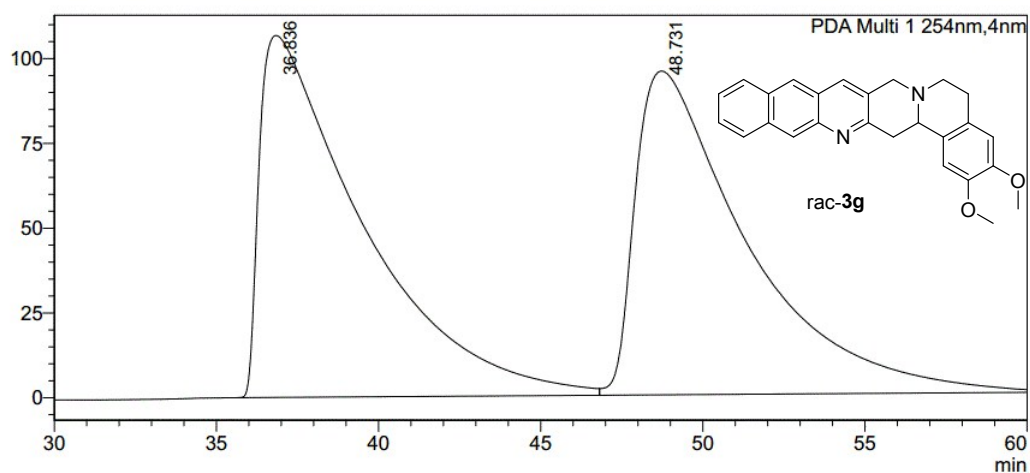

### <Peak Table>

PDA Ch1 254nm

| Peak# | Ret. Time | Area     | Height | Conc.  | Unit | Mark | Name      |
|-------|-----------|----------|--------|--------|------|------|-----------|
| 1     | 36.836    | 23572235 | 106709 | 50.671 | %    |      | RT:36.836 |
| 2     | 48.731    | 22947718 | 95468  | 49.329 | %    | SV   | RT:48.731 |
| Total |           | 46519953 | 202177 |        |      |      |           |

### <Chromatogram>

mAU

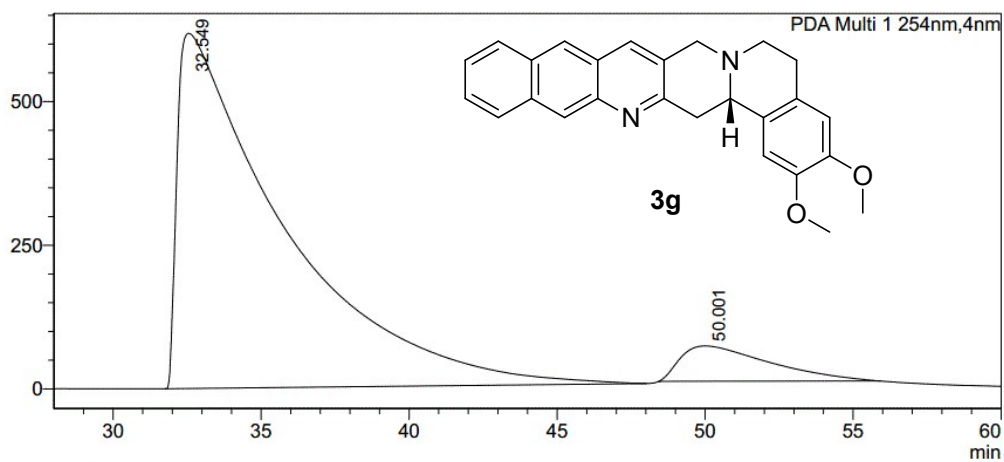

### <Peak Table>

PDA Ch1 254nm

| Peak# | Ret. Time | Area      | Height | Conc.  | Unit | Mark | Name      |
|-------|-----------|-----------|--------|--------|------|------|-----------|
| 1     | 32.549    | 153654060 | 618178 | 92.295 | %    |      | RT:32.549 |
| 2     | 50.001    | 12828045  | 61383  | 7.705  | %    |      | RT:50.001 |
| Total |           | 166482105 | 679561 |        |      |      |           |



### <Chromatogram>

mAU

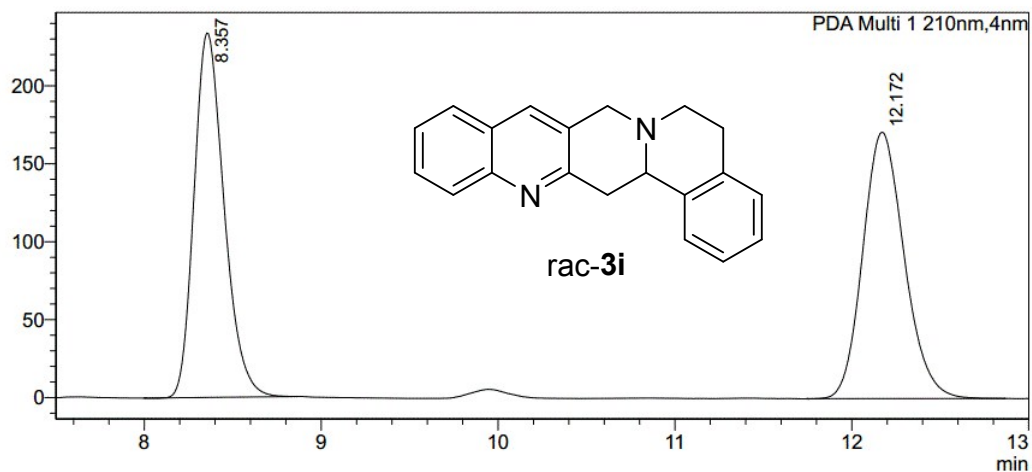

### <Peak Table>

PDA Ch1 210nm

| Peak# | Ret. Time | Area    | Height | Conc.  | Unit | Mark | Name      |
|-------|-----------|---------|--------|--------|------|------|-----------|
| 1     | 8.357     | 2760198 | 227935 | 49.751 | %    | M    | RT:8.357  |
| 2     | 12.172    | 2787862 | 169641 | 50.249 | %    |      | RT:12.172 |
| Total |           | 5548060 | 397576 |        |      |      |           |

### <Chromatogram>

mAU

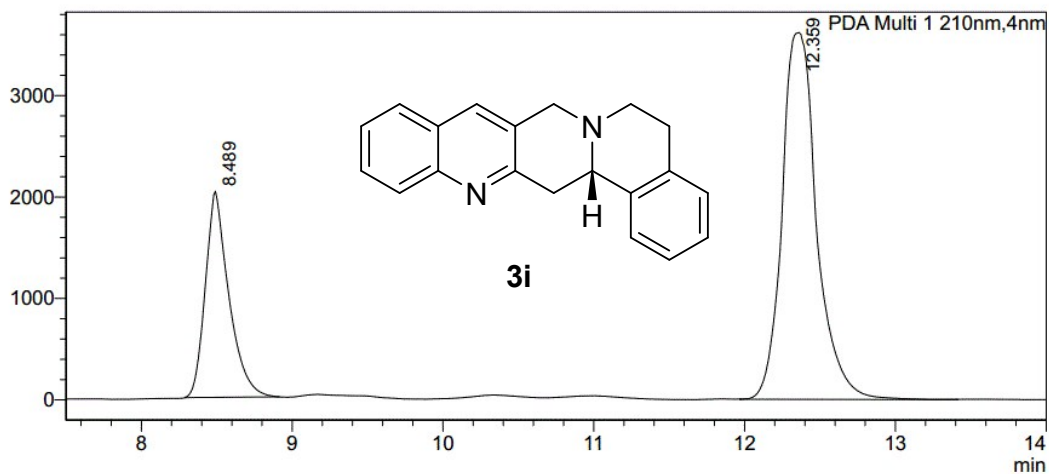

### <Peak Table>

PDA Ch1 210nm

| Peak# | Ret. Time | Area     | Height  | Conc.  | Unit | Mark | Name      |
|-------|-----------|----------|---------|--------|------|------|-----------|
| 1     | 8.489     | 21885599 | 2031733 | 27.517 | %    |      | RT:8.489  |
| 2     | 12.359    | 57650011 | 3615642 | 72.483 | %    |      | RT:12.359 |
| Total |           | 79535610 | 5647375 |        |      |      |           |

### <Chromatogram>

mAU

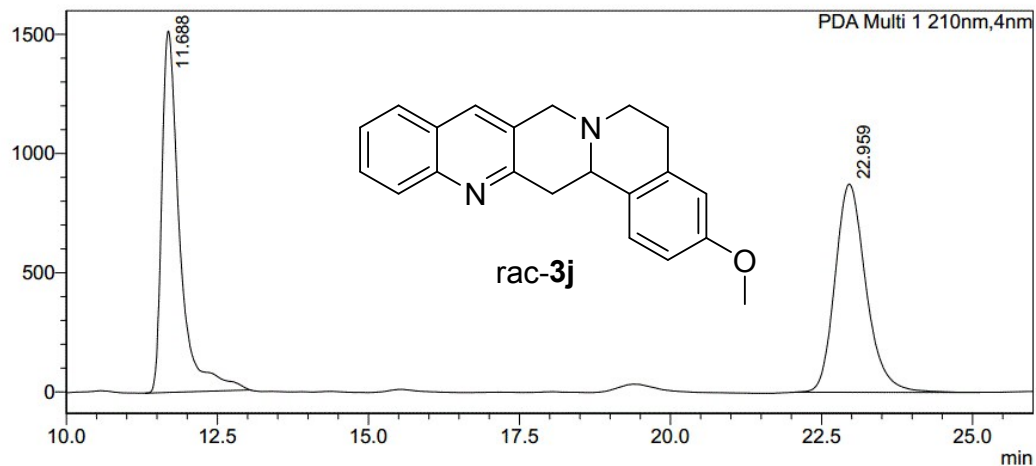

### <Peak Table>

PDA Ch1 210nm

| Peak# | Ret. Time | Area     | Height  | Conc.  | Unit | Mark | Name      |
|-------|-----------|----------|---------|--------|------|------|-----------|
| 1     | 11.688    | 31333809 | 1516358 | 50.108 | %    |      | RT:11.688 |
| 2     | 22.959    | 31198711 | 873313  | 49.892 | %    |      | RT:22.959 |
| Total |           | 62532519 | 2389670 |        |      |      |           |

### <Chromatogram>

mAU

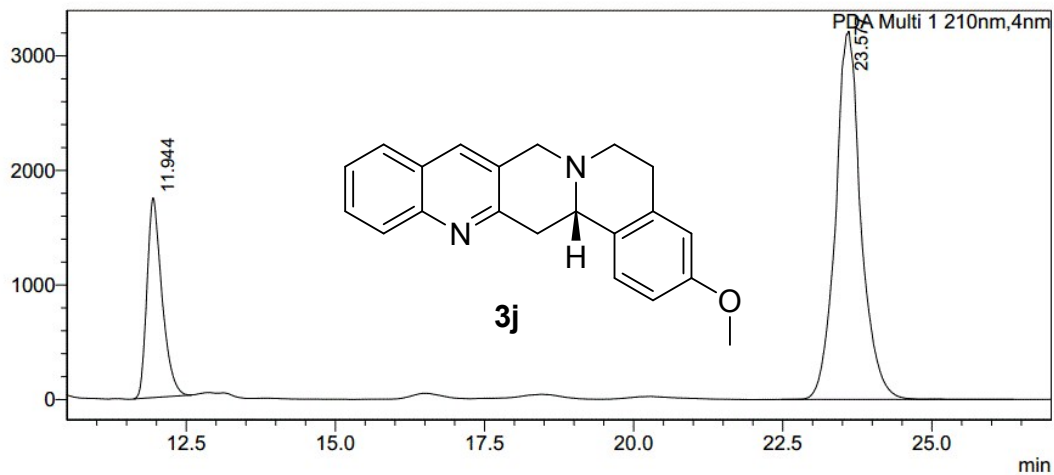

### <Peak Table>

PDA Ch1 210nm

| Peak# | Ret. Time | Area      | Height  | Conc.  | Unit | Mark | Name      |
|-------|-----------|-----------|---------|--------|------|------|-----------|
| 1     | 11.944    | 30426970  | 1742190 | 24.179 | %    |      | RT:11.944 |
| 2     | 23.577    | 95415069  | 3190786 | 75.821 | %    | S    | RT:23.577 |
| Total |           | 125842039 | 4932976 |        |      |      |           |



# <Chromatogram>

mAU

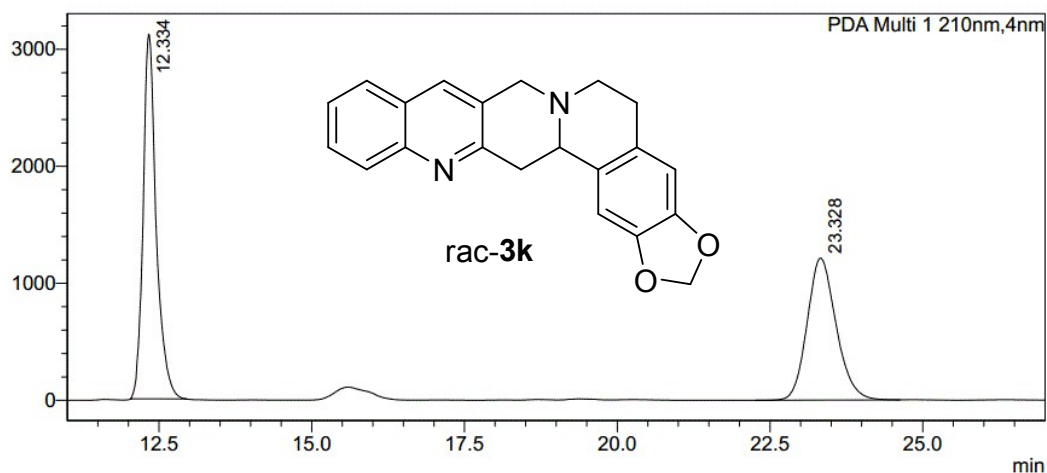

## <Peak Table>

PDA Ch1 210nm

| Peak# | Ret. Time | Area     | Height  | Conc.  | Unit | Mark | Name      |
|-------|-----------|----------|---------|--------|------|------|-----------|
| 1     | 12.334    | 46440122 | 3118335 | 53.752 | %    |      | RT:12.334 |
| 2     | 23.328    | 39956661 | 1213567 | 46.248 | %    |      | RT:23.328 |
| Total |           | 86396782 | 4331902 |        |      |      |           |

# <Chromatogram>

mAU

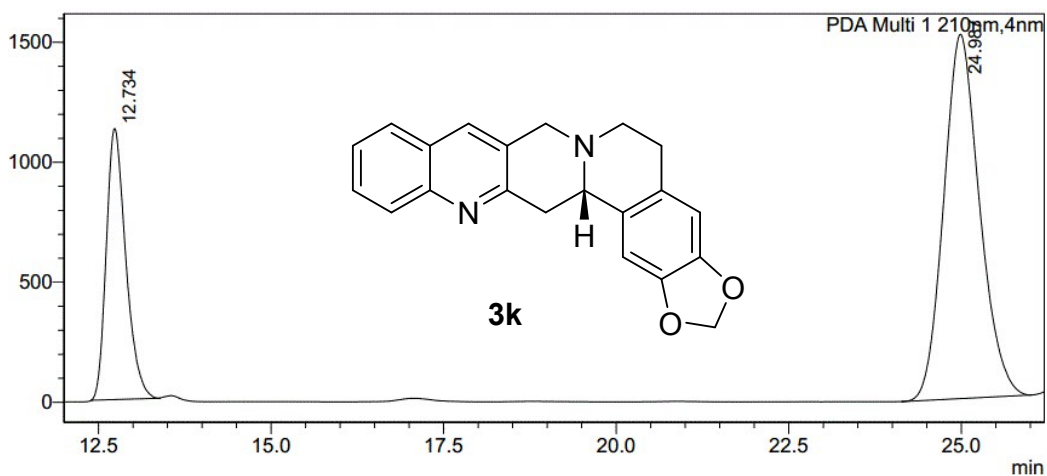

## <Peak Table>

PDA Ch1 210nm

| Peak# | Ret. Time | Area     | Height  | Conc.  | Unit | Mark | Name      |
|-------|-----------|----------|---------|--------|------|------|-----------|
| 1     | 12.734    | 22199881 | 1129525 | 28.848 | %    |      | RT:12.734 |
| 2     | 24.987    | 54754828 | 1518513 | 71.152 | %    |      | RT:24.987 |
| Total |           | 76954709 | 2648038 |        |      |      |           |

### <Chromatogram>

mAU

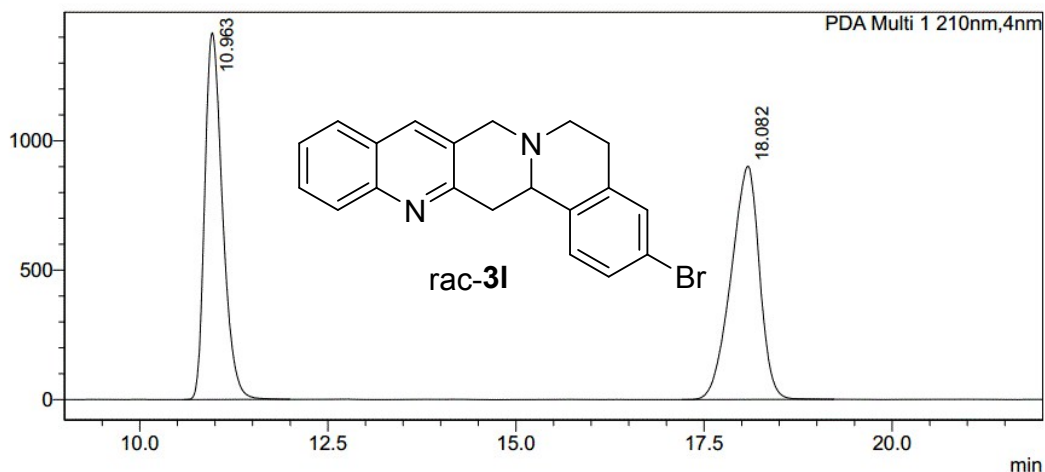

### <Peak Table>

PDA Ch1 210nm

| Peak# | Ret. Time | Area     | Height  | Conc.  | Unit | Mark | Name      |
|-------|-----------|----------|---------|--------|------|------|-----------|
| 1     | 10.963    | 23271217 | 1417022 | 49.520 | %    |      | RT:10.963 |
| 2     | 18.082    | 23722105 | 900559  | 50.480 | %    |      | RT:18.082 |
| Total |           | 46993322 | 2317582 |        |      |      |           |

### <Chromatogram>

mAU

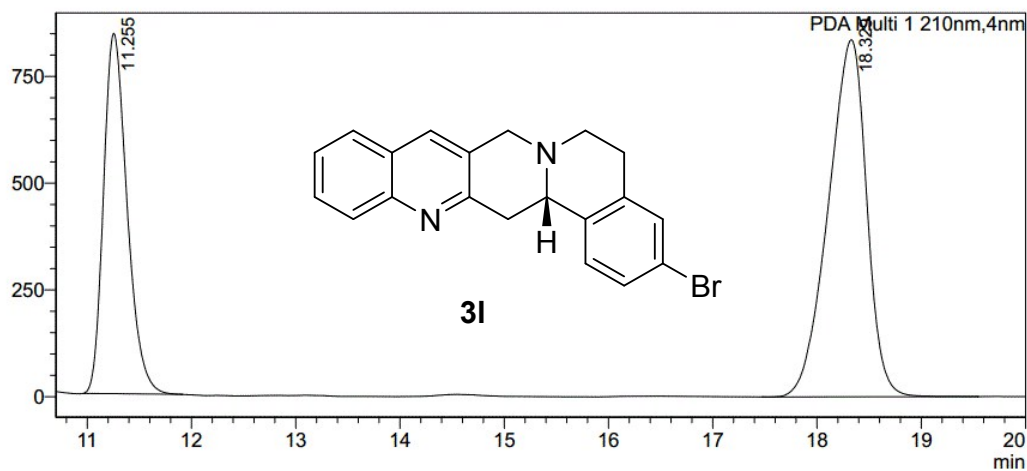

### <Peak Table>

PDA Ch1 210nm

| Peak# | Ret. Time | Area     | Height  | Conc.  | Unit | Mark | Name      |
|-------|-----------|----------|---------|--------|------|------|-----------|
| 1     | 11.255    | 13248869 | 844339  | 38.258 | %    |      | RT:11.255 |
| 2     | 18.329    | 21381638 | 836298  | 61.742 | %    | S    | RT:18.329 |
| Total |           | 34630507 | 1680637 |        |      |      |           |

# <Chromatogram>

mAU

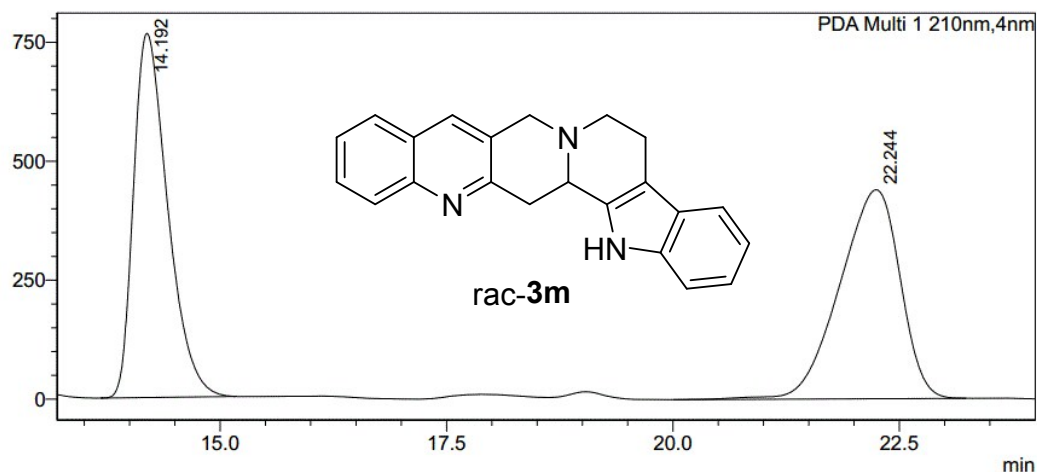

## <Peak Table>

PDA Ch1 210nm

| Peak# | Ret. Time | Area     | Height  | Conc.  | Unit | Mark | Name      |
|-------|-----------|----------|---------|--------|------|------|-----------|
| 1     | 14.192    | 20090465 | 765292  | 49.617 | %    |      | RT:14.192 |
| 2     | 22.244    | 20400559 | 439358  | 50.383 | %    |      | RT:22.244 |
| Total |           | 40491024 | 1204650 |        |      |      |           |

# <Chromatogram>

mAU

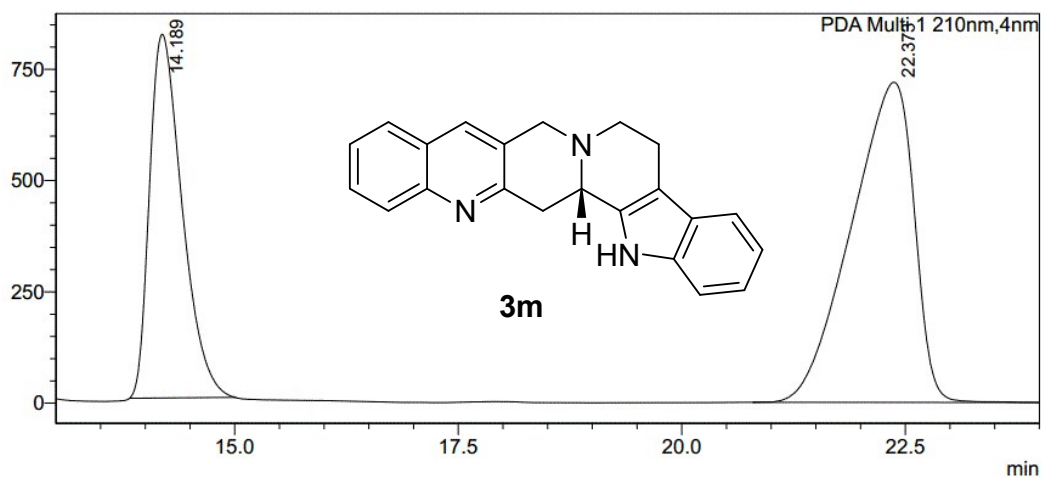

## <Peak Table>

PDA Ch1 210nm

| Peak# | Ret. Time | Area     | Height  | Conc.  | Unit | Mark | Name      |
|-------|-----------|----------|---------|--------|------|------|-----------|
| 1     | 14.189    | 20753320 | 817352  | 37.169 | %    |      | RT:14.189 |
| 2     | 22.373    | 35081515 | 719207  | 62.831 | %    |      | RT:22.373 |
| Total |           | 55834835 | 1536559 |        |      |      |           |

## 9. Other Substrates

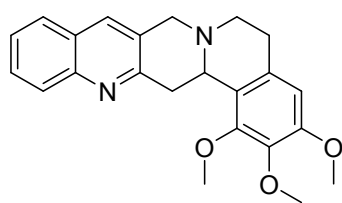

60% yield, 57:43 e.r.

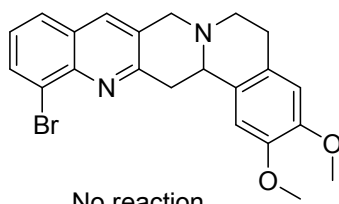

No reaction

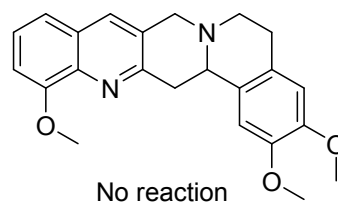

No reaction

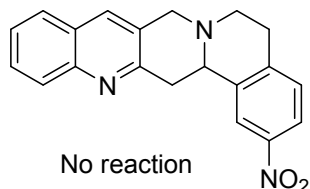

No reaction

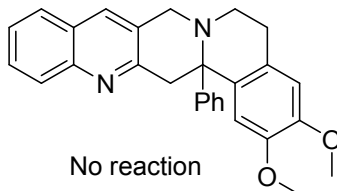

No reaction

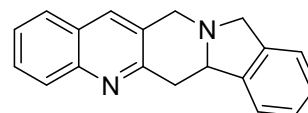

No reaction

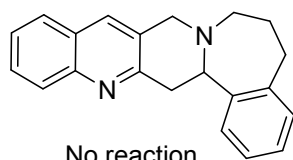

No reaction

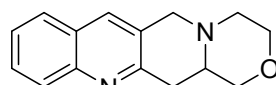

No reaction

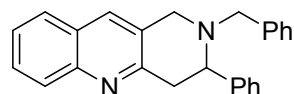

No reaction

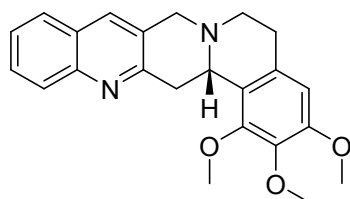

**(S)-1,2,3-Trimethoxy-6,8,15,15a-tetrahydro-5H-benzo[b]isoquinolino[2,1-g][1,6]naphthyridine:** yellow solid, 94% yield.  $^1\text{H}$  NMR (400 MHz,  $\text{CDCl}_3$ ):  $\delta$  8.03 (d,  $J = 8.0$  Hz, 1H), 7.88 (s, 1H), 7.76 (d,  $J = 8.0$  Hz, 1H), 7.66 (t,  $J = 8.0$  Hz, 1H), 7.48 (t,  $J = 8.0$  Hz, 1H), 6.46 (s, 1H), 4.20-4.32 (m, 3H), 3.93-4.00 (m, 1H), 3.96 (s, 3H), 3.86 (s, 6H), 3.01-3.19 (m, 3H), 2.88-2.93 (m, 1H), 2.76-2.82 (m, 1H);  $^{13}\text{C}$  NMR (100 MHz,  $\text{CDCl}_3$ ):  $\delta$  156.9, 152.3, 150.9, 147.1, 140.2, 133.0, 129.7, 129.1, 128.4, 127.3, 127.2, 127.0, 125.9, 123.2, 107.1, 60.8, 60.7, 57.0, 55.9, 55.8, 47.8, 37.6, 29.8; HRMS (EI)  $m/z$  calcd for  $\text{C}_{23}\text{H}_{24}\text{N}_2\text{O}_3$  (M) 376.1787, found 376.1788.

**(S)-1,2,3-Trimethoxy-6,8,15,15a-tetrahydro-5H-benzo[b]isoquinolino[2,1-g][1,6]naphthyridine**

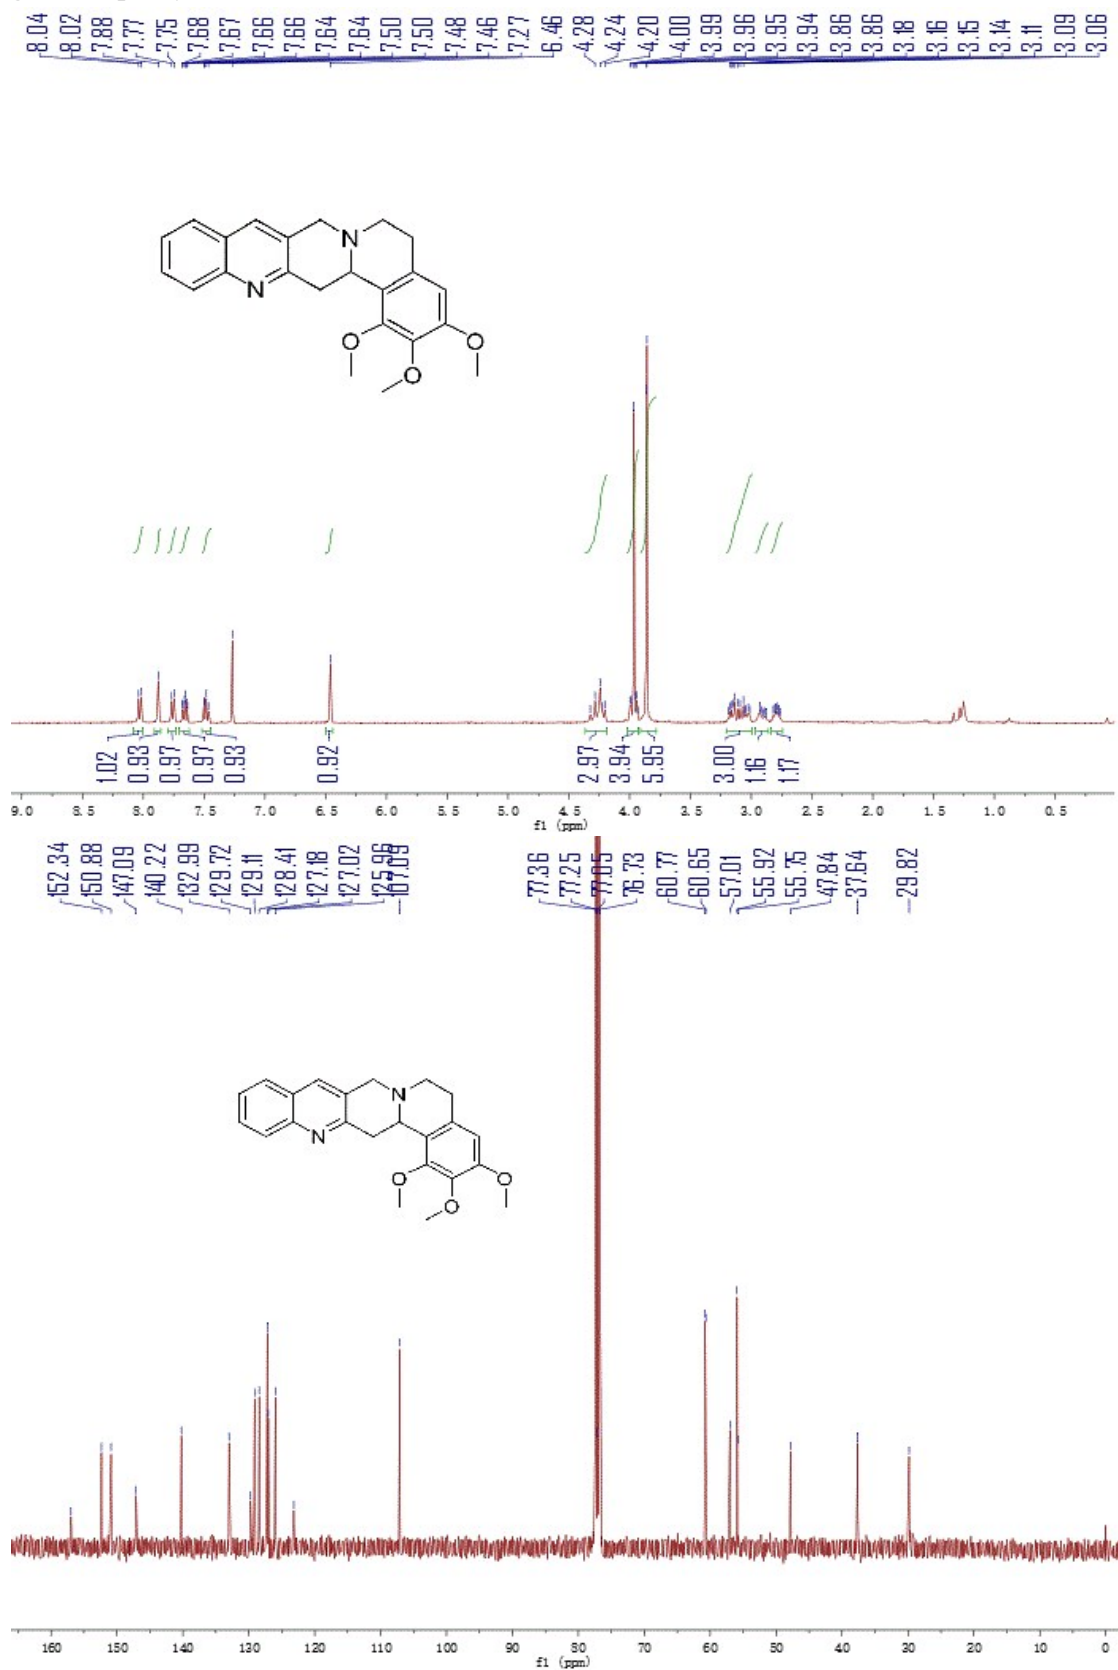

# <Chromatogram>

mAU

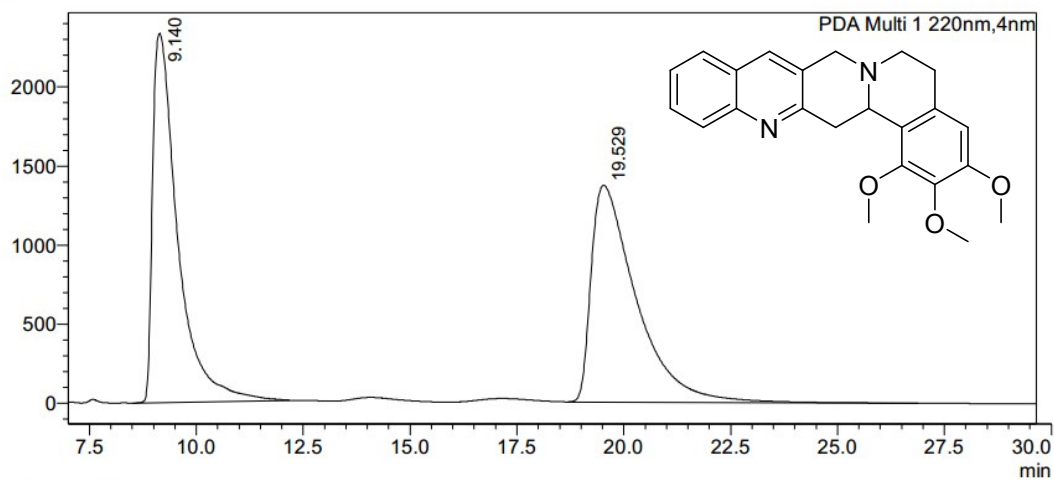

## <Peak Table>

PDA Ch1 220nm

| Peak# | Ret. Time | Area      | Height  | Conc.  | Unit | Mark | Name      |
|-------|-----------|-----------|---------|--------|------|------|-----------|
| 1     | 9.140     | 95166961  | 2334574 | 48.593 | %    |      | RT:9.140  |
| 2     | 19.529    | 100676140 | 1370386 | 51.407 | %    |      | RT:19.529 |
| Total |           | 195843101 | 3704960 |        |      |      |           |

# <Chromatogram>

mAU

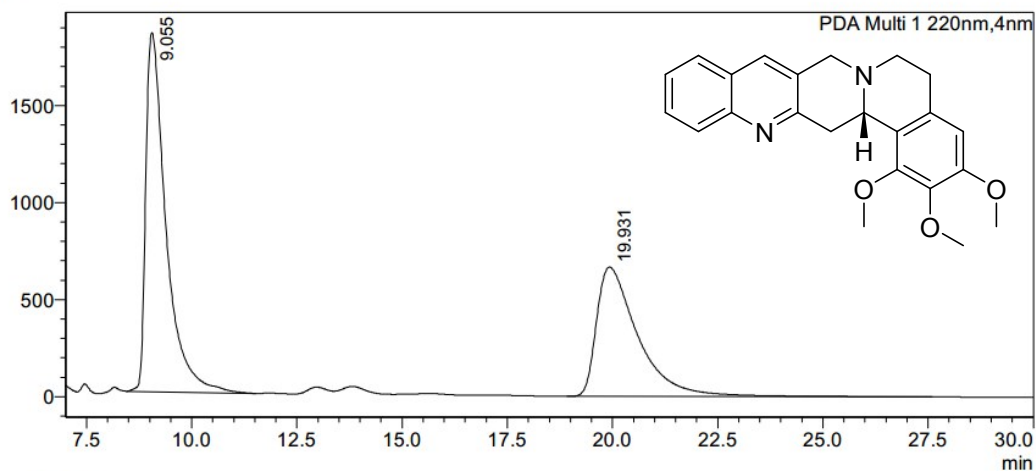

## <Peak Table>

PDA Ch1 220nm

| Peak# | Ret. Time | Area      | Height  | Conc.  | Unit | Mark | Name      |
|-------|-----------|-----------|---------|--------|------|------|-----------|
| 1     | 9.055     | 61703446  | 1848361 | 57.331 | %    |      | RT:9.055  |
| 2     | 19.931    | 45923854  | 666574  | 42.669 | %    |      | RT:19.931 |
| Total |           | 107627299 | 2514935 |        |      |      |           |
